# Supplementary material for: Copper-catalyzed regioselective [3+2] annulation of malonate-tethered acyl oximes with isatins
Source: Royal Society of Chemistry journal article supplement (doi:10.1039/d0cc07995b), 2021-01-01
Supplement: d0cc07995b1.pdf [file d0cc07995b1.pdf]

# Supporting Information

## Copper-catalyzed regioselective [3 + 2] annulation of malonate-tethered acyl oximes with isatins

Jindian Duan,<sup>†a</sup> Yiyang Mao,<sup>†a</sup> Anmei Xian,<sup>†b</sup> Binsen Rong,<sup>a</sup> Gaochen Xu,<sup>a</sup> Zhenjiang Li,<sup>a</sup> Lili Zhao<sup>\*b</sup> Ning Zhu<sup>\*a</sup> and Kai Guo<sup>\*a</sup>

<sup>a</sup>College of Biotechnology and Pharmaceutical Engineering, State Key Laboratory of Materials-Oriented Chemical Engineering, Nanjing Tech University, 30 Puzhu Rd S, Nanjing, 211816, China.

E-mail: ningzhu@njtech.edu.cn; guok@njtech.edu.cn

<sup>b</sup>Institute of Advanced Synthesis, School of Chemistry and Molecular Engineering, Nanjing Tech University, 30 Puzhu Rd S, Nanjing, 211816, China. E-mail: ias\_llzhao@njtech.edu.cn

<sup>†</sup>J. D., Y. M and A. X. contributed equally to this work.

### Contents

|                                                              |            |
|--------------------------------------------------------------|------------|
| <b>Experimental section</b>                                  | <b>S2</b>  |
| <b>General</b>                                               | <b>S2</b>  |
| <b>Optimization table S1</b>                                 | <b>S2</b>  |
| <b>General procedure for the preparation of 3</b>            | <b>S3</b>  |
| <b>Compounds characterization</b>                            | <b>S3</b>  |
| <b>NMR spectra of compounds</b>                              | <b>S10</b> |
| <b>Crystal structure and data for compound 3ba</b>           | <b>S35</b> |
| <b>Computational details</b>                                 | <b>S37</b> |
| <b>Reference</b>                                             | <b>S37</b> |
| <b>Optimized structures and the whole catalytic cycle</b>    | <b>S38</b> |
| <b>Coordinates and energies of the calculated structures</b> | <b>S40</b> |

## Experimental section

### General

Unless otherwise noted, all reactions were carried out without exclusion of air or moisture. All solvents and reagents were used without further purification as commercially available. Thin-layer chromatography (TLC) was performed on silica gel plates (60F–254) using UV-light (254 and 365 nm). Flash chromatography was conducted on silica gel (300–400 mesh). NMR (400 MHz for  $^1\text{H}$  NMR, 100 MHz for  $^{13}\text{C}$  NMR) spectra were recorded in  $\text{CDCl}_3$  or DMSO with TMS as the internal standard. Chemical shifts are reported in ppm and coupling constants are given in Hz. Data for  $^1\text{H}$  NMR are recorded as follows: chemical shift (ppm), multiplicity (s, singlet; d, doublet; t, triplet; q, quarter; m, multiplet), coupling constant (Hz), integration. Data for  $^{13}\text{C}$  NMR are reported in terms of chemical shift ( $\delta$ , ppm). High-resolution mass spectra (HRMS) were obtained on an Agilent mass spectrometer using ESI-TOF (electrospray ionization time of flight).

All the acyl oximes were all known compounds and synthesized according to previously reported literature procedure.<sup>1</sup>

### Optimization table S1

Copper-catalyzed [3 + 2] annulation of malonate-tethered acyl oximes with isatin **2a**<sup>a</sup>

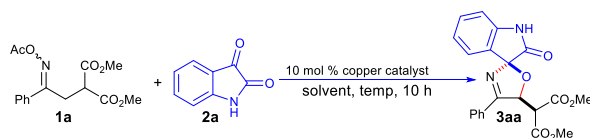

| Entry           | Catalyst          | Solvent | Temp (°C) | Yield (%) <sup>b</sup> |
|-----------------|-------------------|---------|-----------|------------------------|
| 1               | CuI               | DCE     | 95        | 57                     |
| 2               | CuBr              | DCE     | 95        | 68                     |
| 3               | CuCl              | DCE     | 95        | 53                     |
| 4               | CuOAc             | DCE     | 95        | 46                     |
| 5               | CuCl <sub>2</sub> | DCE     | 95        | trace                  |
| 6               | CuBr <sub>2</sub> | DCE     | 95        | trace                  |
| 7               | CuCN              | DCE     | 95        | trace                  |
| 8               | CuBr              | THF     | 95        | 71                     |
| 9               | CuBr              | toluene | 95        | 57                     |
| 10              | CuBr              | MeCN    | 95        | 75                     |
| 11              | CuBr              | DMSO    | 95        | 39                     |
| 12              | CuBr              | EA      | 95        | 42                     |
| 13              | CuBr              | MeCN    | 80        | 71                     |
| 14 <sup>b</sup> | CuBr              | MeCN    | 105       | 72                     |

<sup>a</sup>Reaction conditions: acetyl oxime **1a** (0.3 mmol), isatin **2a** (0.2 mmol), copper salt (10 mol%) in solvent (2 mL) for 10 h under  $\text{N}_2$ . <sup>b</sup>Isolated yields.

## General procedure for the preparation of 3

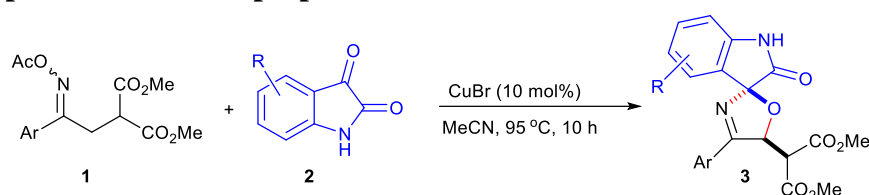

A mixture of acyl oximes **1** (0.30 mmol), isatins **2** (0.20 mmol), and CuBr (2.84 mg, 0.02 mmol) in CH<sub>3</sub>CN (2 mL) was stirred at 95 °C for 10 h under N<sub>2</sub> atmosphere until completion of the reaction as determined by TLC. After cooling to room temperature, ammonium hydroxide (10%, 10 mL) was added and the mixture was extracted with EtOAc (3 x 20 mL). The combined organic phase was dried over Na<sub>2</sub>SO<sub>4</sub>, filtered, and concentrated under reduced pressure. The residue was purified by column chromatography (PE: EA) to give the products **3**.

## Compounds characterization

### Dimethyl 2-(2-oxo-4'-phenyl-5'H-spiro[indoline-3,2'-oxazol]-5'-yl)malonate (**3aa**)

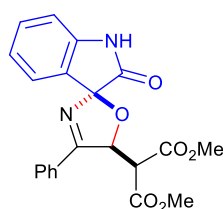

Prepared according to general procedure to afford **3aa** (59 mg, 75% yield) as a white solid; m.p. 186–187 °C; <sup>1</sup>H NMR (400 MHz, CDCl<sub>3</sub>) δ 8.11 (s, 1H), 7.65 (d, *J* = 6.9 Hz, 2H), 7.43–7.36 (m, 4H), 7.24–7.19 (m, 1H), 7.00 (t, *J* = 7.5 Hz, 1H), 6.79 (d, *J* = 7.8 Hz, 1H), 6.22 (d, *J* = 3.6 Hz, 1H), 4.04 (d, *J* = 3.7 Hz, 1H), 3.63 (s, 3H), 3.58 (s, 3H); <sup>13</sup>C NMR (100 MHz, CDCl<sub>3</sub>) δ 173.9, 172.6, 166.9, 166.0, 141.4, 131.7, 131.2, 130.7, 128.8, 127.9, 126.5, 126.2, 123.4, 110.6, 84.3, 54.8, 52.9, 52.7; HRMS (ESI): *m/z* calcd for C<sub>21</sub>H<sub>18</sub>N<sub>2</sub>NaO<sub>6</sub> [M+Na]<sup>+</sup> 417.1063, Found 417.1061.

### Dimethyl 2-(4'-(4-chlorophenyl)-2-oxo-5'H-spiro[indoline-3,2'-oxazol]-5'-yl)malonate (**3ba**)

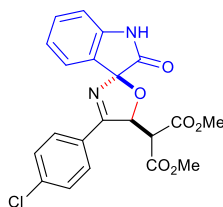

Prepared according to general procedure to afford **3ba** (65 mg, 76% yield) as a yellow solid; m.p. 170–171 °C; <sup>1</sup>H NMR (400 MHz, CDCl<sub>3</sub>) δ 8.16 (s, 1H), 7.60 (d, *J* = 8.6 Hz, 2H), 7.36–7.33 (m, 3H), 7.24–7.19 (m, 1H), 7.02–6.97 (m, 1H), 6.79 (d, *J* = 7.8 Hz, 1H), 6.18 (d, *J* = 3.6 Hz, 1H), 4.01 (d, *J* = 3.6 Hz, 1H), 3.65 (s, 3H), 3.59 (s, 3H); <sup>13</sup>C NMR (100 MHz, CDCl<sub>3</sub>) δ 173.7, 171.6, 166.7, 165.9, 141.3, 137.8, 131.3, 129.4, 129.2, 129.1, 126.3, 126.2, 123.4, 110.7, 106.3, 84.2, 54.7, 52.9, 52.8; HRMS (ESI): *m/z* calcd for C<sub>21</sub>H<sub>17</sub>ClN<sub>2</sub>NaO<sub>6</sub> [M+Na]<sup>+</sup> 451.0673, Found 451.0667.

### Dimethyl 2-(4'-(4-bromophenyl)-2-oxo-5'H-spiro[indoline-3,2'-oxazol]-5'-yl)malonate (**3ca**)

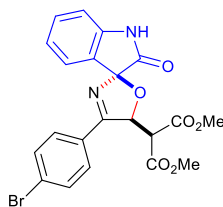

Prepared according to general procedure to afford **3ca** (74 mg, 78% yield) as a yellow solid; m.p. 158–159 °C; <sup>1</sup>H NMR (400 MHz, CDCl<sub>3</sub>) δ 8.24 (s, 1H), 7.55–7.49 (m, 4H), 7.33 (d, *J* = 7.4 Hz, 1H), 7.24–7.19 (m, 1H), 7.01–6.98 (m, 1H), 6.78 (d, *J* = 7.8 Hz, 1H), 6.18 (d, *J* = 3.6 Hz, 1H), 4.00 (d, *J* = 3.6 Hz, 1H), 3.65 (s, 3H), 3.59 (s, 3H); <sup>13</sup>C NMR (100 MHz, CDCl<sub>3</sub>) δ 173.8, 171.7, 166.8, 165.9, 141.4, 132.1, 131.3, 129.6, 129.5, 126.4, 126.3, 126.2, 123.4, 110.7, 106.4, 84.2, 54.7, 52.9, 52.8; HRMS (ESI): *m/z* calcd for C<sub>21</sub>H<sub>17</sub>BrN<sub>2</sub>NaO<sub>6</sub> [M+Na]<sup>+</sup> 495.0168, Found 495.0166.

**Dimethyl 2-(4'-(4-cyanophenyl)-2-oxo-5'H-spiro[indoline-3,2'-oxazol]-5'-yl)malonate (3da)**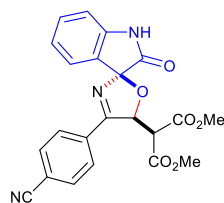

Prepared according to general procedure to afford **3da** (59 mg, 71% yield) as a yellow solid; m.p. 195–196 °C; <sup>1</sup>H NMR (400 MHz, CDCl<sub>3</sub>) δ 7.69–7.66 (m, 2H), 7.63 (s, 1H), 7.46–7.37 (m, 3H), 7.13–7.11 (m, 1H), 7.02–6.97 (m, 2H), 6.26 (d, *J* = 8.9 Hz, 1H), 4.34 (d, *J* = 8.9 Hz, 1H), 3.71 (s, 3H), 3.10 (s, 3H); <sup>13</sup>C NMR (100 MHz, CDCl<sub>3</sub>) δ 173.3, 172.9, 167.1, 166.3, 142.1, 132.2, 130.4, 128.7, 128.6, 126.7, 126.4, 125.7, 124.9, 113.9, 106.3, 84.9, 58.7, 53.1,

52.3; HRMS (ESI): *m/z* calcd for C<sub>22</sub>H<sub>17</sub>N<sub>3</sub>NaO<sub>6</sub> [M+Na]<sup>+</sup> 442.1015, Found 442.1012.

**Dimethyl 2-(2-oxo-4'-(p-tolyl)-5'H-spiro[indoline-3,2'-oxazol]-5'-yl)malonate (3ea)**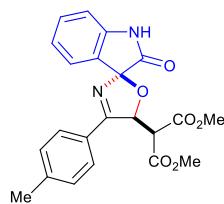

Prepared according to general procedure to afford **3ea** (68 mg, 83% yield) as a yellow solid; m.p. 202–203 °C; <sup>1</sup>H NMR (400 MHz, CDCl<sub>3</sub>) δ 8.34 (s, 1H), 7.55 (d, *J* = 8.1 Hz, 2H), 7.37 (d, *J* = 7.4 Hz, 1H), 7.21–7.16 (m, 3H), 6.98 (t, *J* = 7.6 Hz, 1H), 6.77 (d, *J* = 7.7 Hz, 1H), 6.20 (d, *J* = 3.6 Hz, 1H), 4.04 (d, *J* = 3.6 Hz, 1H), 3.63 (s, 3H), 3.59 (s, 3H), 2.31 (s, 3H); <sup>13</sup>C NMR (100 MHz, CDCl<sub>3</sub>) δ 174.3, 172.4, 166.9, 166.1, 142.2, 141.5, 131.2, 129.5, 127.9, 127.8,

126.6, 126.2, 123.3, 110.7, 106.4, 84.2, 54.9, 52.9, 52.7, 21.6; HRMS (ESI): *m/z* calcd for C<sub>22</sub>H<sub>20</sub>N<sub>2</sub>NaO<sub>6</sub> [M+Na]<sup>+</sup> 431.1219, Found 431.1212.

**Dimethyl 2-(4'-(4-methoxyphenyl)-2-oxo-5'H-spiro[indoline-3,2'-oxazol]-5'-yl)malonate (3fa)**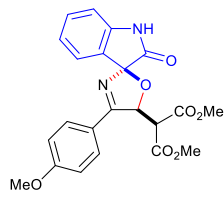

Prepared according to general procedure to afford **3fa** (65 mg, 77% yield) as a white solid; m.p. 193–195 °C; <sup>1</sup>H NMR (400 MHz, CDCl<sub>3</sub>) δ 8.44 (s, 1H), 7.63–7.60 (m, 2H), 7.36 (d, *J* = 7.3 Hz, 1H), 7.20–7.16 (m, 1H), 6.97 (t, *J* = 7.6 Hz, 1H), 6.87 (d, *J* = 8.6 Hz, 2H), 6.77 (d, *J* = 7.8 Hz, 1H), 6.19 (d, *J* = 3.6 Hz, 1H), 4.04 (d, *J* = 3.8 Hz, 1H), 3.76 (s, 3H), 3.63 (s, 3H), 3.59 (s, 3H);

<sup>13</sup>C NMR (100 MHz, CDCl<sub>3</sub>) δ 174.4, 171.7, 166.9, 166.3, 162.3, 141.5, 131.1, 129.8, 126.7, 126.1, 123.3, 123.00, 114.2, 110.7, 106.3, 84.0, 55.4, 55.2, 52.9, 52.7; HRMS (ESI): *m/z* calcd for C<sub>22</sub>H<sub>20</sub>N<sub>2</sub>NaO<sub>7</sub> [M+Na]<sup>+</sup> 447.1168, Found 447.1163.

**Dimethyl 2-(4'-(3-bromophenyl)-2-oxo-5'H-spiro[indoline-3,2'-oxazol]-5'-yl)malonate (3ga)**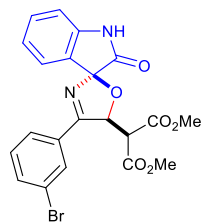

Prepared according to general procedure to afford **3ga** (60 mg, 64% yield) as a pale sticky oil; <sup>1</sup>H NMR (400 MHz, CDCl<sub>3</sub>) δ 8.49 (s, 1H), 7.92–7.91 (m, 1H), 7.63–7.61 (m, 2H), 7.40 (d, *J* = 7.4 Hz, 1H), 7.35–7.26 (m, 2H), 7.07 (t, *J* = 7.6 Hz, 1H), 6.88 (d, *J* = 7.8 Hz, 1H), 6.25 (d, *J* = 3.7 Hz, 1H), 4.10 (d, *J* = 3.7 Hz, 1H), 3.74 (s, 3H), 3.69 (s, 3H); <sup>13</sup>C NMR (100 MHz, CDCl<sub>3</sub>) δ 173.8, 171.5, 166.7, 166.0, 141.4, 134.6, 132.7, 131.4, 130.9, 130.3, 126.5, 126.2, 126.1,

123.5, 122.9, 110.8, 106.3, 84.3, 54.7, 53.0, 52.9; HRMS (ESI): *m/z* calcd for C<sub>21</sub>H<sub>17</sub>BrN<sub>2</sub>NaO<sub>6</sub> [M+Na]<sup>+</sup> 495.0168, Found 495.0163.

**Dimethyl 2-(4'-(3-methoxyphenyl)-2-oxo-5'H-spiro[indoline-3,2'-oxazol]-5'-yl)malonate (3ha)**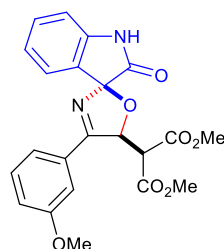

Prepared according to general procedure to afford **3ha** (53 mg, 63% yield) as a white solid; m.p. 187–188 °C; <sup>1</sup>H NMR (400 MHz, CDCl<sub>3</sub>) δ 8.08 (s, 1H), 7.29–7.13 (m, 4H), 7.15 (d, *J* = 7.4 Hz, 1H), 6.99–6.94 (m, 2H), 6.82 (d, *J* = 7.8 Hz, 1H), 6.27 (d, *J* = 8.9 Hz, 1H), 4.39 (d, *J* = 8.9 Hz, 1H), 3.77 (s, 3H), 3.69 (s, 3H), 3.16 (s, 3H); <sup>13</sup>C NMR (100 MHz, CDCl<sub>3</sub>) δ 173.5, 172.8, 167.2, 166.5, 159.8, 141.0, 131.7, 131.3, 129.7, 126.8, 125.3, 123.4, 121.0, 119.0, 112.6, 110.6, 106.9, 84.8, 58.8, 55.5, 53.0, 52.3; HRMS (ESI): *m/z* calcd for C<sub>22</sub>H<sub>20</sub>N<sub>2</sub>NaO<sub>7</sub> [M+Na]<sup>+</sup> 447.1168, Found 447.1161.

**Dimethyl 2-(4'-(2-chlorophenyl)-2-oxo-5'H-spiro[indoline-3,2'-oxazol]-5'-yl)malonate (3ia)**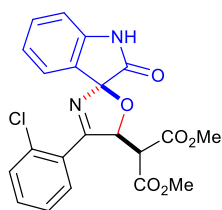

Prepared according to general procedure to afford **3ia** (51 mg, 59% yield) as a white solid; m.p. 160–162 °C; dr = 3:1; Major diastereomer: <sup>1</sup>H NMR (400 MHz, CDCl<sub>3</sub>) δ 6.97 (s, 1H), 6.05–6.03 (m, 1H), 5.75–5.71 (m, 2H), 5.69–5.55 (m, 3H), 5.36 (t, *J* = 7.6 Hz, 1H), 5.18 (d, *J* = 7.8 Hz, 1H), 4.78 (d, *J* = 3.7 Hz, 1H), 2.31 (d, *J* = 3.7 Hz, 1H), 2.02 (s, 3H), 1.91 (s, 3H). <sup>13</sup>C NMR (100 MHz, CDCl<sub>3</sub>) δ 173.7, 172.9, 166.8, 165.9, 141.6, 132.2, 132.0, 131.9, 131.4, 130.7, 130.1, 127.1, 126.4, 126.1, 123.3, 110.8, 105.9, 85.1, 53.6, 52.9, 52.7; HRMS (ESI): *m/z* calcd for C<sub>21</sub>H<sub>17</sub>ClN<sub>2</sub>NaO<sub>6</sub> [M+Na]<sup>+</sup> 451.0673, Found 451.0669.

**Dimethyl 2-(4'-(2-methoxyphenyl)-2-oxo-5'H-spiro[indoline-3,2'-oxazol]-5'-yl)malonate (3ja)**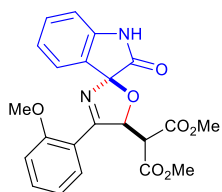

Prepared according to general procedure to afford **3ja** (56 mg, 66% yield) as a pale sticky oil; <sup>1</sup>H NMR (400 MHz, CDCl<sub>3</sub>) δ 8.15 (s, 1H), 7.76–7.74 (m, 1H), 7.38–7.35 (m, 1H), 7.19–7.15 (m, 2H), 6.96–6.92 (m, 2H), 6.88 (d, *J* = 8.4 Hz, 1H), 6.79 (d, *J* = 7.5 Hz, 1H), 6.43–6.41 (m, 1H), 4.25–4.23 (m, 1H), 3.82 (d, *J* = 1.6 Hz, 3H), 3.68 (d, *J* = 1.8 Hz, 3H), 3.12 (d, *J* = 1.6 Hz, 3H); <sup>13</sup>C NMR (100 MHz, CDCl<sub>3</sub>) δ 173.9, 172.4, 167.3, 166.5, 157.8, 141.0, 132.9, 131.3, 131.0, 127.0, 125.2, 123.3, 121.0, 120.4, 110.9, 110.6, 105.6, 86.2, 57.9, 55.4, 52.9, 52.0; HRMS (ESI): *m/z* calcd for C<sub>22</sub>H<sub>20</sub>N<sub>2</sub>NaO<sub>7</sub> [M+Na]<sup>+</sup> 447.1168, Found 447.1159.

**Dimethyl 2-(4'-(furan-2-yl)-2-oxo-5'H-spiro[indoline-3,2'-oxazol]-5'-yl)malonate (3ka)**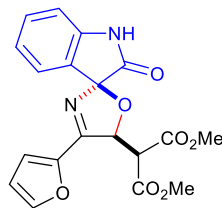

Prepared according to general procedure to afford **3ka** (44 mg, 57% yield) as a white solid; m.p. 205–207 °C; <sup>1</sup>H NMR (400 MHz, DMSO-*d*<sub>6</sub>) δ 10.77 (s, 1H), 8.05 (d, *J* = 1.2 Hz, 1H), 7.46–7.41 (m, 2H), 7.33–7.32 (m, 1H), 7.14–7.10 (m, 1H), 6.99 (d, *J* = 7.8 Hz, 1H), 6.81–6.79 (m, 1H), 5.92 (d, *J* = 3.1 Hz, 1H), 4.72 (d, *J* = 3.1 Hz, 1H), 3.77 (s, 3H), 3.71 (s, 3H); <sup>13</sup>C NMR (100 MHz, DMSO-*d*<sub>6</sub>) δ 173.6, 167.2, 166.7, 161.1, 147.5, 145.9, 143.0, 131.8, 126.7, 126.1, 122.9, 116.6, 113.1, 111.0, 105.9, 83.9, 54.0, 53.2, 52.9; HRMS (ESI): *m/z* calcd for C<sub>19</sub>H<sub>16</sub>N<sub>2</sub>NaO<sub>7</sub> [M+Na]<sup>+</sup> 407.0855, Found 407.0847.

**Dimethyl 2-(2-oxo-4'-(thiophen-2-yl)-5'H-spiro[indoline-3,2'-oxazol]-5'-yl)malonate (3la)**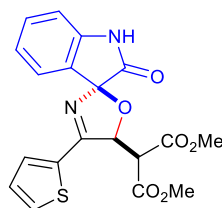

Prepared according to general procedure to afford **3la** (49 mg, 61% yield) as a white solid; m.p. 240–241 °C; <sup>1</sup>H NMR (400 MHz, DMSO-*d*<sub>6</sub>) δ 10.68 (s, 1H), 7.89–7.86 (m, 2H), 7.39–7.31 (m, 2H), 7.24–7.22 (m, 1H), 7.07 (t, *J* = 7.5 Hz, 1H), 6.92 (d, *J* = 7.8 Hz, 1H), 6.00 (d, *J* = 3.0 Hz, 1H), 4.66 (d, *J* = 3.0 Hz, 1H), 3.70 (s, 3H), 3.60 (s, 3H); <sup>13</sup>C NMR (100 MHz, DMSO-*d*<sub>6</sub>) δ 173.7, 167.2, 166.8, 165.6, 143.0, 133.8, 132.7, 132.1, 131.8, 128.9, 126.7, 126.2, 122.9, 111.0, 105.4, 84.1, 54.2, 53.1, 52.8; HRMS (ESI): *m/z* calcd for C<sub>19</sub>H<sub>16</sub>N<sub>2</sub>NaO<sub>6</sub>S [M+Na]<sup>+</sup> 423.0627, Found 423.0625.

**Dimethyl 2-(4'-([1,1'-biphenyl]-4-yl)-2-oxo-5'H-spiro[indoline-3,2'-oxazol]-5'-yl)malonate (3ma)**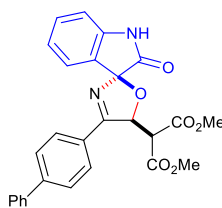

Prepared according to general procedure to afford **3ma** (70 mg, 75% yield) as a yellow solid; m.p. 215–216 °C; <sup>1</sup>H NMR (400 MHz, CDCl<sub>3</sub>) δ 8.80 (s, 1H), 7.72 (d, *J* = 7.9 Hz, 2H), 7.57 (d, *J* = 8.0 Hz, 2H), 7.51 (d, *J* = 7.4 Hz, 2H), 7.36–7.33 (m, 3H), 7.29–7.26 (m, 1H), 7.16–7.12 (m, 1H), 6.96–6.93 (m, 1H), 6.75 (d, *J* = 7.7 Hz, 1H), 6.25 (s, 1H), 4.09 (d, *J* = 3.1 Hz, 1H), 3.61 (s, 3H), 3.57 (s, 3H); <sup>13</sup>C NMR (100 MHz, CDCl<sub>3</sub>) δ 174.4, 172.2, 167.0, 166.2, 144.4, 141.7, 139.9, 131.3, 129.5, 128.9, 128.5, 128.1, 127.5, 127.2, 126.6, 126.1, 123.3,

110.9, 106.6, 84.3, 54.9, 52.9, 52.7; HRMS (ESI):  $m/z$  calcd for  $C_{27}H_{22}N_2NaO_6$   $[M+Na]^+$  493.1376, Found 493.1373.

**Dimethyl 2-(5-methyl-2-oxo-4'-phenyl-5'H-spiro[indoline-3,2'-oxazol]-5'-yl)malonate (3ab)**

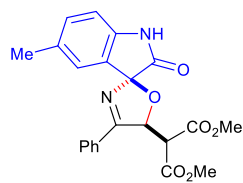

Prepared according to general procedure to afford **3ab** (67 mg, 82% yield) as a pale sticky oil;  $^1H$  NMR (400 MHz,  $DMSO-d_6$ )  $\delta$  9.82 (s, 1H), 7.66–7.64 (m, 2H), 7.52–7.48 (m, 4H), 7.43–7.42 (m, 2H), 4.16 (d,  $J = 6.3$  Hz, 1H), 3.99 (d,  $J = 6.3$  Hz, 1H), 3.78 (s, 3H), 3.62 (s, 3H), 2.97 (s, 3H);  $^{13}C$  NMR (100 MHz,  $DMSO-d_6$ )  $\delta$  171.2, 171.0, 170.5, 164.4, 163.9, 152.7, 141.1, 133.5, 130.8, 129.2, 129.0, 128.7, 128.6, 125.9, 125.2, 92.9, 56.0, 54.6, 53.5, 53.0, 52.4; HRMS (ESI):  $m/z$  calcd for  $C_{22}H_{20}N_2NaO_6$   $[M+Na]^+$  431.1219, Found 431.1216.

**Dimethyl 2-(5-methoxy-2-oxo-4'-phenyl-5'H-spiro[indoline-3,2'-oxazol]-5'-yl)malonate (3ac)**

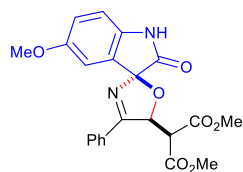

Prepared according to general procedure to afford **3ac** (67 mg, 79% yield) as a pale sticky oil;  $^1H$  NMR (400 MHz,  $CDCl_3$ )  $\delta$  8.53 (s, 1H), 7.65–7.63 (m, 2H), 7.42–7.34 (m, 3H), 7.01 (d,  $J = 2.4$  Hz, 1H), 6.73–6.66 (m, 2H), 6.21 (d,  $J = 3.5$  Hz, 1H), 4.04 (d,  $J = 3.6$  Hz, 1H), 3.69 (s, 3H), 3.63 (s, 3H), 3.57 (s, 3H);  $^{13}C$  NMR (100 MHz,  $CDCl_3$ )  $\delta$  174.2, 172.5, 166.9, 166.0, 156.4, 134.7, 131.6, 130.6, 128.8, 128.0, 127.6, 116.3, 112.8, 111.3, 106.8, 84.3, 55.8, 54.7, 52.9, 52.7; HRMS (ESI):  $m/z$  calcd for  $C_{22}H_{20}N_2NaO_7$   $[M+Na]^+$  447.1168, Found 447.1165.

**Dimethyl 2-(5-nitro-2-oxo-4'-phenyl-5'H-spiro[indoline-3,2'-oxazol]-5'-yl)malonate (3ad)**

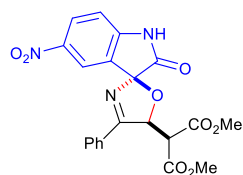

Prepared according to general procedure to afford **3ad** (60 mg, 68% yield) as a white solid; m.p. 163–165 °C;  $^1H$  NMR (400 MHz,  $DMSO-d_6$ )  $\delta$  11.48 (s, 1H), 8.37–8.29 (m, 2H), 7.72 (s, 2H), 7.52–7.44 (m, 3H), 7.13 (s, 1H), 6.51 (s, 1H), 4.16 (s, 1H), 3.66 (s, 3H), 3.20 (s, 3H);  $^{13}C$  NMR (100 MHz,  $DMSO-d_6$ )  $\delta$  173.9, 173.6, 166.7, 166.3, 148.6, 143.4, 132.4, 130.6, 129.4, 129.0, 128.9, 128.7, 128.5, 128.4, 121.8, 111.5, 105.9, 85.4, 58.1, 53.3, 52.7; HRMS (ESI):  $m/z$  calcd for  $C_{21}H_{17}N_3NaO_8$   $[M+Na]^+$  462.0913, Found 462.0908.

**Dimethyl 2-(6-fluoro-2-oxo-4'-phenyl-5'H-spiro[indoline-3,2'-oxazol]-5'-yl)malonate (3ae)**

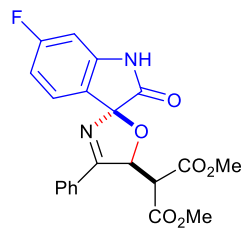

Prepared according to general procedure to afford **3ae** (59 mg, 71% yield) as a pale sticky oil;  $^1H$  NMR (400 MHz,  $CDCl_3$ )  $\delta$  8.43 (s, 1H), 7.77–7.75 (m, 2H), 7.52–7.44 (m, 3H), 7.19–7.16 (m, 1H), 6.74–6.63 (m, 2H), 6.35 (d,  $J = 9.0$  Hz, 1H), 4.44 (d,  $J = 9.0$  Hz, 1H), 3.77 (s, 3H), 3.16 (s, 3H);  $^{13}C$  NMR (101 MHz,  $CDCl_3$ )  $\delta$  173.8, 173.2, 167.2, 166.4, 165.8 ( $J_{C-F} = 247.3$  Hz), 142.8 ( $J_{C-F} = 12.3$  Hz), 132.1, 130.4, 128.7, 128.6, 126.9 ( $J_{C-F} = 10.3$  Hz), 122.3 ( $J_{C-F} = 2.9$  Hz), 110.0 ( $J_{C-F} = 22.6$  Hz), 106.4, 99.6 ( $J_{C-F} = 27.5$  Hz), 84.8, 58.7, 53.1, 52.3; HRMS (ESI):  $m/z$  calcd for  $C_{21}H_{17}FN_2NaO_6$   $[M+Na]^+$  435.0968, Found 435.0966.

**Dimethyl 2-(6-fluoro-4'-(3-methoxyphenyl)-2-oxo-5'H-spiro[indoline-3,2'-oxazol]-5'-yl)malonate (3he)**

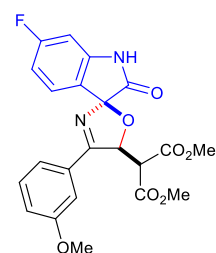

Prepared according to general procedure to afford **3he** (49 mg, 55% yield) as a pale sticky oil;  $^1H$  NMR (400 MHz,  $CDCl_3$ )  $\delta$  8.22 (s, 1H), 7.30–7.20 (m, 3H), 7.11–7.08 (m, 1H), 6.99–6.97 (m, 1H), 6.70–6.61 (m, 1H), 6.58–6.55 (m, 1H), 6.25 (d,  $J = 8.8$  Hz, 1H), 4.35 (d,  $J = 8.9$  Hz, 1H), 3.77 (s, 3H), 3.70 (s, 3H), 3.17 (s, 3H);  $^{13}C$  NMR (100 MHz,  $CDCl_3$ )  $\delta$  174.2, 172.6, 166.9, 166.1, 165.8 ( $J_{C-F} = 247.2$  Hz), 159.9, 143.2 ( $J_{C-F} = 12.6$  Hz), 131.7, 129.9, 128.0 ( $J_{C-F} = 10.1$  Hz), 122.1 ( $J_{C-F} = 2.9$  Hz), 120.2, 118.4, 112.6, 109.9 ( $J_{C-F} = 22.4$  Hz), 105.8, 99.5 ( $J_{C-F} = 27.4$  Hz), 84.3, 55.5, 54.5, 53.0, 52.7; HRMS (ESI):  $m/z$  calcd for

C<sub>22</sub>H<sub>19</sub>FN<sub>2</sub>NaO<sub>7</sub> [M+Na]<sup>+</sup> 465.1074, Found 465.1071.

**Dimethyl 2-(4'-([1,1'-biphenyl]-4-yl)-6-chloro-2-oxo-5'H-spiro[indoline-3,2'-oxazol]-5'-yl)malonate (3mf)**

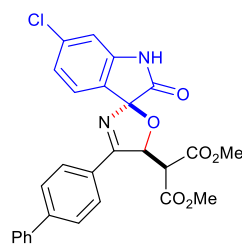

Prepared according to general procedure to afford **3mf** (81 mg, 80% yield) as a yellow solid; m.p. 215–216 °C; <sup>1</sup>H NMR (400 MHz, CDCl<sub>3</sub>) δ 7.98 (s, 1H), 7.74 (d, *J* = 8.2 Hz, 2H), 7.62 (d, *J* = 8.2 Hz, 2H), 7.56–7.54 (m, 2H), 7.41–7.30 (m, 4H), 6.99–6.97 (m, 1H), 6.81 (d, *J* = 1.7 Hz, 1H), 6.21 (d, *J* = 3.0 Hz, 1H), 4.09 (d, *J* = 3.4 Hz, 1H), 3.67 (s, 3H), 3.59 (s, 3H); <sup>13</sup>C NMR (100 MHz, CDCl<sub>3</sub>) δ 173.6, 172.4, 166.9, 166.0, 144.6, 142.5, 139.8, 136.9, 129.2, 128.9, 128.5, 128.2, 127.5, 127.2, 124.9, 123.5, 111.2, 105.8, 84.3, 54.5, 53.0, 52.8; HRMS (ESI): *m/z* calcd for C<sub>27</sub>H<sub>21</sub>ClN<sub>2</sub>NaO<sub>6</sub> [M+Na]<sup>+</sup> 527.0986, Found 527.0982.

**Dimethyl 2-(6-chloro-4'-(2-methoxyphenyl)-2-oxo-5'H-spiro[indoline-3,2'-oxazol]-5'-yl)malonate (3jf)**

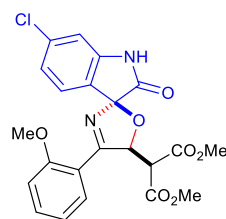

Prepared according to general procedure to afford **3jf** (52 mg, 58% yield) as a pale sticky oil; <sup>1</sup>H NMR (400 MHz, CDCl<sub>3</sub>) δ 8.17 (s, 1H), 7.74–7.72 (m, 1H), 7.41–7.36 (m, 1H), 7.09–7.07 (m, 1H), 6.97–6.93 (m, 3H), 6.79 (d, *J* = 1.7 Hz, 1H), 6.41 (d, *J* = 7.7 Hz, 1H), 4.20 (d, *J* = 7.7 Hz, 1H), 3.83 (s, 3H), 3.69 (s, 3H), 3.15 (s, 3H); <sup>13</sup>C NMR (101 MHz, CDCl<sub>3</sub>) δ 173.7, 172.7, 167.2, 166.5, 157.8, 142.2, 136.7, 133.2, 131.2, 126.2, 125.4, 123.3, 121.1, 120.2, 111.3, 110.9, 105.0, 86.3, 57.8, 55.4, 52.9, 52.1; HRMS (ESI): *m/z* calcd for C<sub>22</sub>H<sub>19</sub>ClN<sub>2</sub>NaO<sub>7</sub> [M+Na]<sup>+</sup> 481.0778, Found 481.0771.

**Dimethyl 2-(6-bromo-2-oxo-4'-phenyl-5'H-spiro[indoline-3,2'-oxazol]-5'-yl)malonate (3ag)**

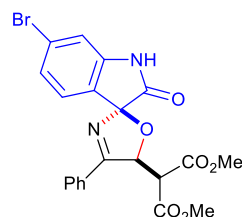

Prepared according to general procedure to afford **3ag** (72 mg, 76% yield) as a yellow solid; m.p. 187–189 °C; <sup>1</sup>H NMR (400 MHz, CDCl<sub>3</sub>) δ 7.84–7.81 (m, 2H), 7.69–7.67 (m, 2H), 7.41 (s, 1H), 7.27–7.23 (m, 1H), 7.14 (d, *J* = 7.4 Hz, 1H), 7.00–6.97 (m, 1H), 6.82 (d, *J* = 7.8 Hz, 1H), 6.28 (d, *J* = 8.5 Hz, 1H), 4.36 (d, *J* = 8.5 Hz, 1H), 3.70 (s, 3H), 3.19 (s, 3H); <sup>13</sup>C NMR (100 MHz, CDCl<sub>3</sub>) δ 172.4, 171.5, 166.8, 166.3, 140.8, 134.6, 132.3, 131.5, 129.3, 126.2, 125.3, 123.6, 115.4, 110.6, 84.8, 58.4, 53.2, 52.4; HRMS (ESI): *m/z* calcd for C<sub>21</sub>H<sub>17</sub>BrN<sub>2</sub>NaO<sub>6</sub> [M+Na]<sup>+</sup> 495.0168, Found 495.0159.

**Dimethyl 2-(6-bromo-4'-(2-methoxyphenyl)-2-oxo-5'H-spiro[indoline-3,2'-oxazol]-5'-yl)malonate (3jg)**

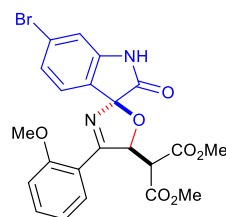

Prepared according to general procedure to afford **3jg** (60 mg, 60% yield) as a pale sticky oil; <sup>1</sup>H NMR (400 MHz, CDCl<sub>3</sub>) δ 7.83 (s, 1H), 7.74 (d, *J* = 7.7 Hz, 1H), 7.40–7.36 (m, 1H), 7.19 (d, *J* = 1.8 Hz, 1H), 7.10–7.08 (m, 1H), 7.04–7.02 (m, 1H), 6.97–6.94 (m, 1H), 6.89 (d, *J* = 8.4 Hz, 1H), 6.41–6.39 (m, 1H), 4.20–4.18 (m, 1H), 3.83 (d, *J* = 1.5 Hz, 3H), 3.69 (d, *J* = 1.7 Hz, 3H), 3.14 (d, *J* = 1.7 Hz, 3H); <sup>13</sup>C NMR (100 MHz, CDCl<sub>3</sub>) δ 173.4, 172.7, 167.2, 166.5, 157.8, 142.1, 133.1, 131.2, 126.5, 126.2, 125.9, 124.6, 121.1, 120.2, 113.9, 110.9, 104.9, 86.3, 57.8, 55.4, 52.9, 52.1; HRMS (ESI): *m/z* calcd for C<sub>22</sub>H<sub>19</sub>BrN<sub>2</sub>NaO<sub>7</sub> [M+Na]<sup>+</sup> 525.0273, Found 525.0268.

**Dimethyl 2-(7-methyl-2-oxo-4'-phenyl-5'-H-spiro[indoline-3,2'-oxazol]-5'-yl)malonate (3ah)**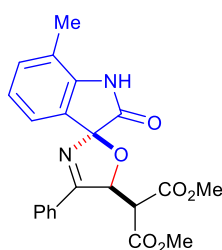

Prepared according to general procedure to afford **3ah** (69 mg, 85% yield) as a pale sticky oil;  $^1\text{H NMR}$  (400 MHz,  $\text{CDCl}_3$ )  $\delta$  8.77 (s, 1H), 7.65 (d,  $J = 7.0$  Hz, 2H), 7.41–7.34 (m, 3H), 7.21–7.17 (m, 1H), 7.05–7.03 (m, 1H), 6.92–6.88 (m, 1H), 6.21 (d,  $J = 3.8$  Hz, 1H), 4.03 (d,  $J = 3.8$  Hz, 1H), 3.60 (s, 3H), 3.57 (s, 3H), 2.14 (s, 3H);  $^{13}\text{C NMR}$  (100 MHz,  $\text{CDCl}_3$ )  $\delta$  174.6, 172.4, 166.9, 166.1, 140.1, 132.5, 131.6, 130.7, 128.8, 128.0, 126.1, 123.3, 123.2, 120.1, 106.9, 84.3, 55.0, 52.9, 52.7, 16.1; HRMS (ESI):  $m/z$  calcd for  $\text{C}_{22}\text{H}_{20}\text{N}_2\text{NaO}_6$   $[\text{M}+\text{Na}]^+$  431.1219, Found 431.1205.

**Dimethyl 2-(2-oxo-4'-phenyl-7-(trifluoromethyl)-5'-H-spiro[indoline-3,2'-oxazol]-5'-yl)malonate (3ai)**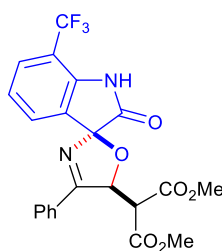

Prepared according to general procedure to afford **3ai** (68 mg, 74% yield) as a yellow solid; m.p. 218–220 °C;  $^1\text{H NMR}$  (400 MHz,  $\text{CDCl}_3$ )  $\delta$  7.79 (s, 1H), 7.66–7.62 (m, 3H), 7.47–7.36 (m, 4H), 7.12 (t,  $J = 7.7$  Hz, 1H), 6.21 (d,  $J = 3.5$  Hz, 1H), 4.06 (d,  $J = 3.5$  Hz, 1H), 3.66 (s, 3H), 3.56 (s, 3H);  $^{13}\text{C NMR}$  (100 MHz,  $\text{CDCl}_3$ )  $\delta$  173.1, 172.8, 166.7, 166.0, 138.9 (d,  $J = 1.9$  Hz), 131.9, 130.3, 130.1, 128.9, 128.1, 127.9, 127.8 (q,  $J = 4.0$  Hz), 125.0 (q,  $J = 270.3$  Hz), 123.3, 112.9 (q,  $J = 33.1$  Hz), 104.8, 84.5, 54.3, 53.0, 52.7; HRMS (ESI):  $m/z$  calcd for  $\text{C}_{22}\text{H}_{17}\text{F}_3\text{N}_2\text{NaO}_6$   $[\text{M}+\text{Na}]^+$  485.0936, Found 485.0928.

**Dimethyl 2-(4-chloro-4'-(2-methoxyphenyl)-2-oxo-5'-H-spiro[indoline-3,2'-oxazol]-5'-yl)malonate (3jj)**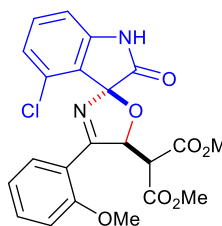

Prepared according to general procedure to afford **3jj** (67 mg, 73% yield) as a pale sticky oil; dr = 4:1; Major diastereomer:  $^1\text{H NMR}$  (400 MHz,  $\text{CDCl}_3$ )  $\delta$  8.16 (s, 1H), 7.75–7.72 (m, 1H), 7.40–7.33 (m, 1H), 7.17–7.08 (m, 1H), 6.97–6.92 (m, 1H), 6.89–6.85 (m, 2H), 6.73–6.68 (m, 1H), 6.42–6.38 (m, 1H), 4.11 (d,  $J = 6.6$  Hz, 1H), 3.81 (m, 3H), 3.69 (m, 3H), 3.27 (m, 3H);  $^{13}\text{C NMR}$  (100 MHz,  $\text{CDCl}_3$ )  $\delta$  173.6, 172.8, 166.9, 166.8, 157.9, 142.6, 133.0, 132.4, 132.0, 131.2, 124.2, 123.7, 121.1, 120.2, 111.1, 109.0, 105.3, 87.0, 56.9, 55.6, 52.9, 52.3; HRMS (ESI):  $m/z$  calcd for  $\text{C}_{22}\text{H}_{19}\text{ClN}_2\text{NaO}_7$   $[\text{M}+\text{Na}]^+$  481.0778, Found 481.0776.



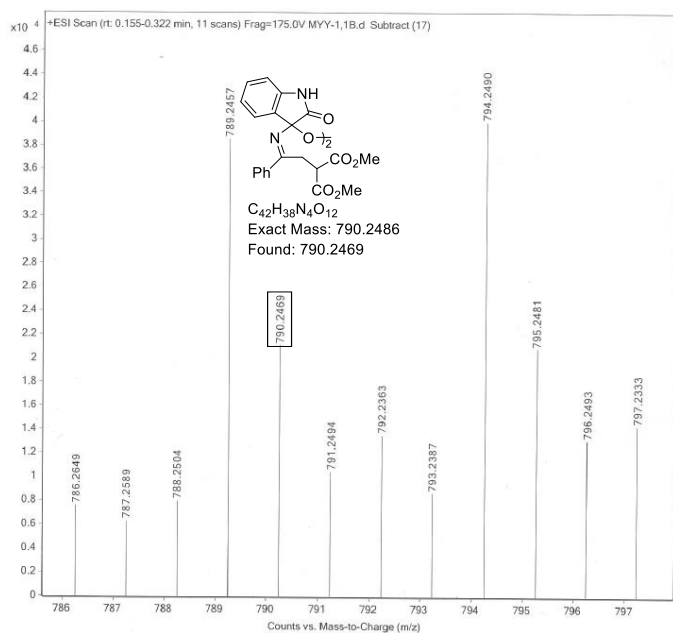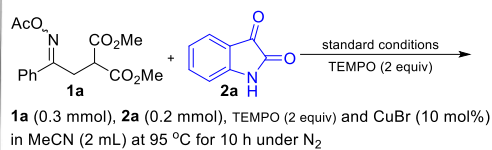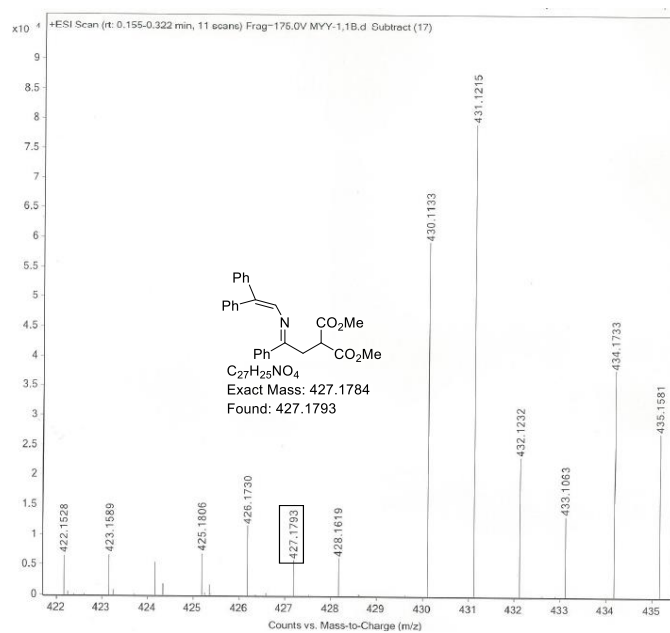

## NMR spectra of compounds

Dimethyl 2-(2-oxo-4'-phenyl-5'H-spiro[indoline-3,2'-oxazol]-5'-yl)malonate (3aa)

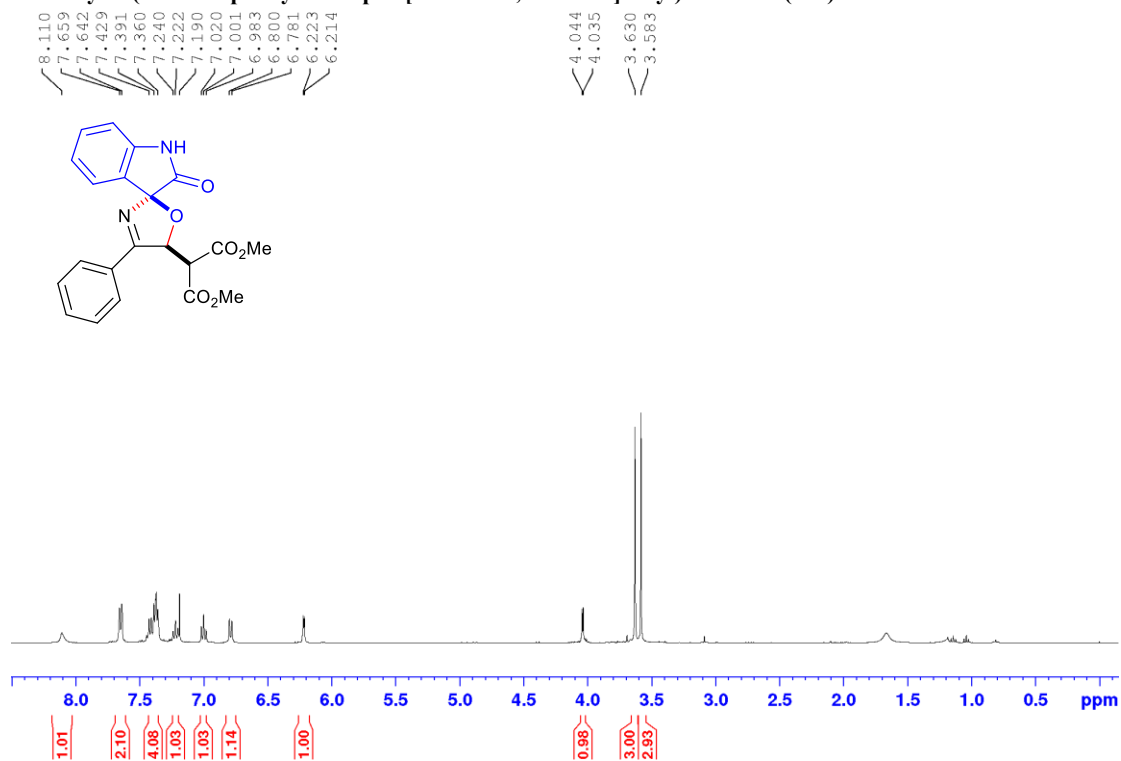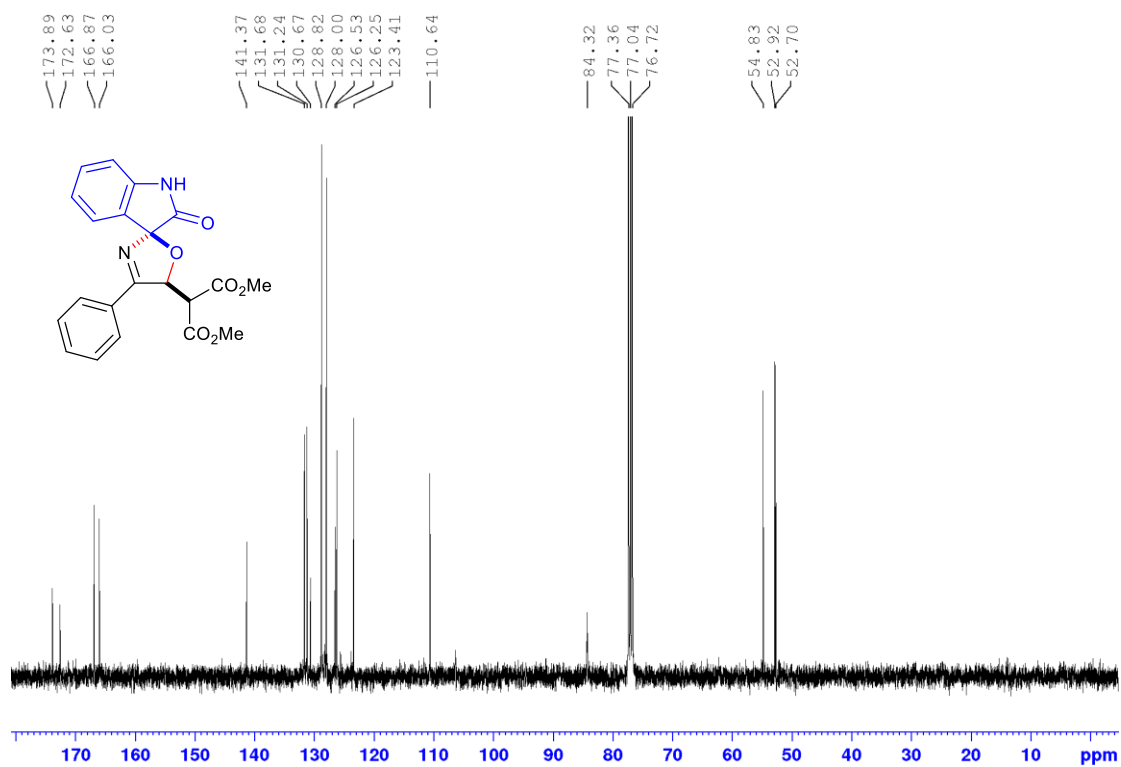

**Dimethyl 2-(4'-(4-chlorophenyl)-2-oxo-5'H-spiro[indoline-3,2'-oxazol]-5'-yl)malonat (3ba)**

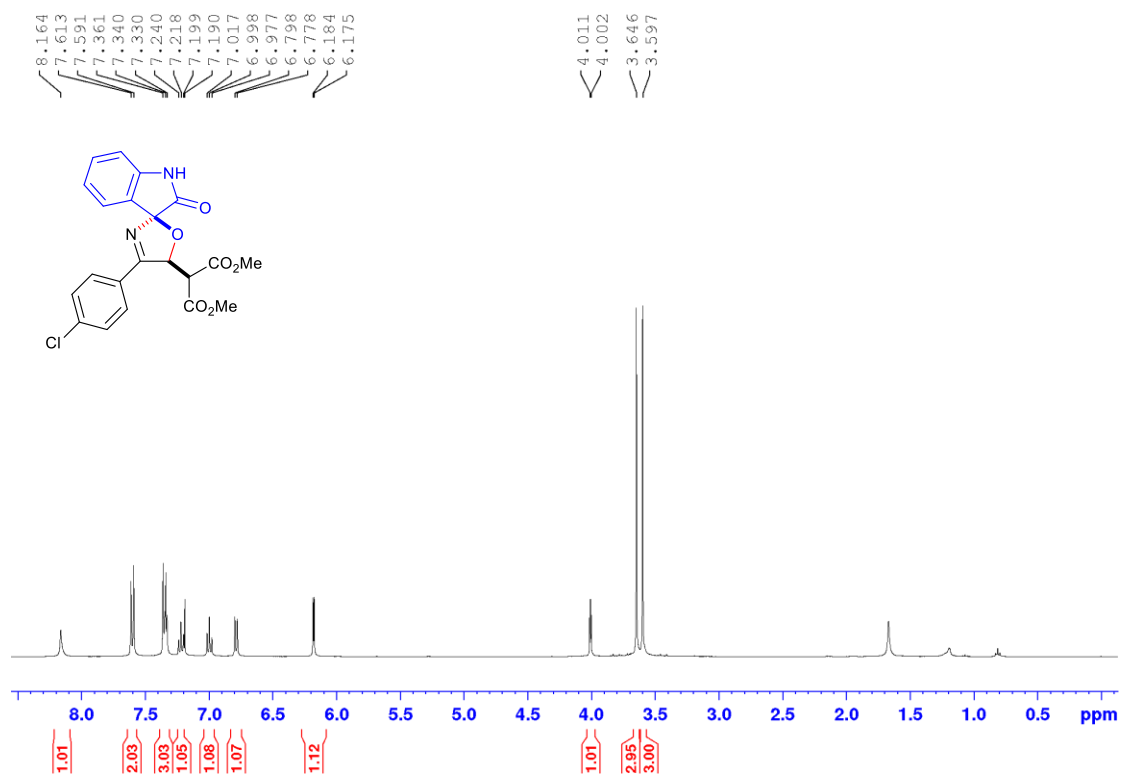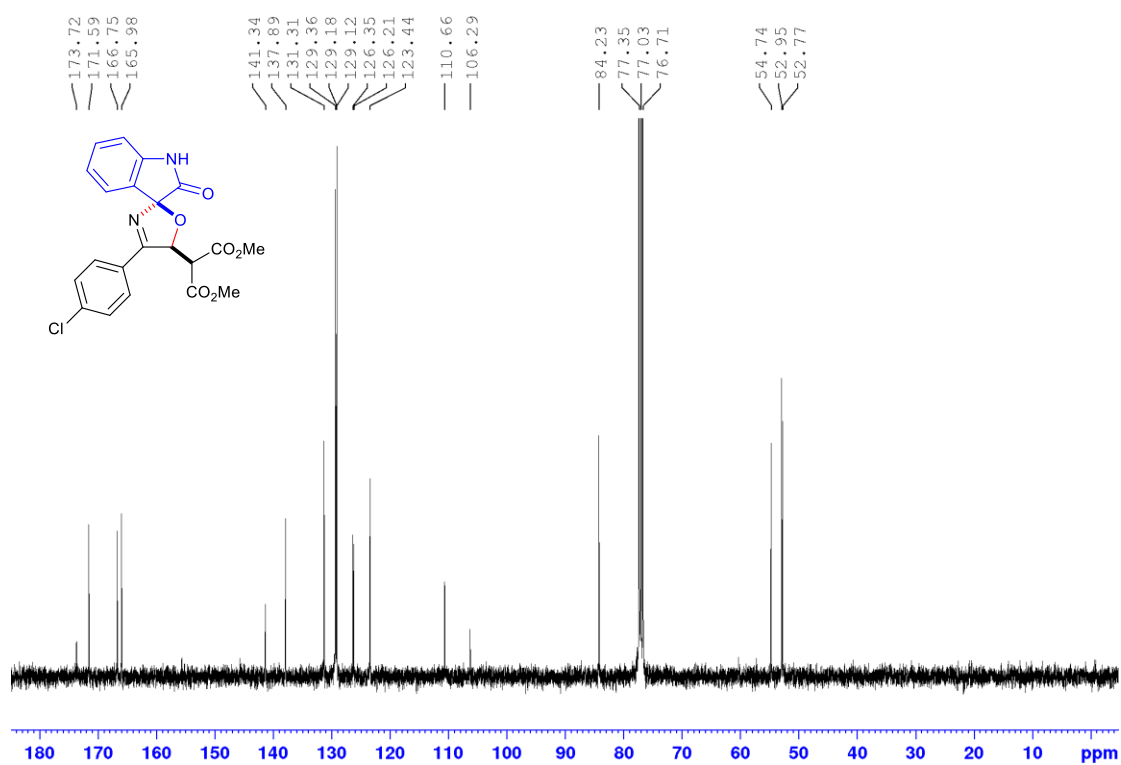

Dimethyl 2-(4'-(4-bromophenyl)-2-oxo-5'H-spiro[indoline-3,2'-oxazol]-5'-yl)malonate (3ca)

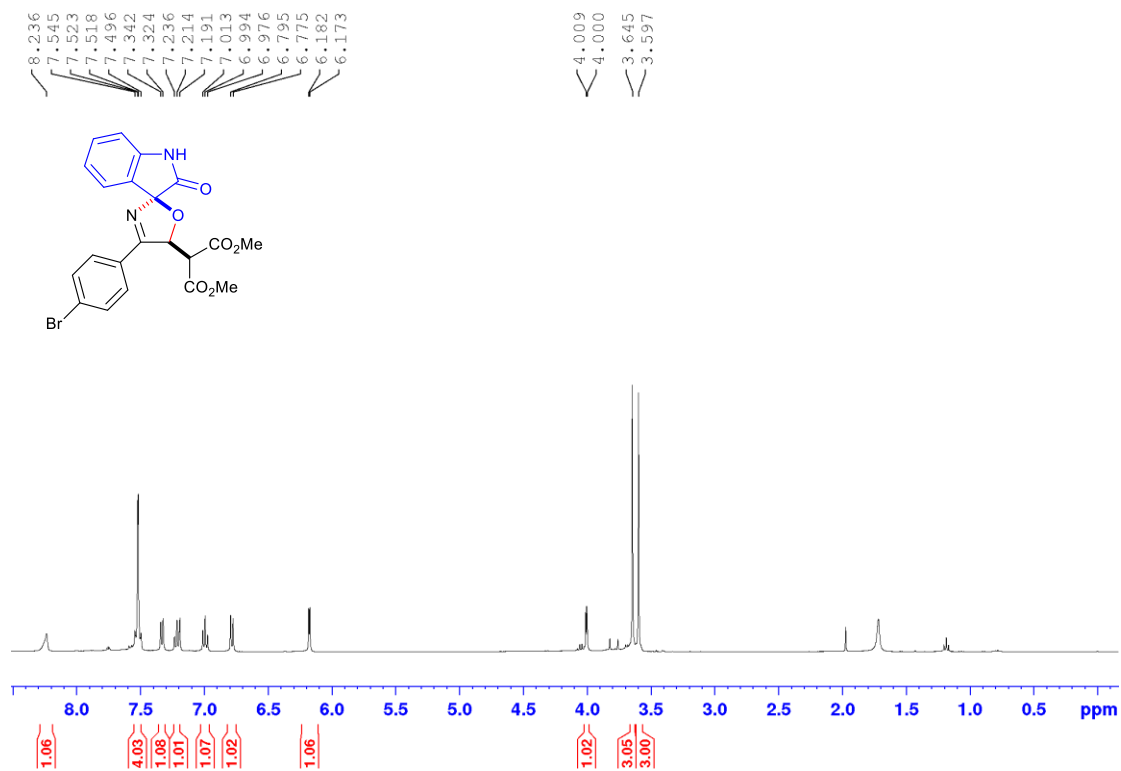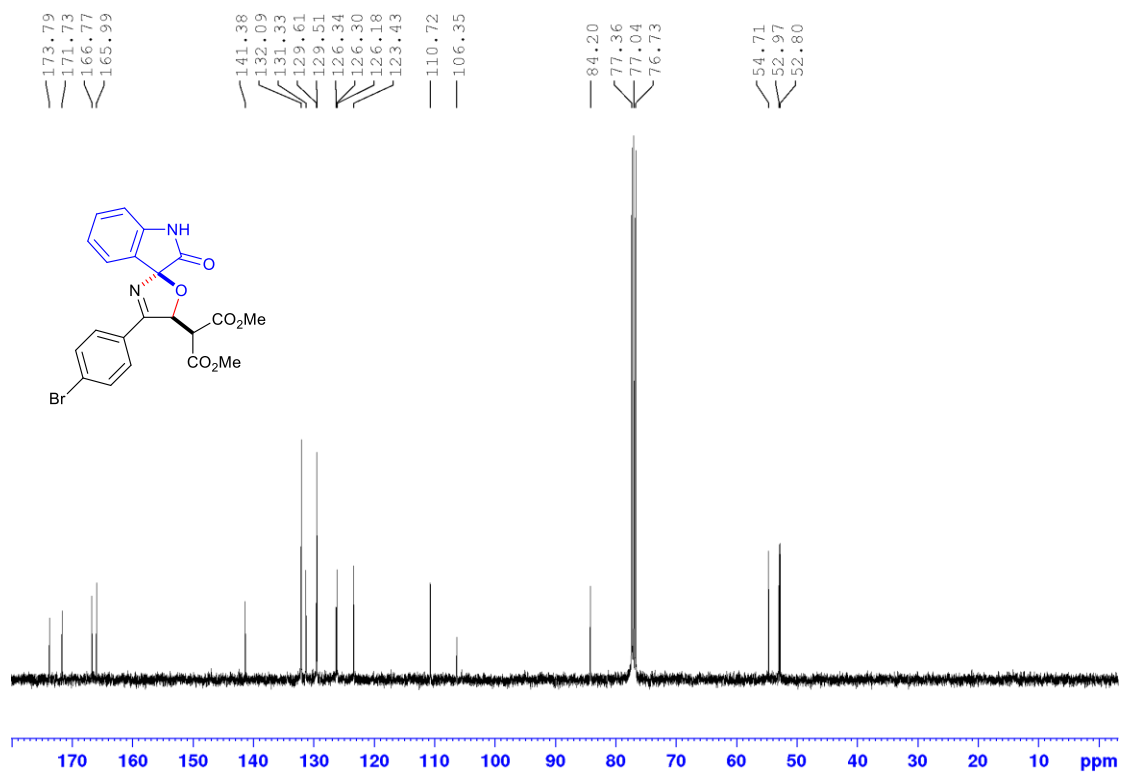

**Dimethyl 2-(4'-(4-cyanophenyl)-2-oxo-5'H-spiro[indoline-3,2'-oxazol]-5'-yl)malonate (3da)**

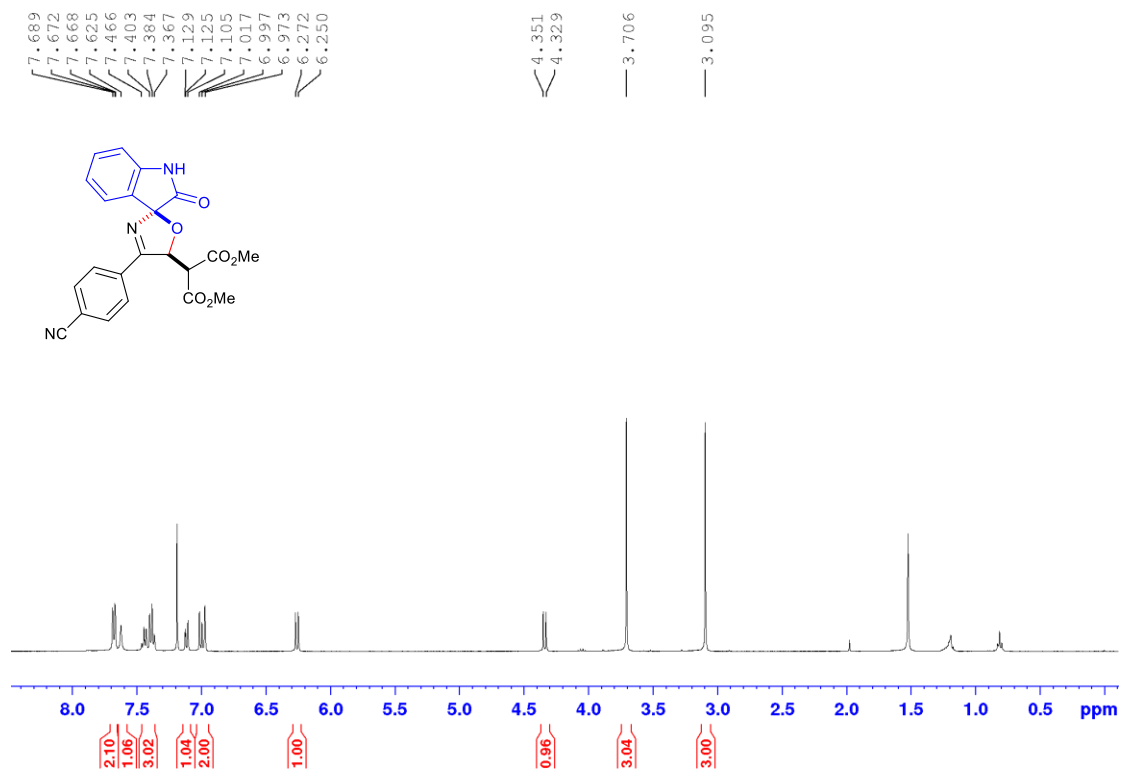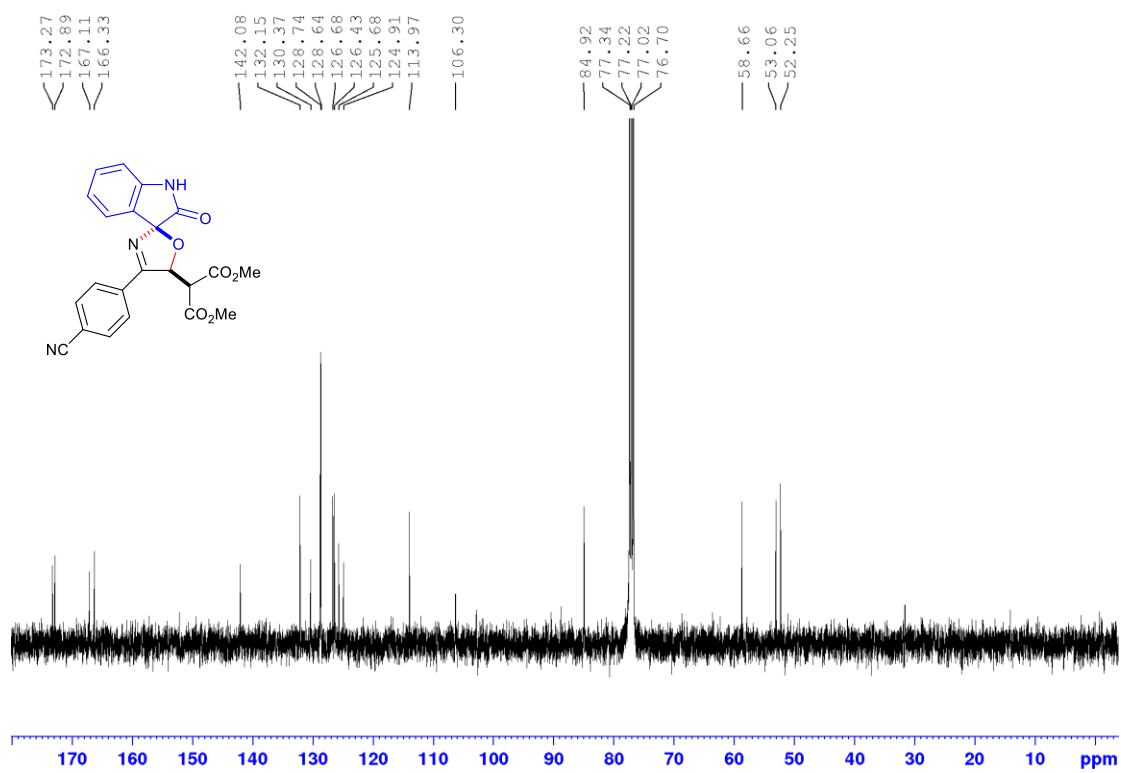

**Dimethyl 2-(2-oxo-4'-(p-tolyl)-5'H-spiro[indoline-3,2'-oxazol]-5'-yl)malonate (3ea)**

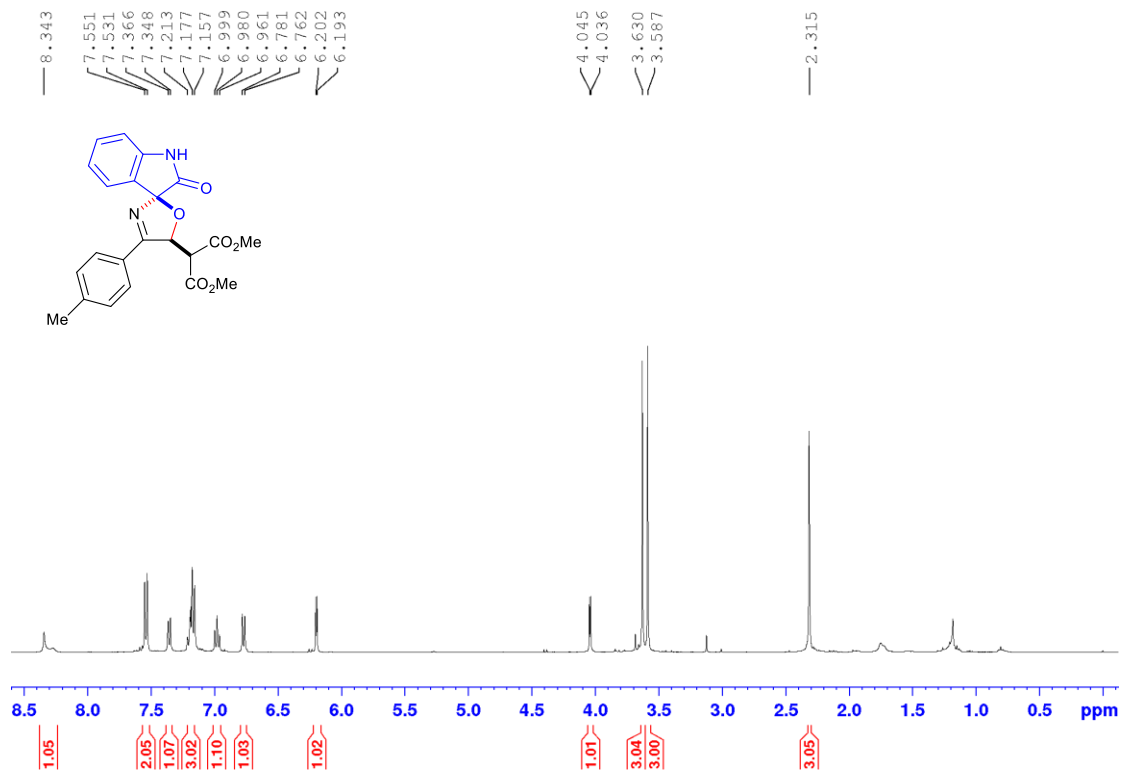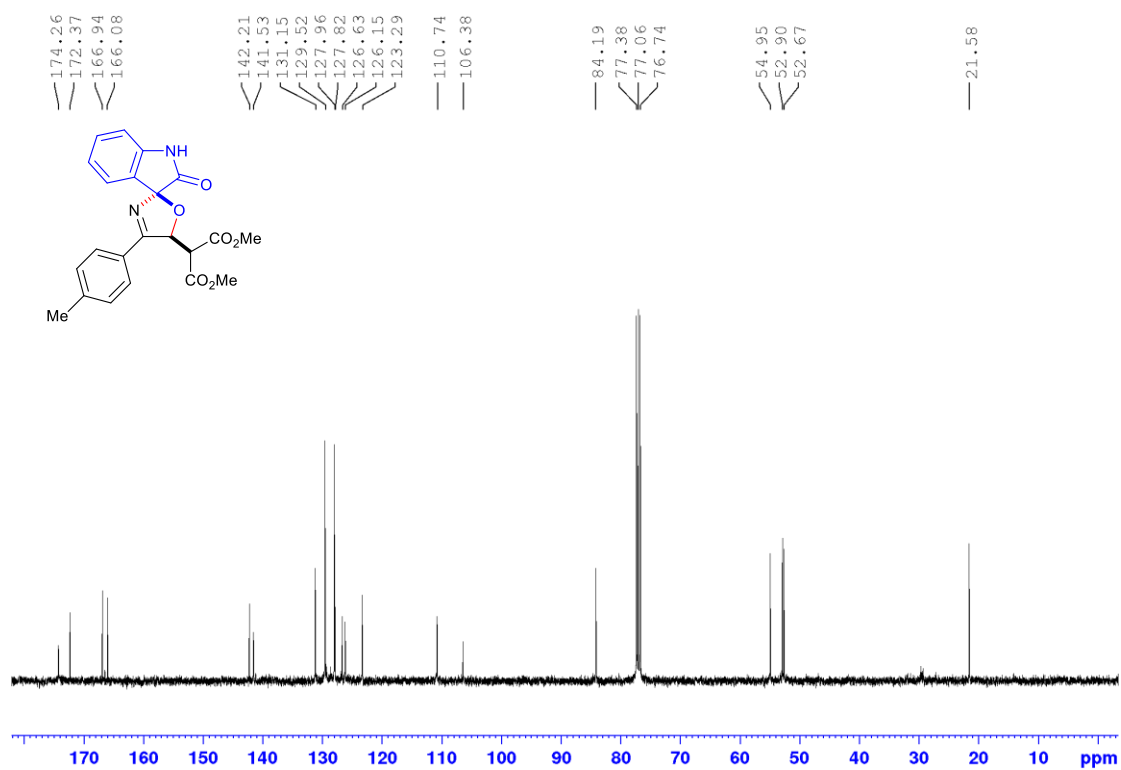

Dimethyl 2-(4'-(4-methoxyphenyl)-2-oxo-5'H-spiro[indoline-3,2'-oxazol]-5'-yl)malonate (3fa)

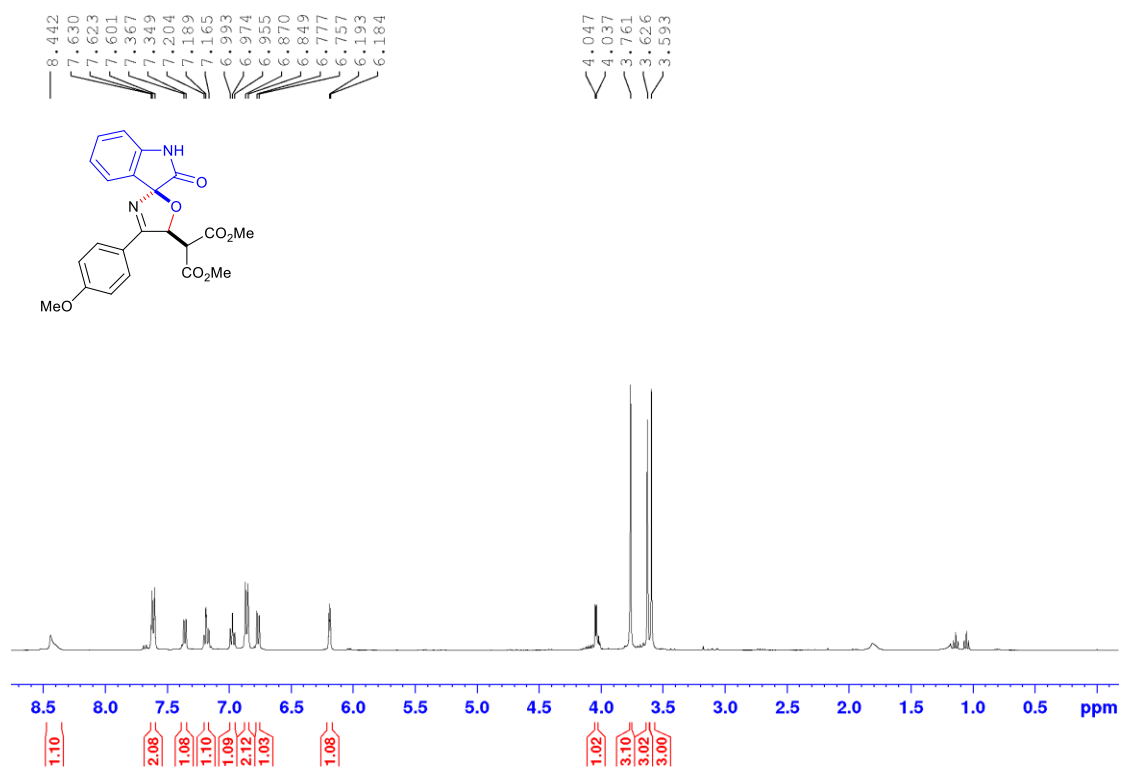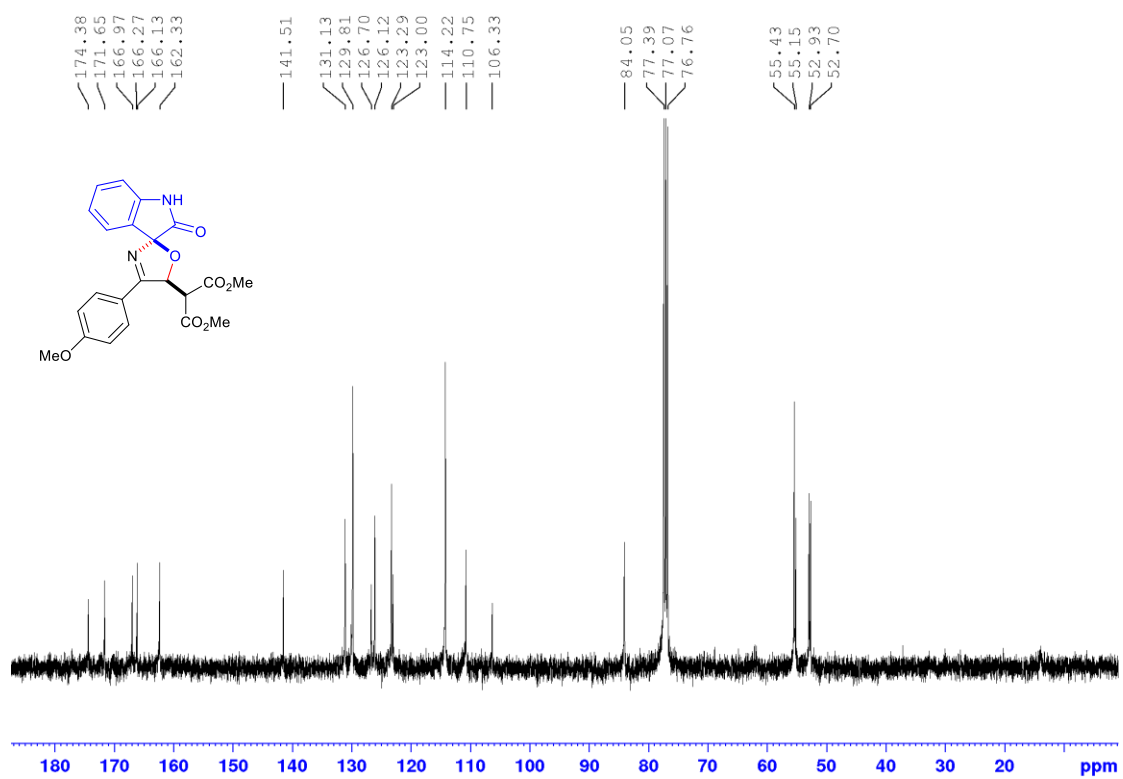

Dimethyl 2-(4'-(3-bromophenyl)-2-oxo-5'H-spiro[indoline-3,2'-oxazol]-5'-yl)malonate (3ga)

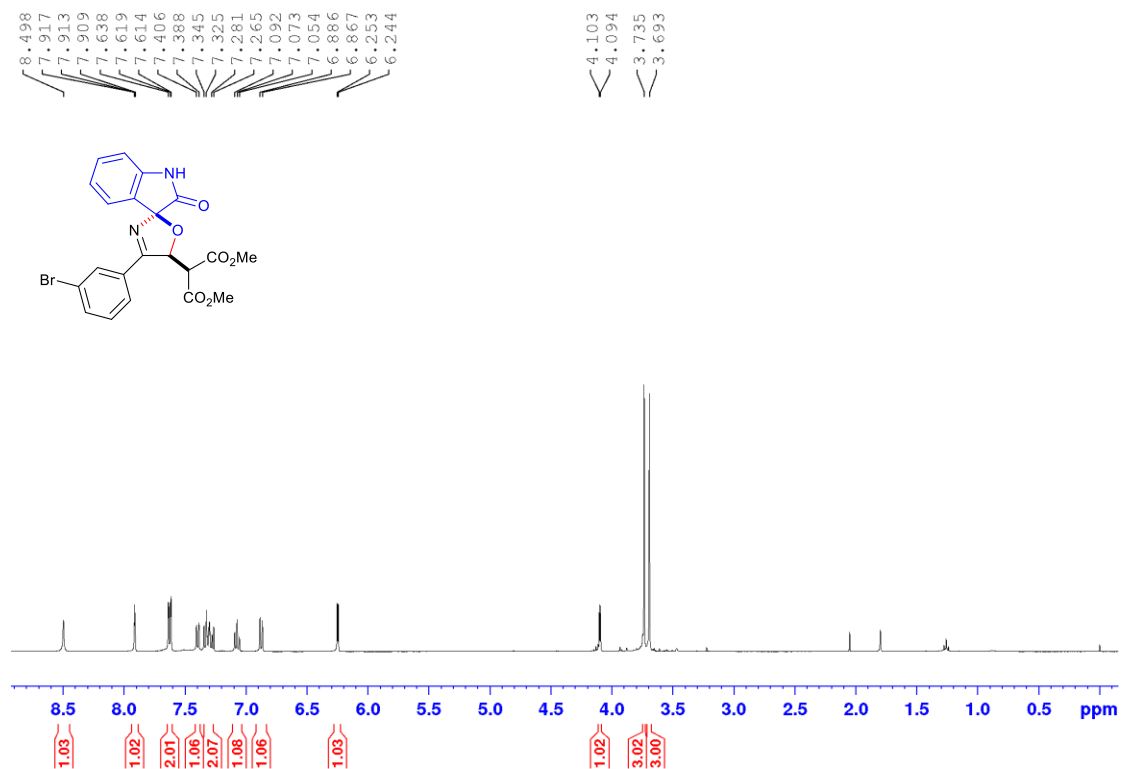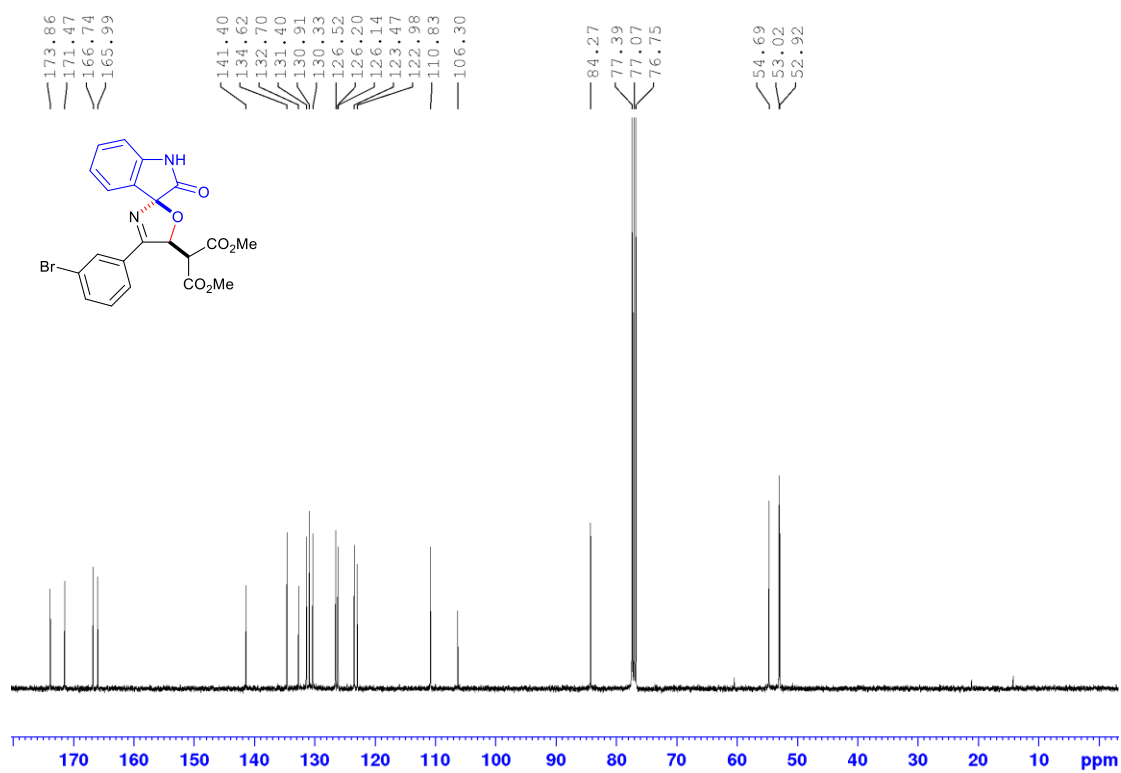



Dimethyl 2-(4'-(3-methoxyphenyl)-2-oxo-5'H-spiro[indoline-3,2'-oxazol]-5'-yl)malonate (3ha)

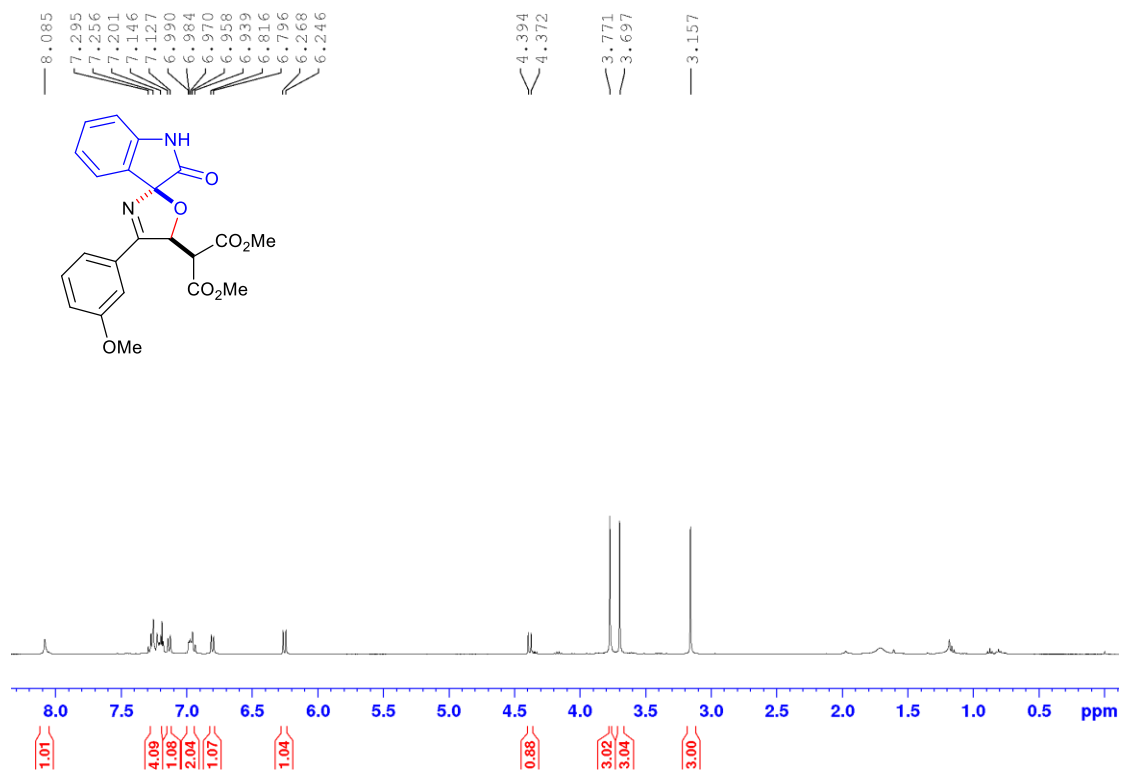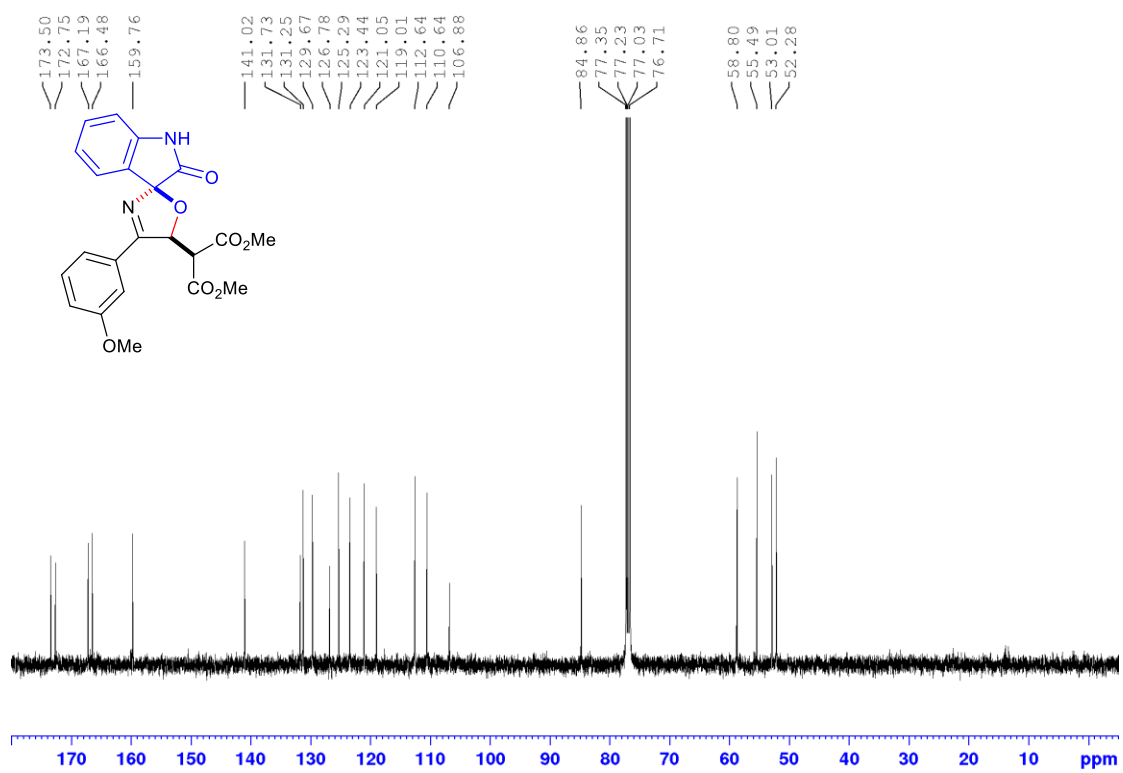

Dimethyl 2-(4'-(2-chlorophenyl)-2-oxo-5'H-spiro[indoline-3,2'-oxazol]-5'-yl)malonate (3ia)

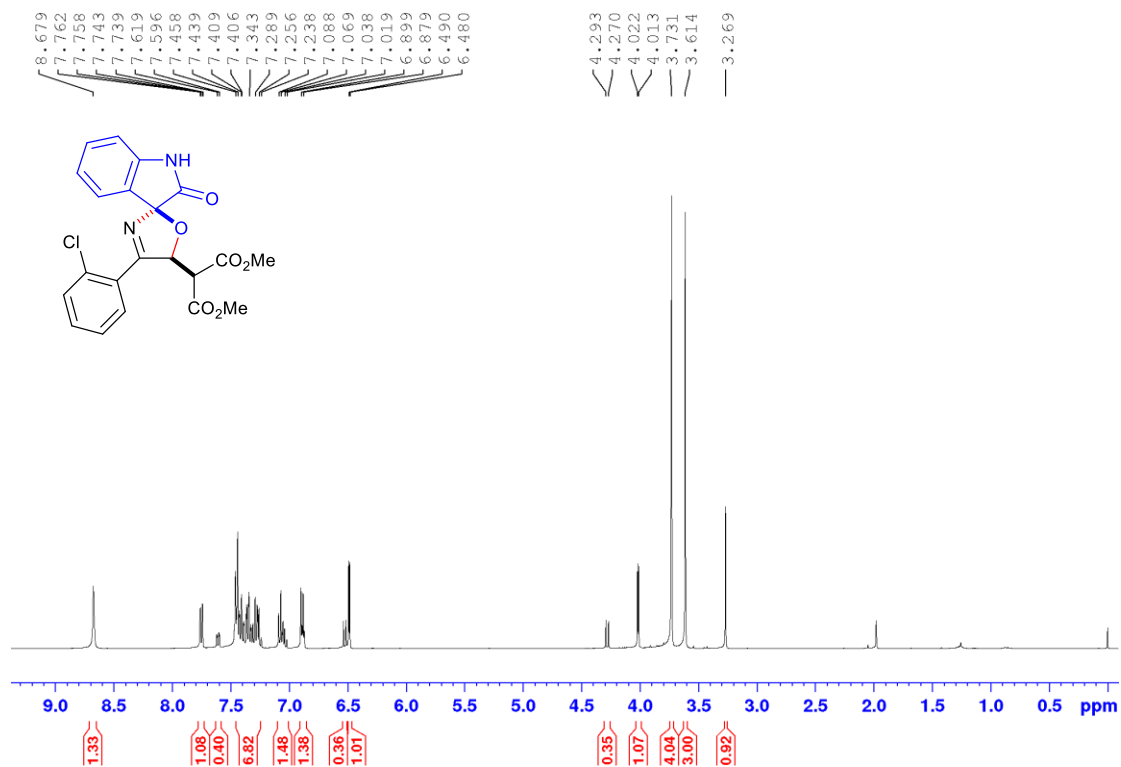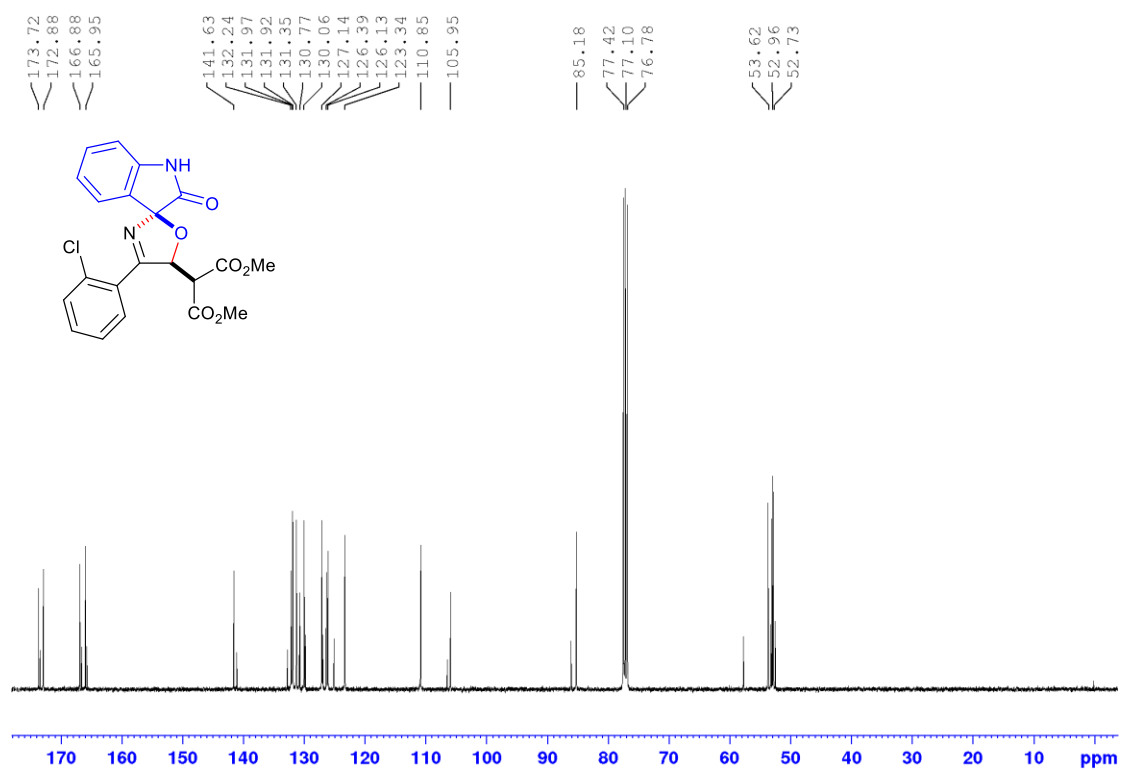

Dimethyl 2-(4'-(2-methoxyphenyl)-2-oxo-5'H-spiro[indoline-3,2'-oxazol]-5'-yl)malonate (3ja)

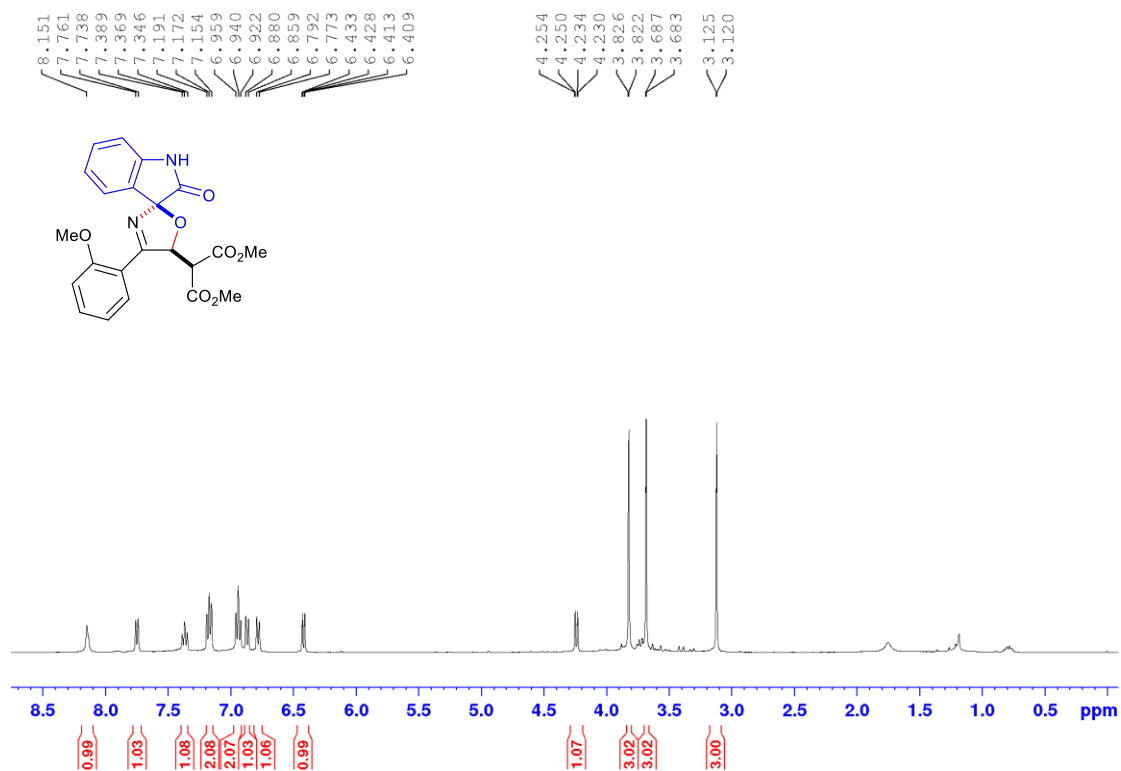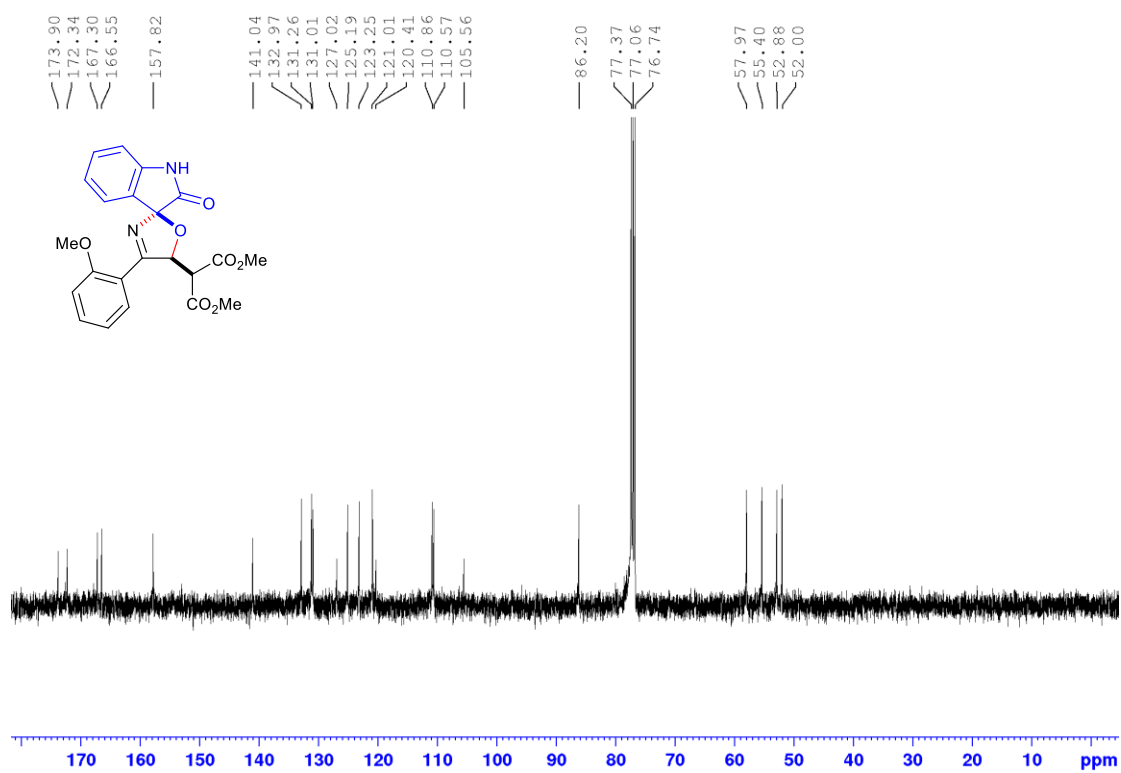

Dimethyl 2-(4'-(furan-2-yl)-2-oxo-5'H-spiro[indoline-3,2'-oxazol]-5'-yl)malonate (3ka)

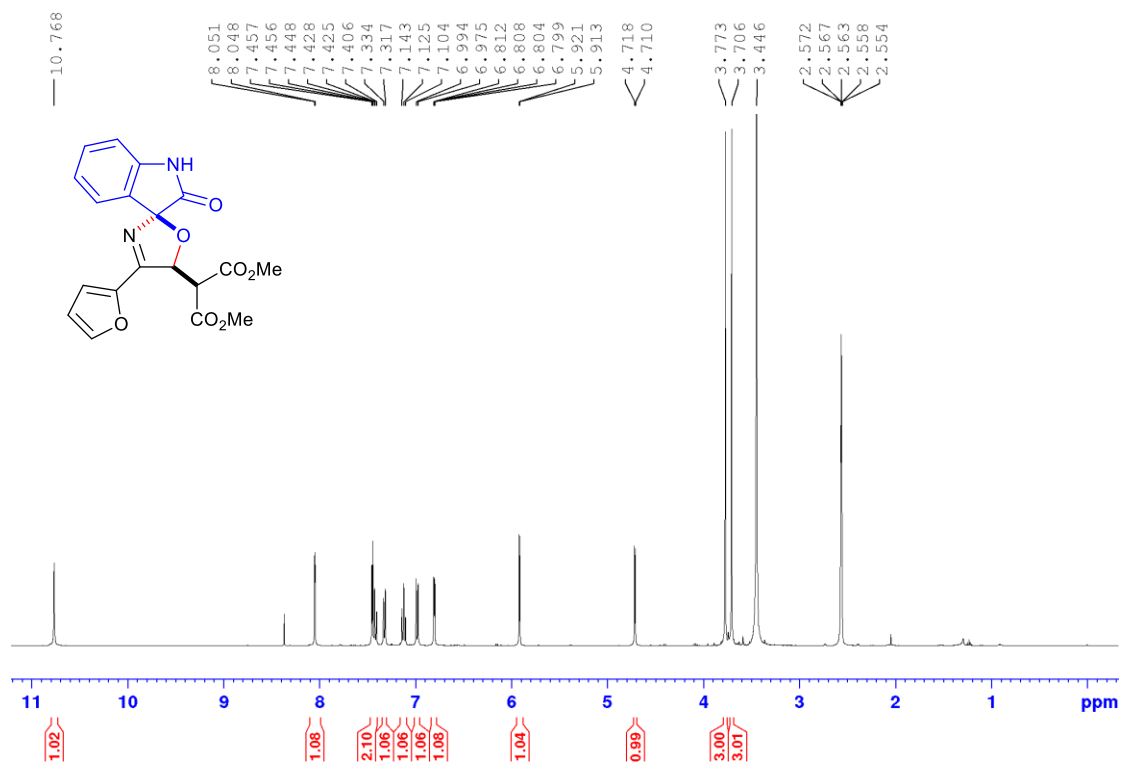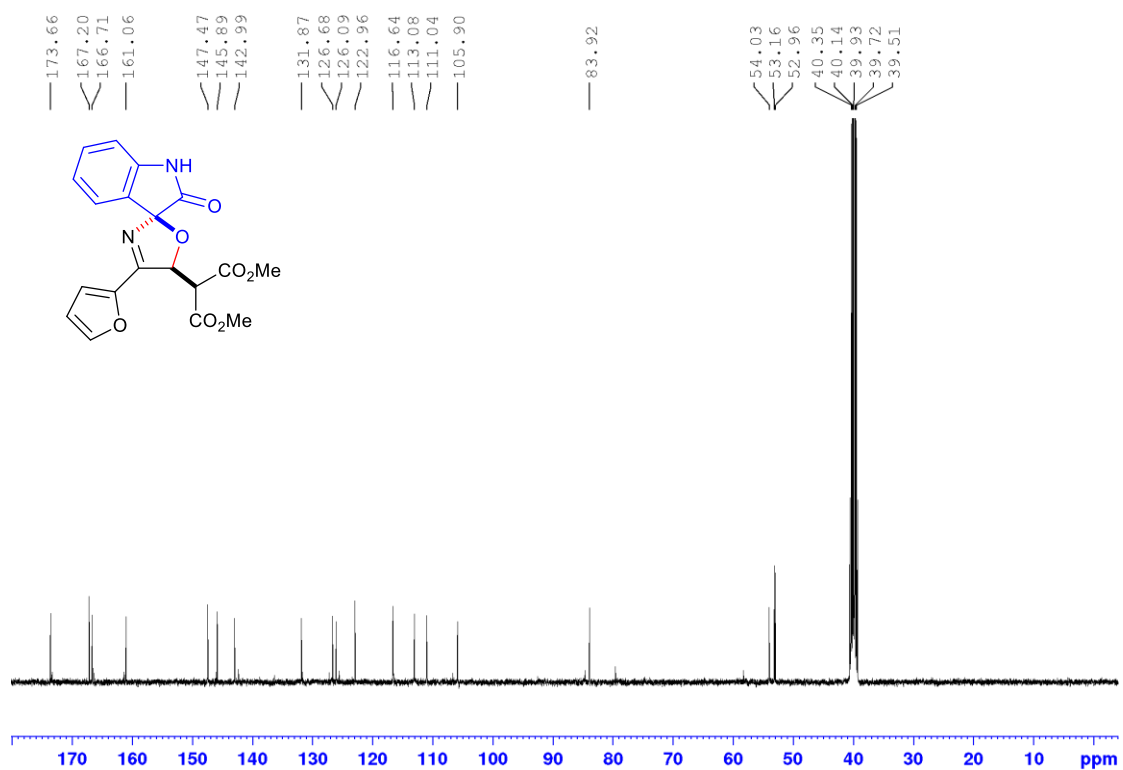

Dimethyl 2-(2-oxo-4'-(thiophen-2-yl)-5'H-spiro[indoline-3,2'-oxazol]-5'-yl)malonate (3la)

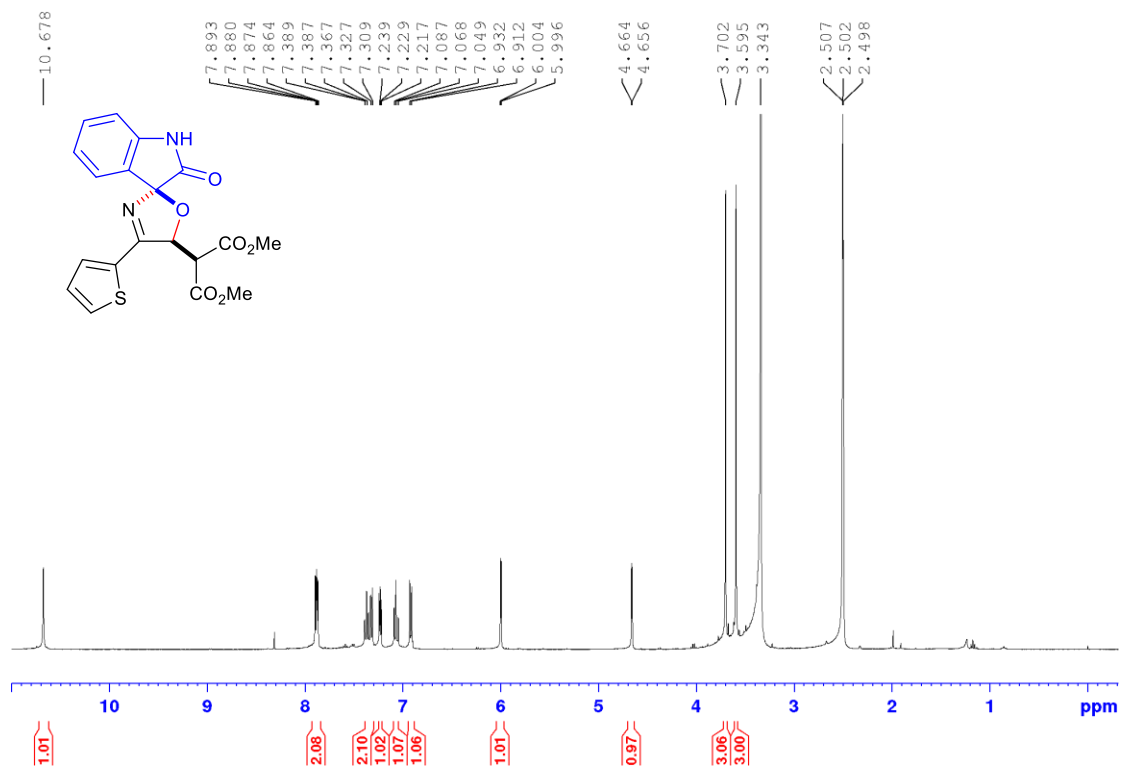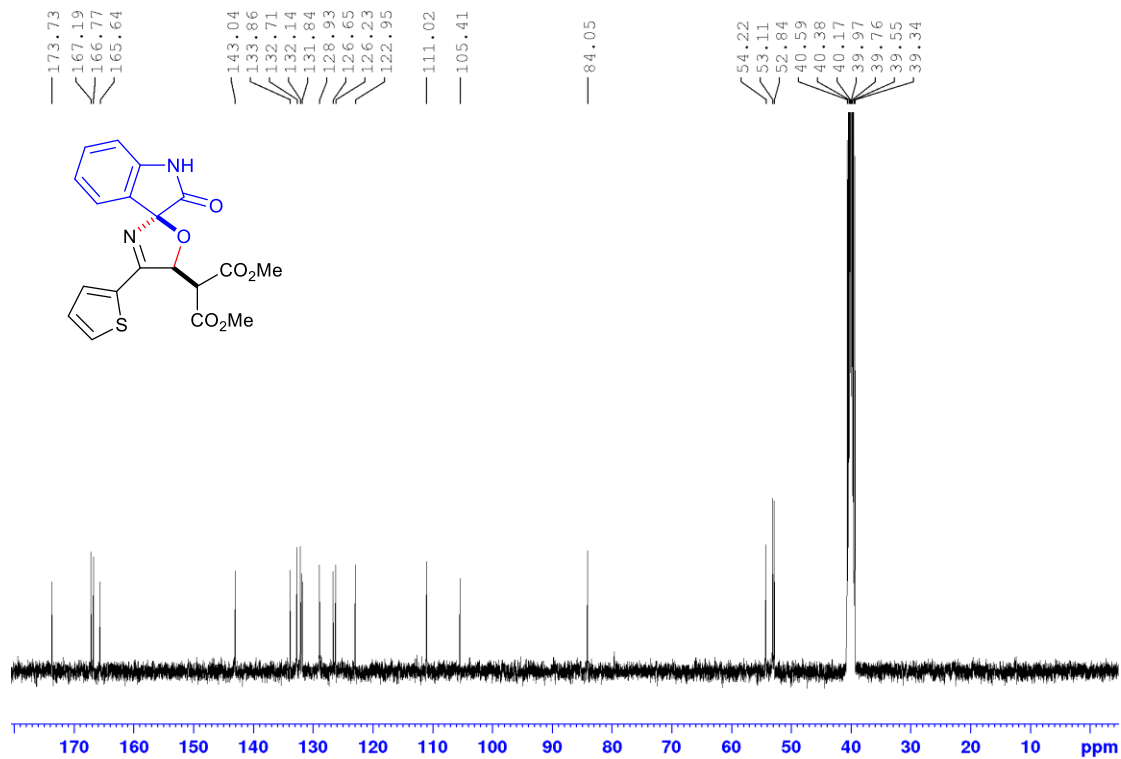

Dimethyl 2-(4'-([1,1'-biphenyl]-4-yl)-2-oxo-5'-H-spiro[indoline-3,2'-oxazol]-5'-yl)malonate (3ma)

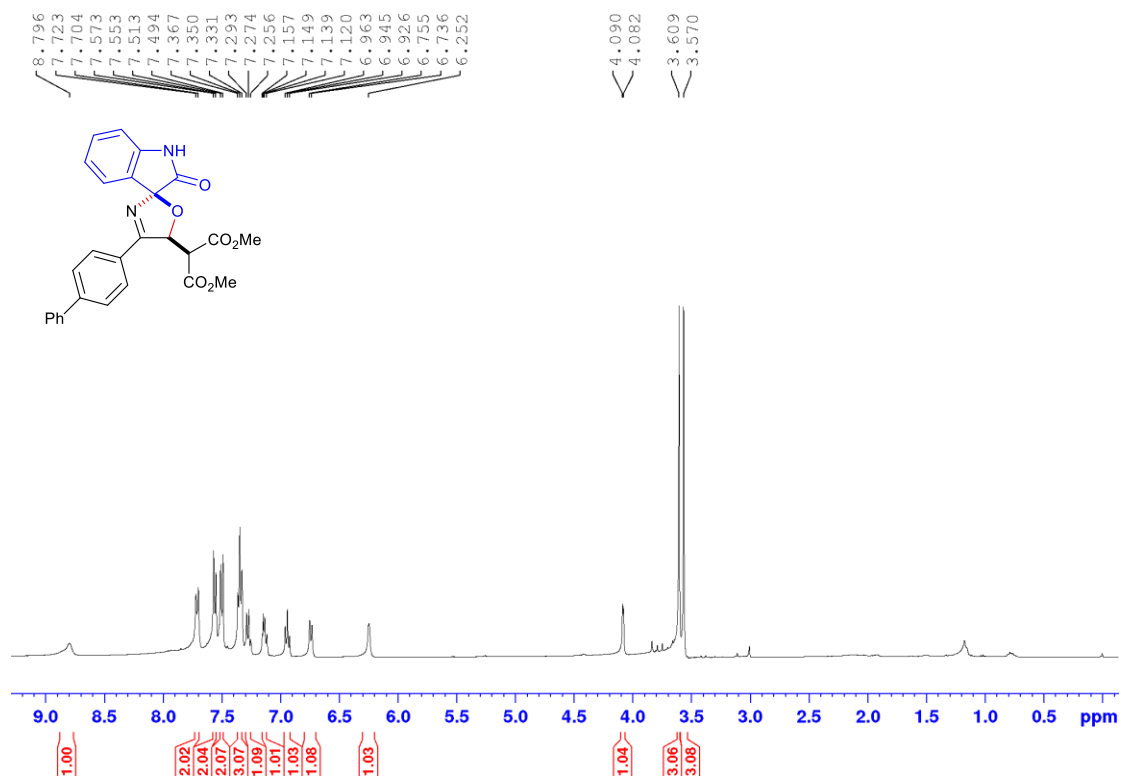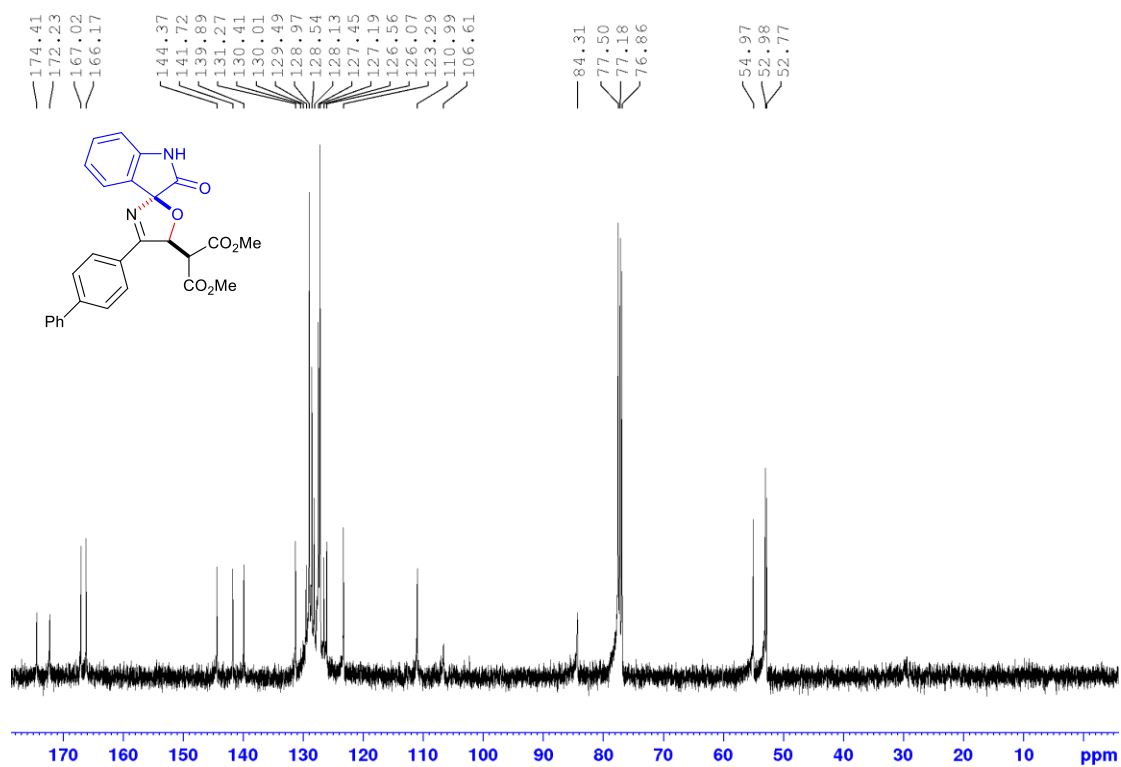

**Dimethyl 2-(5-methyl-2-oxo-4'-phenyl-5'H-spiro[indoline-3,2'-oxazol]-5'-yl)malonate (3ab)**

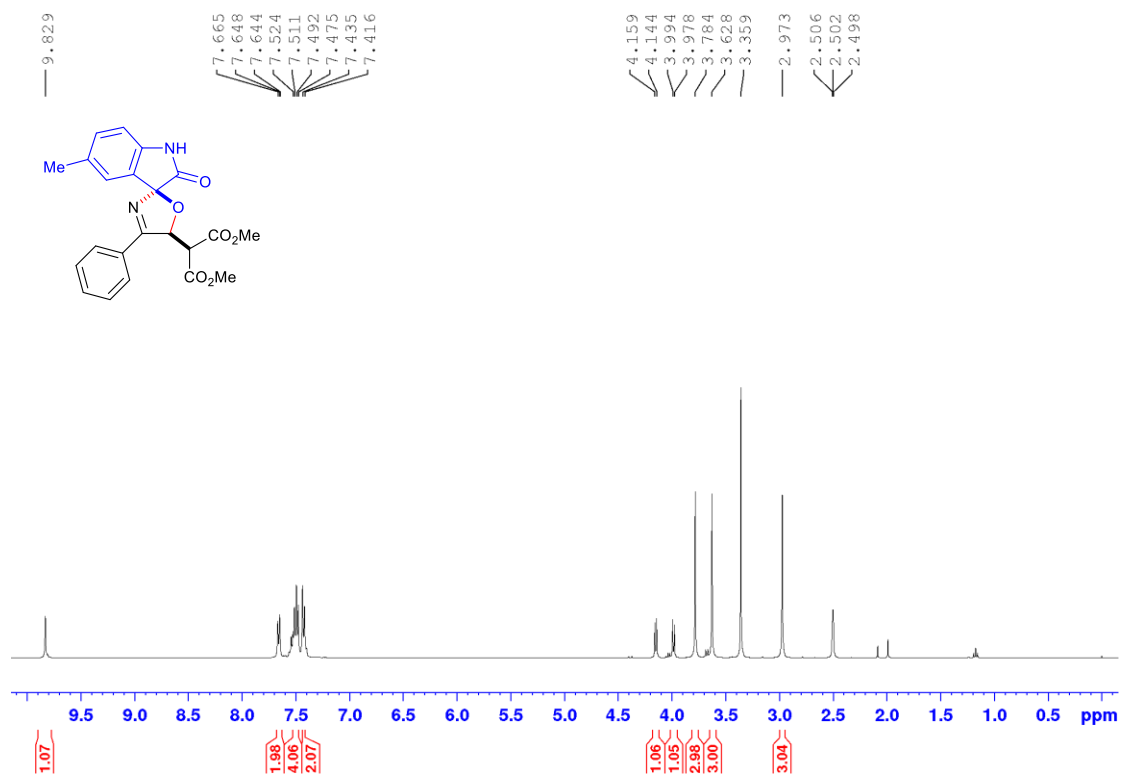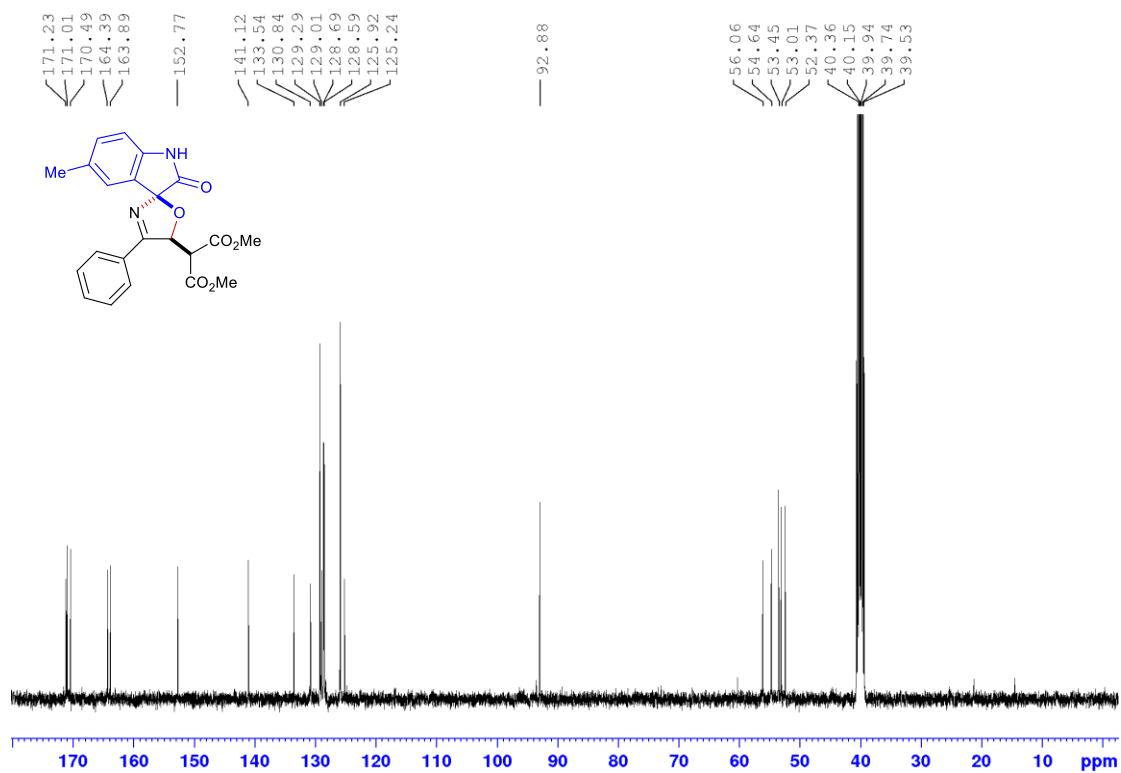

Dimethyl 2-(5-methoxy-2-oxo-4'-phenyl-5'H-spiro[indoline-3,2'-oxazol]-5'-yl)malonate (3ac)

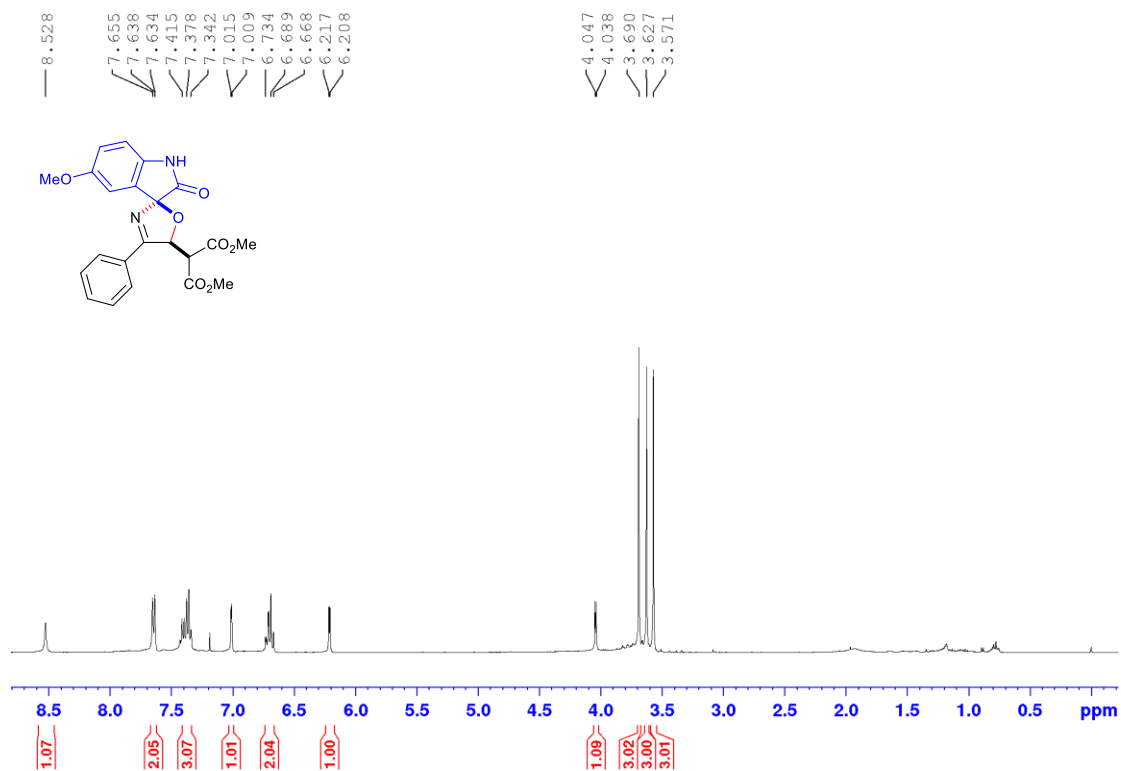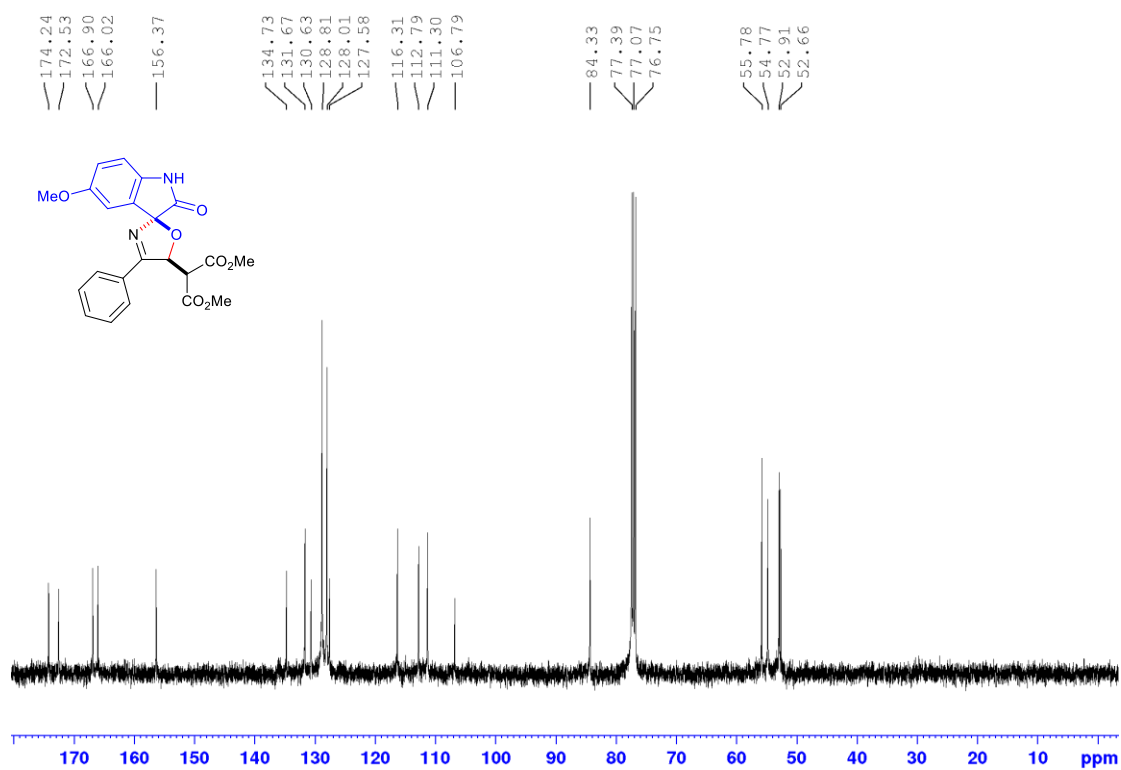



Dimethyl 2-(5-nitro-2-oxo-4'-phenyl-5'H-spiro[indoline-3,2'-oxazol]-5'-yl)malonate (3ad)

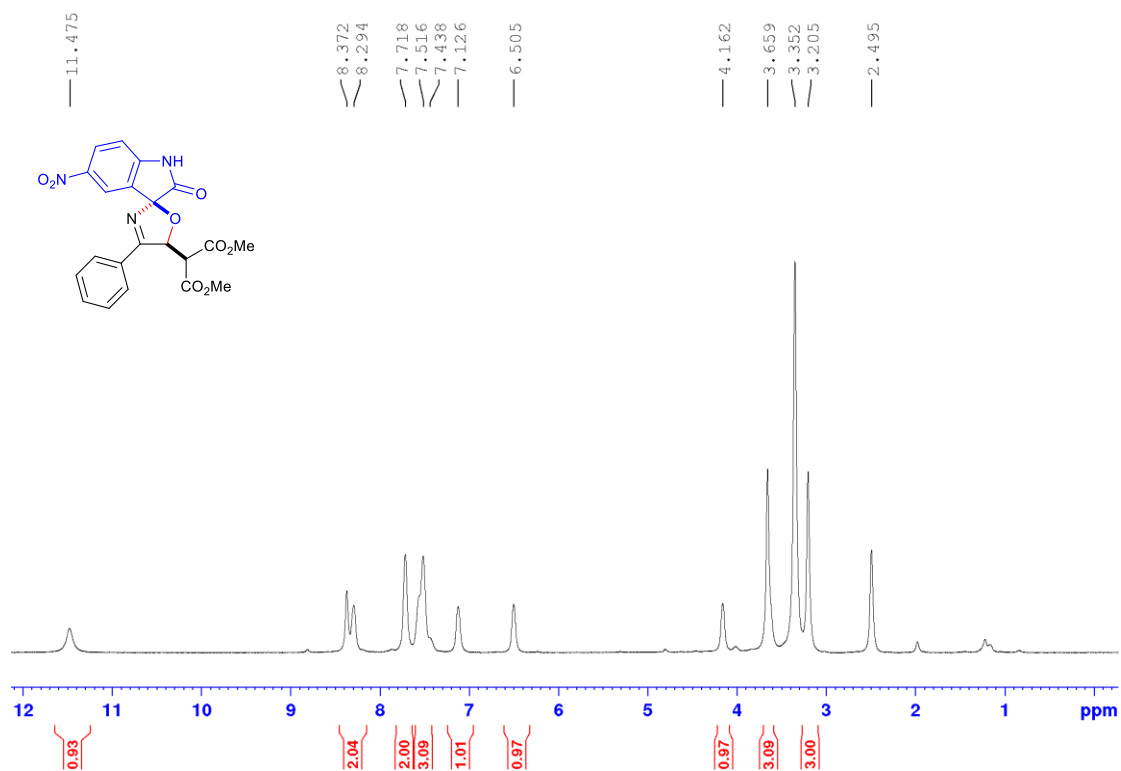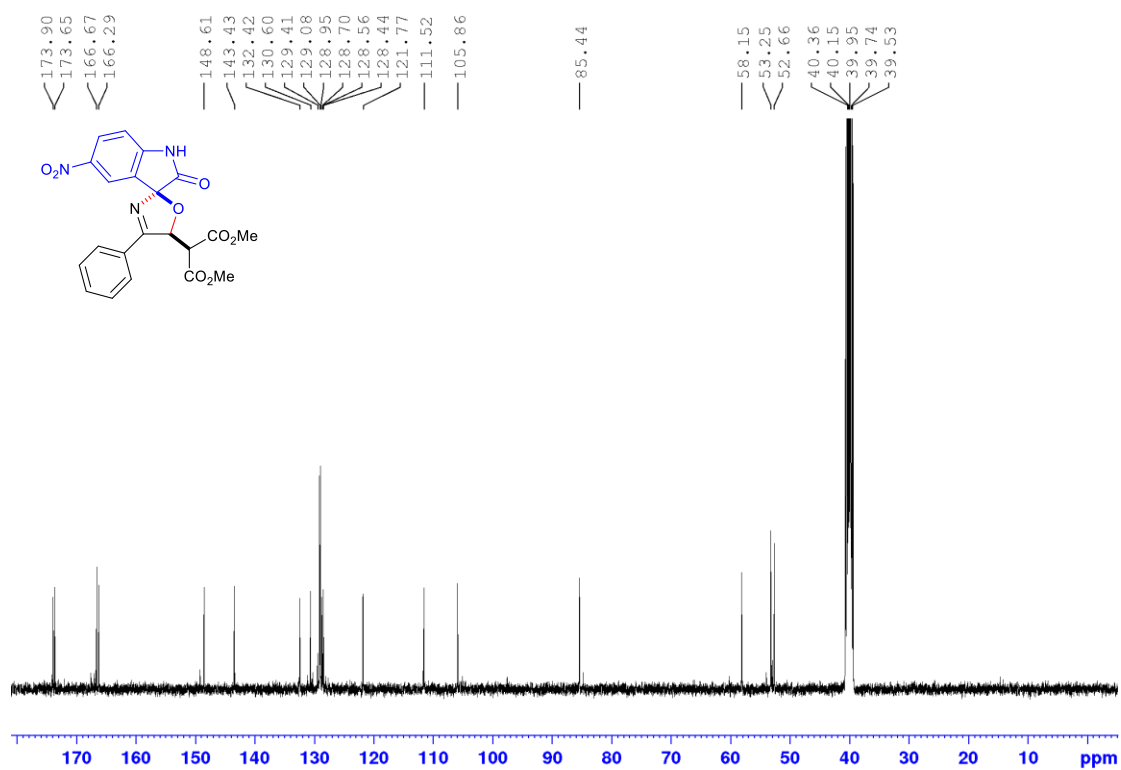

Dimethyl 2-(6-fluoro-2-oxo-4'-phenyl-5'H-spiro[indoline-3,2'-oxazol]-5'-yl)malonate (3ae)

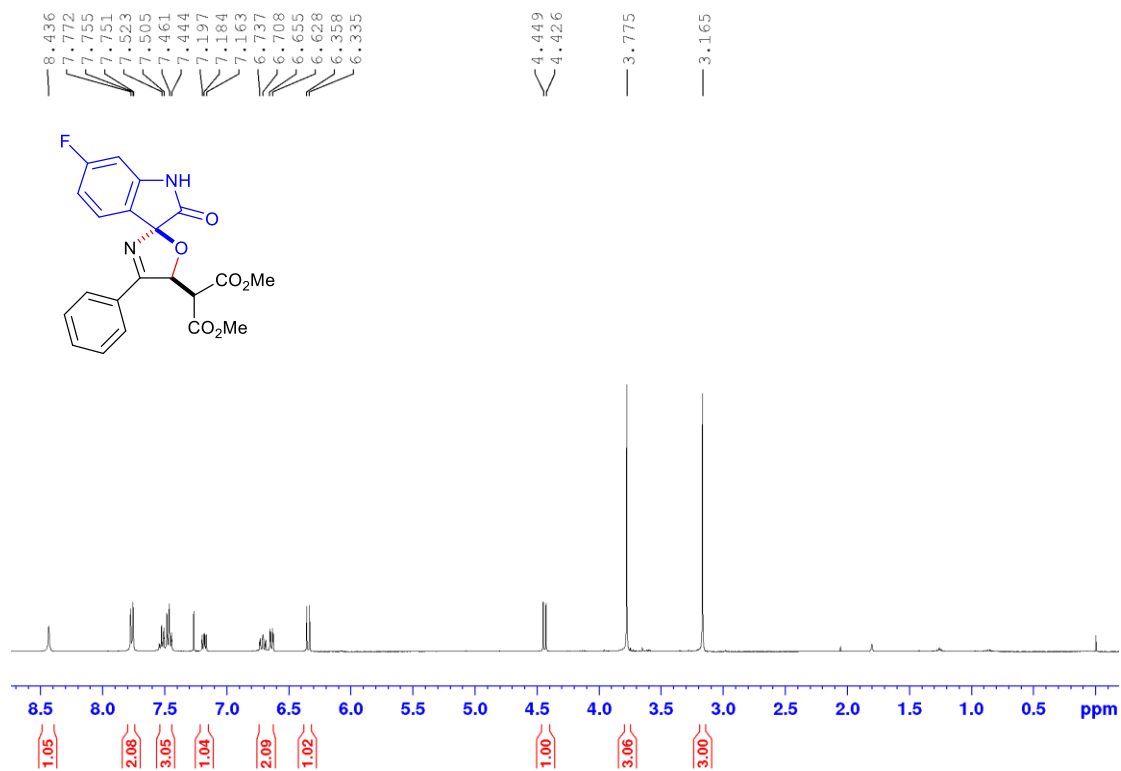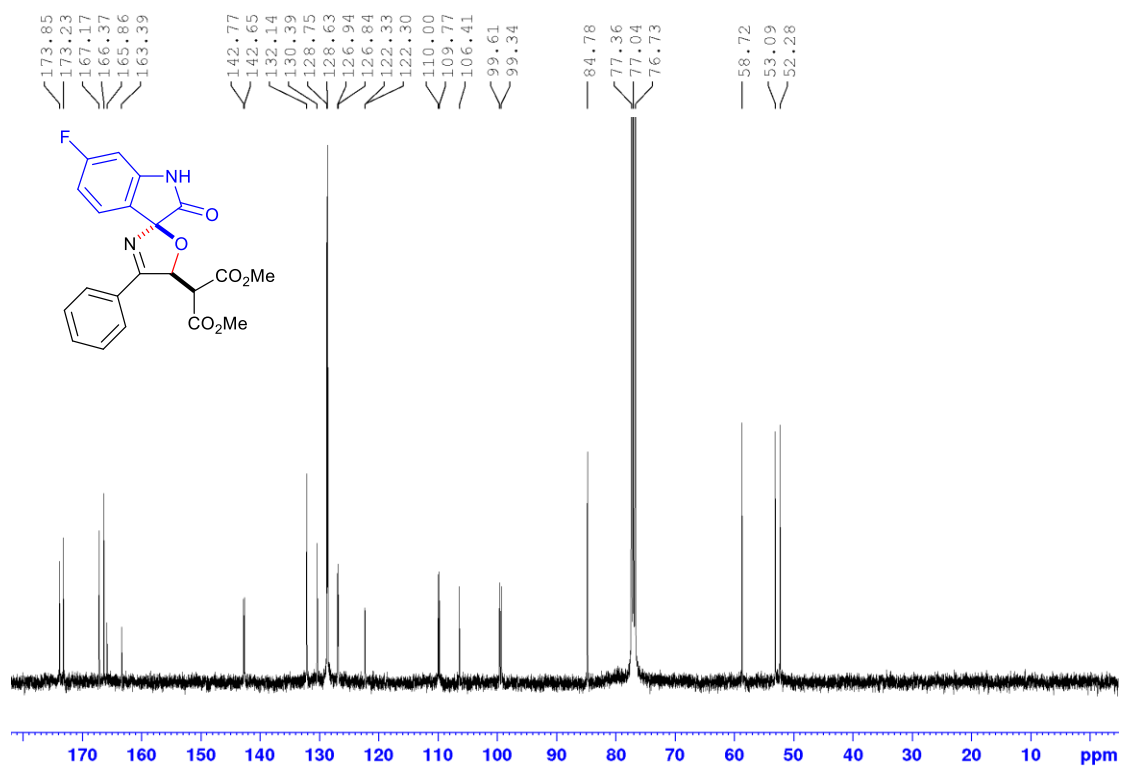

**Dimethyl 2-(6-fluoro-4'-(3-methoxyphenyl)-2-oxo-5'H-spiro[indoline-3,2'-oxazol]-5'-yl)malonate (3he)**

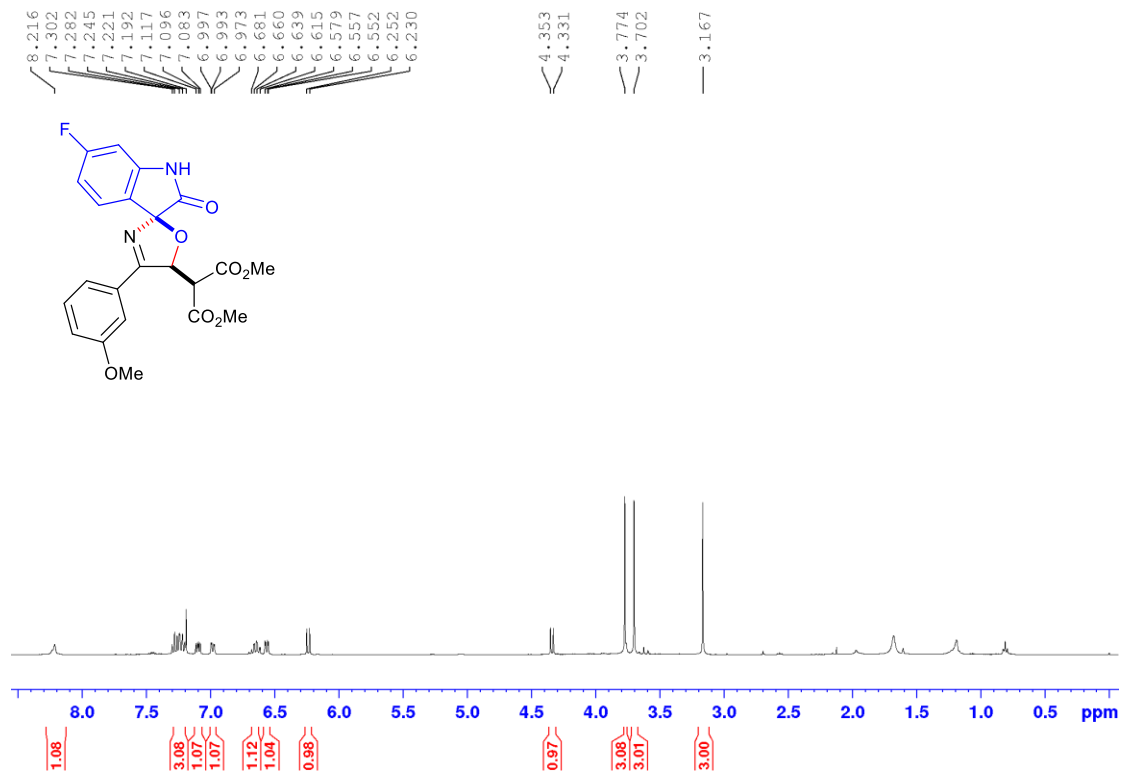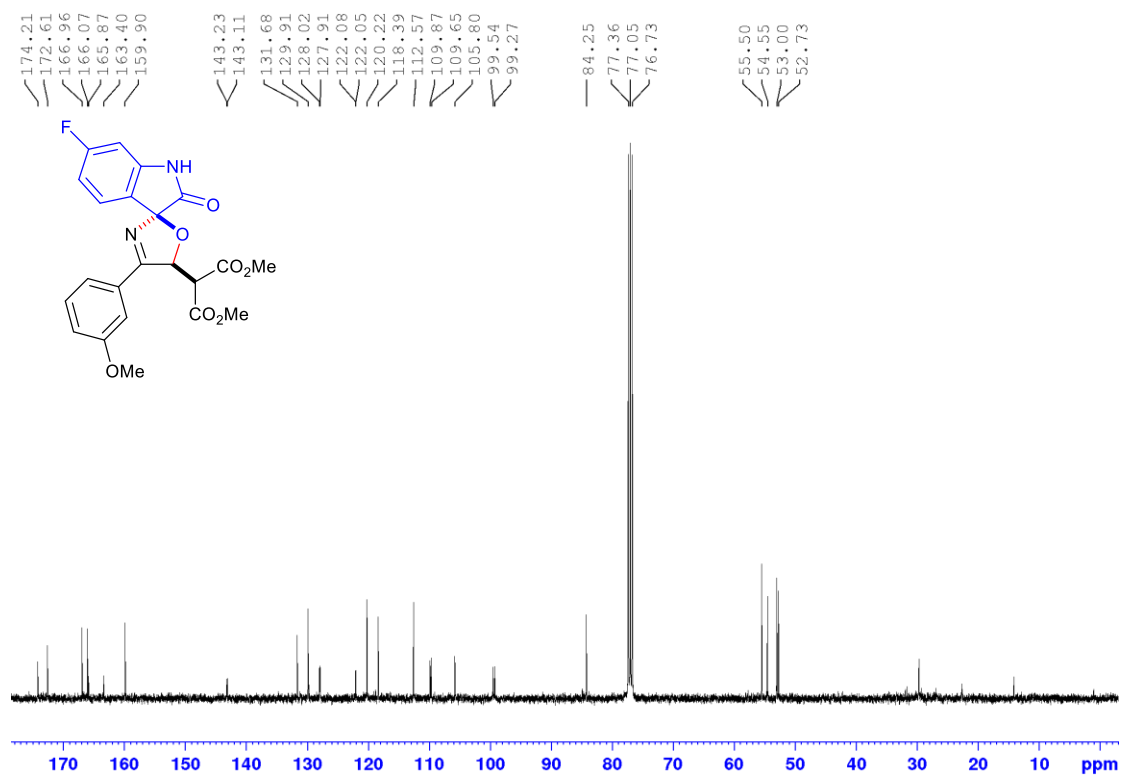

**Dimethyl 2-(4'-([1,1'-biphenyl]-4-yl)-6-chloro-2-oxo-5'H-spiro[indoline-3,2'-oxazol]-5'-yl)malonate (3mf)**

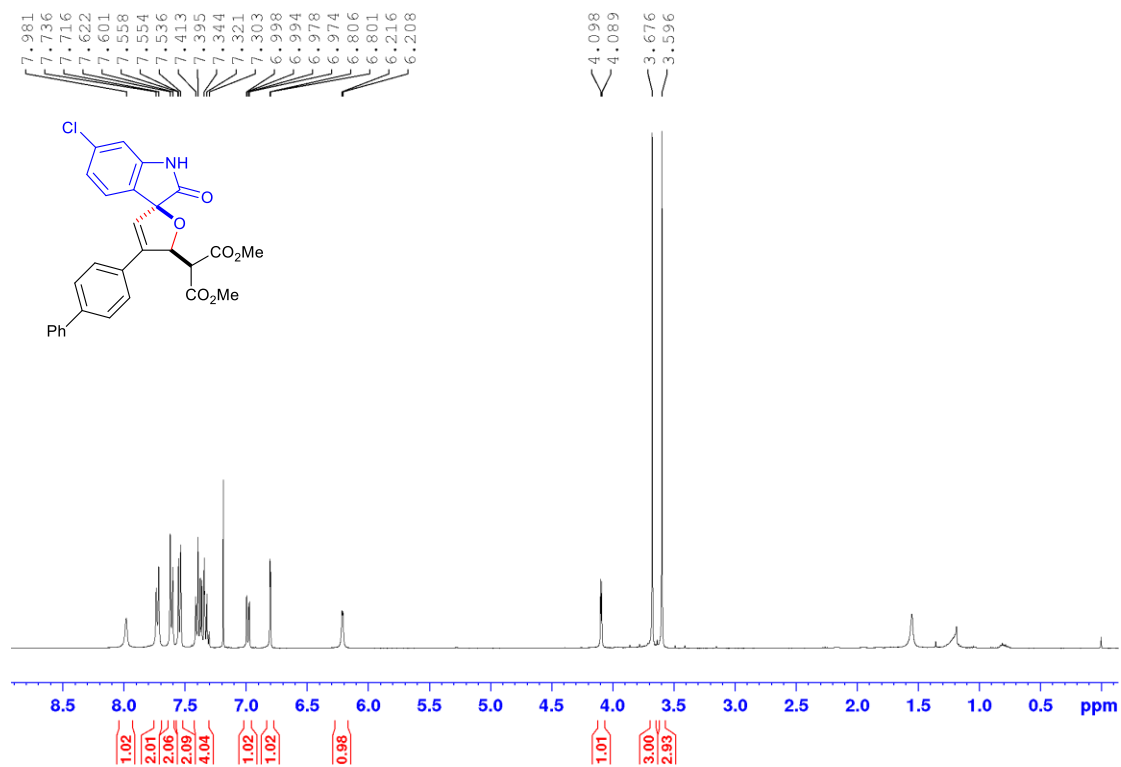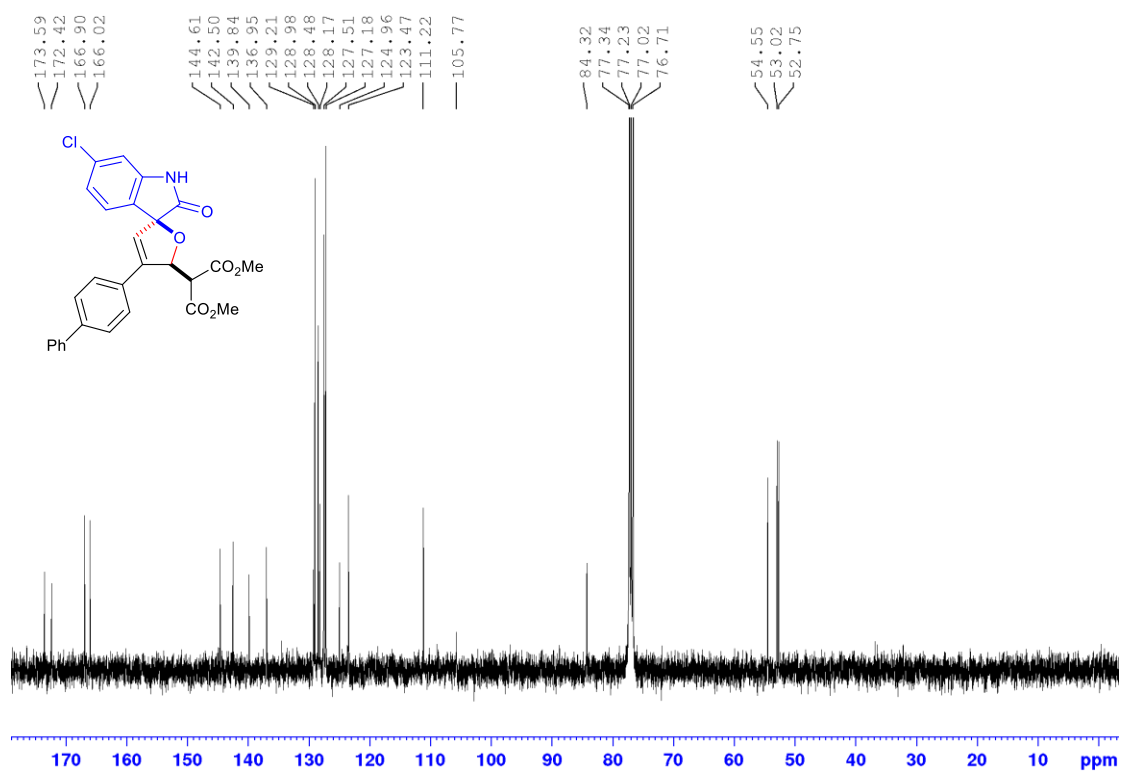

Dimethyl 2-(6-chloro-4'-(2-methoxyphenyl)-2-oxo-5'H-spiro[indoline-3,2'-oxazol]-5'-yl)malonate (3jf)

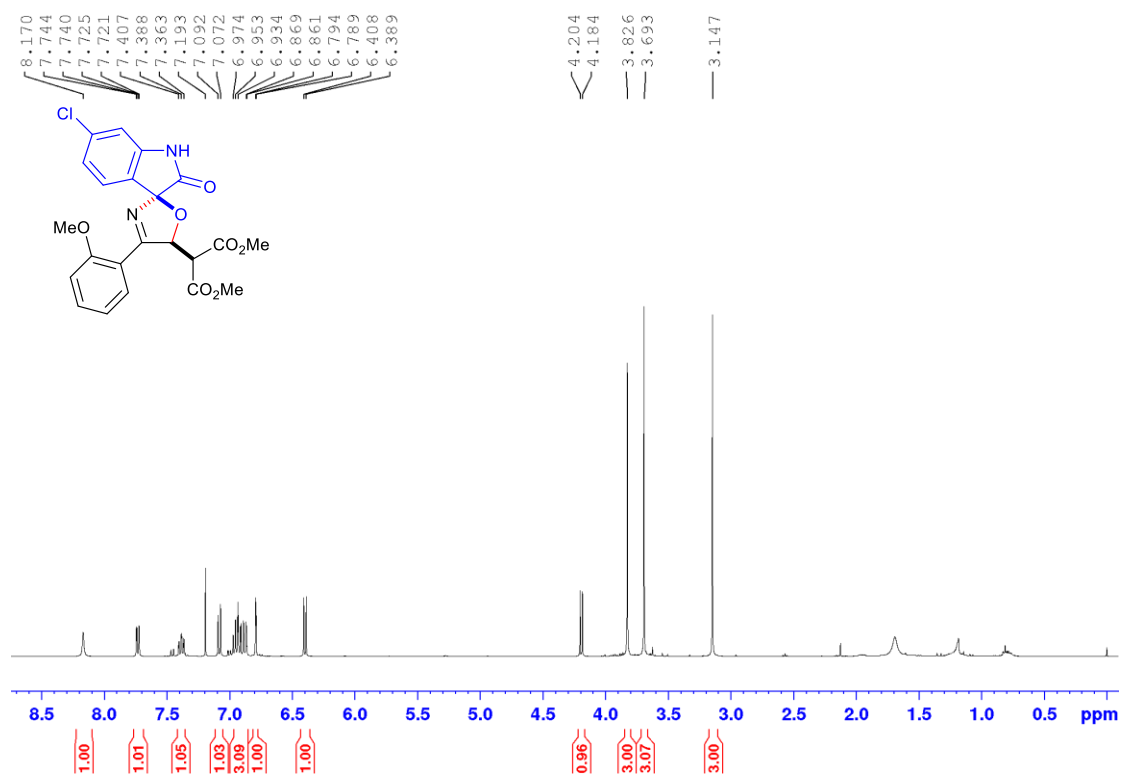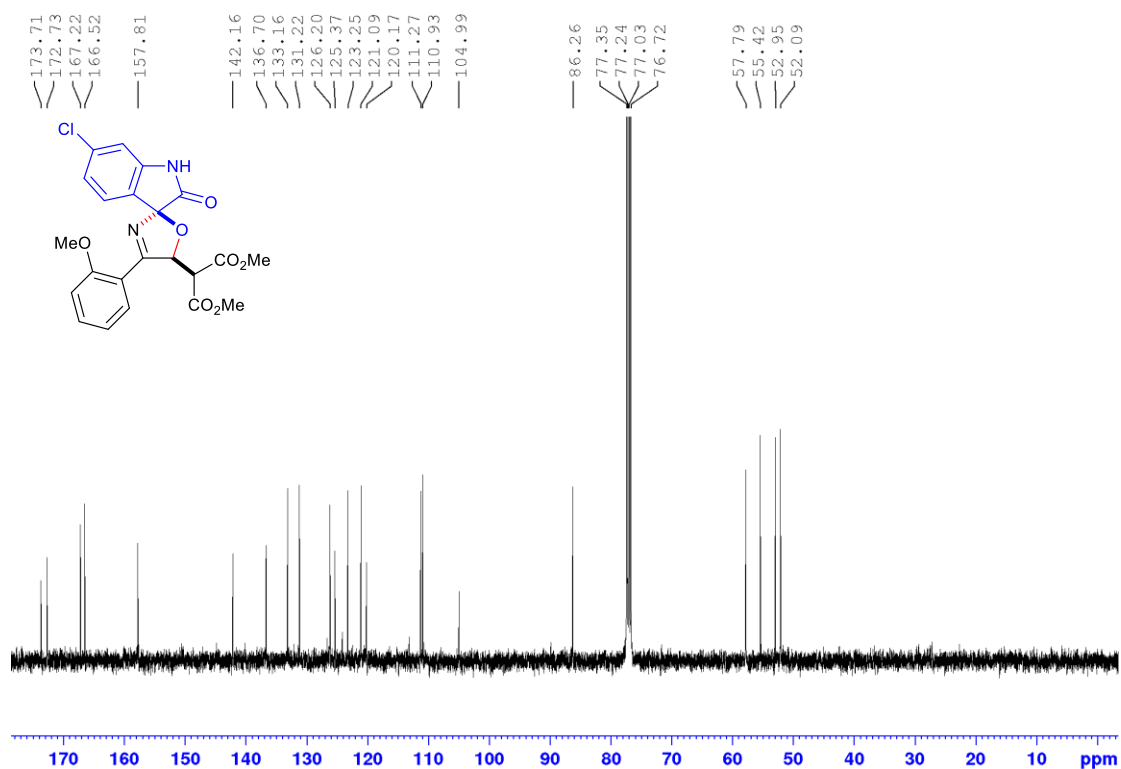

Dimethyl 2-(6-bromo-2-oxo-4'-phenyl-5'H-spiro[indoline-3,2'-oxazol]-5'-yl)malonate (3ag)

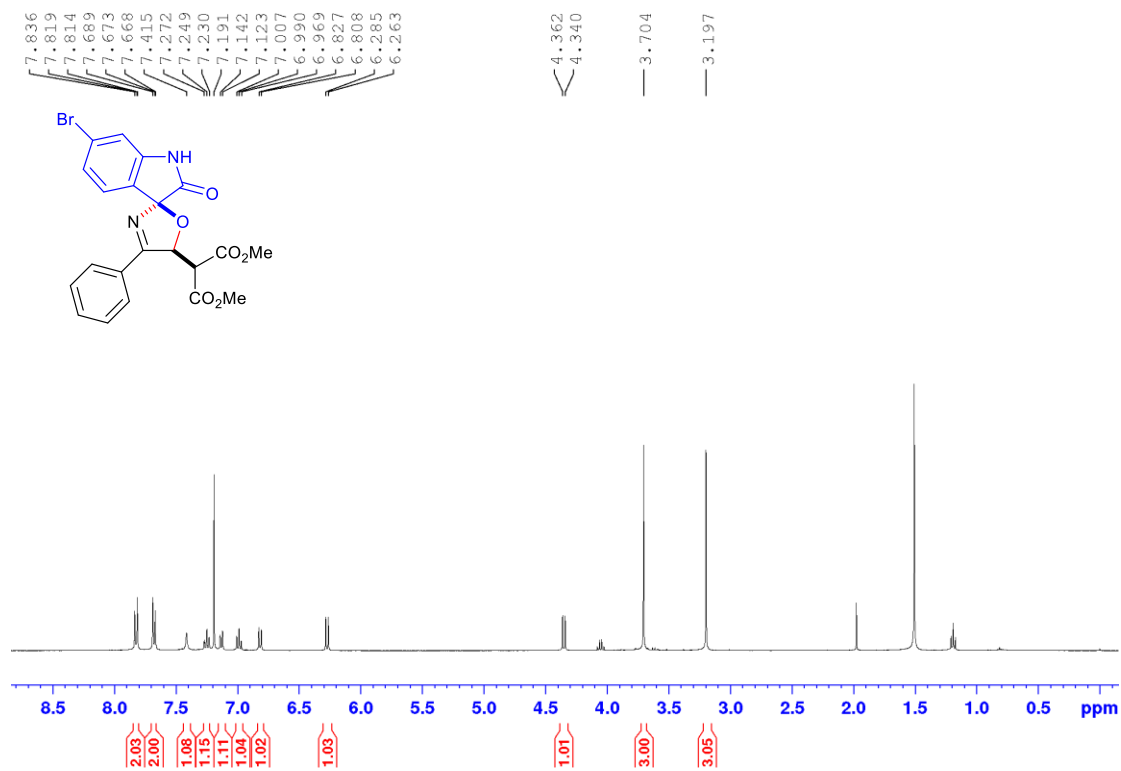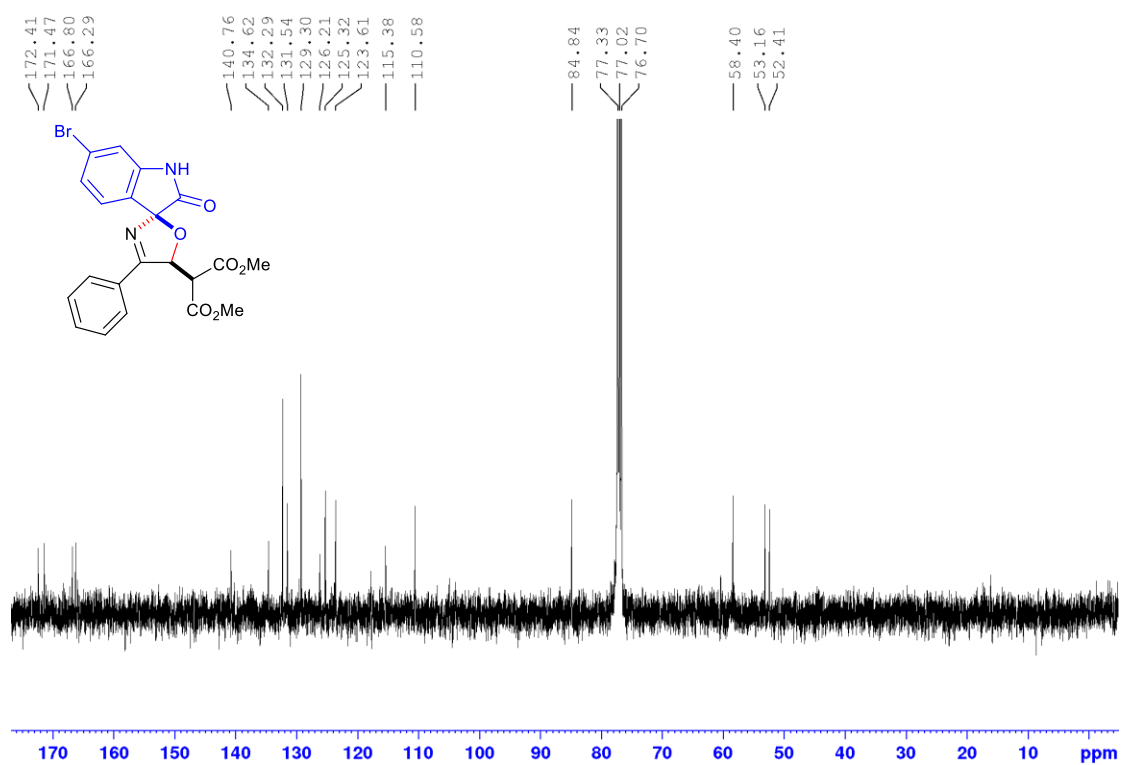

Dimethyl 2-(6-bromo-4'-(2-methoxyphenyl)-2-oxo-5'H-spiro[indoline-3,2'-oxazol]-5'-yl)malonate (3jg)

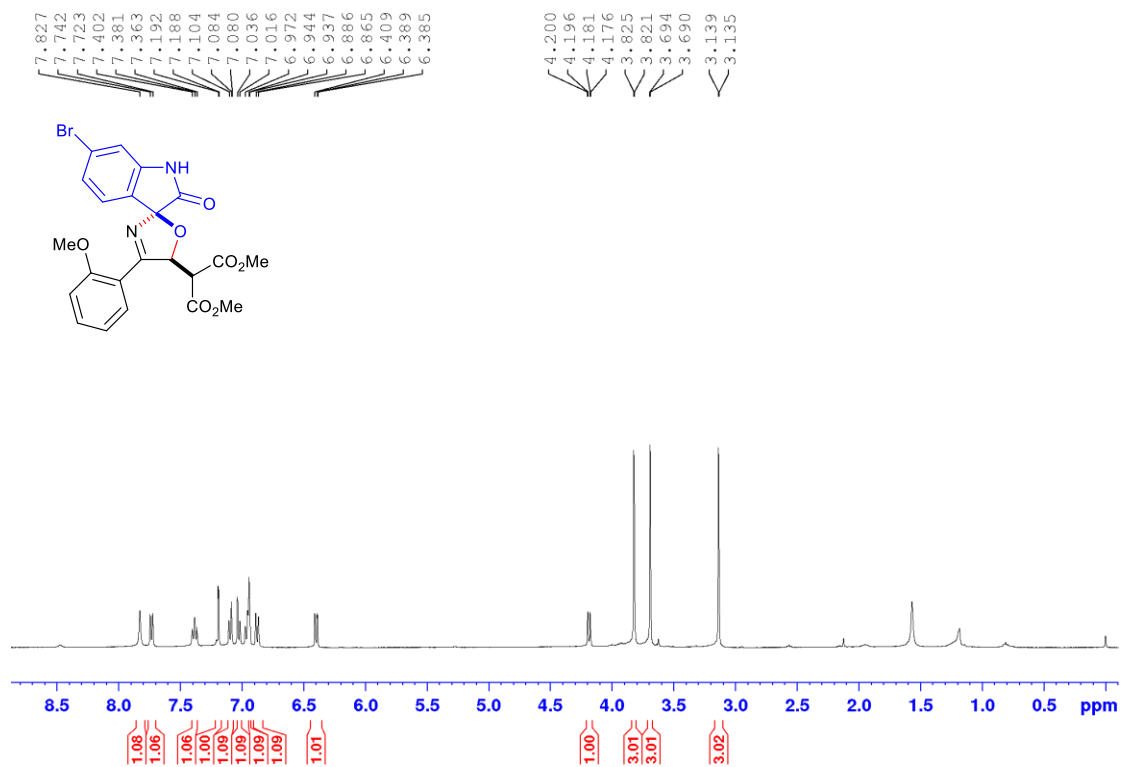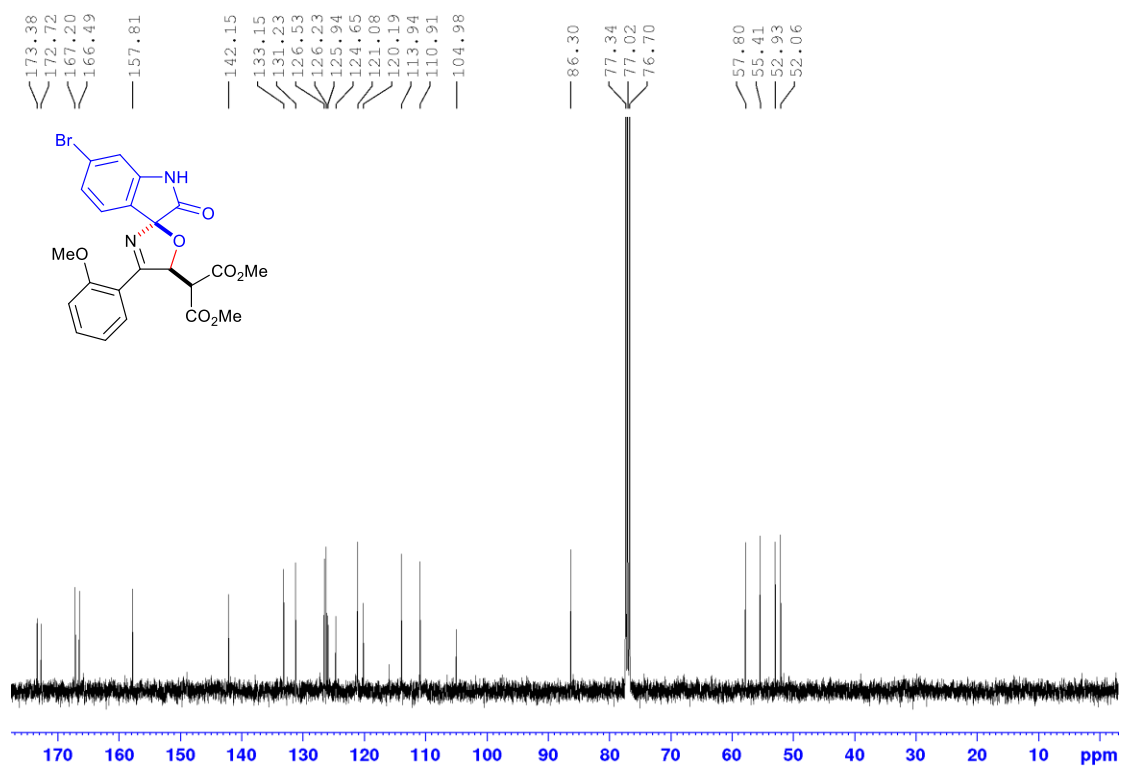

Dimethyl 2-(7-methyl-2-oxo-4'-phenyl-5'H-spiro[indoline-3,2'-oxazol]-5'-yl)malonate (3ah)

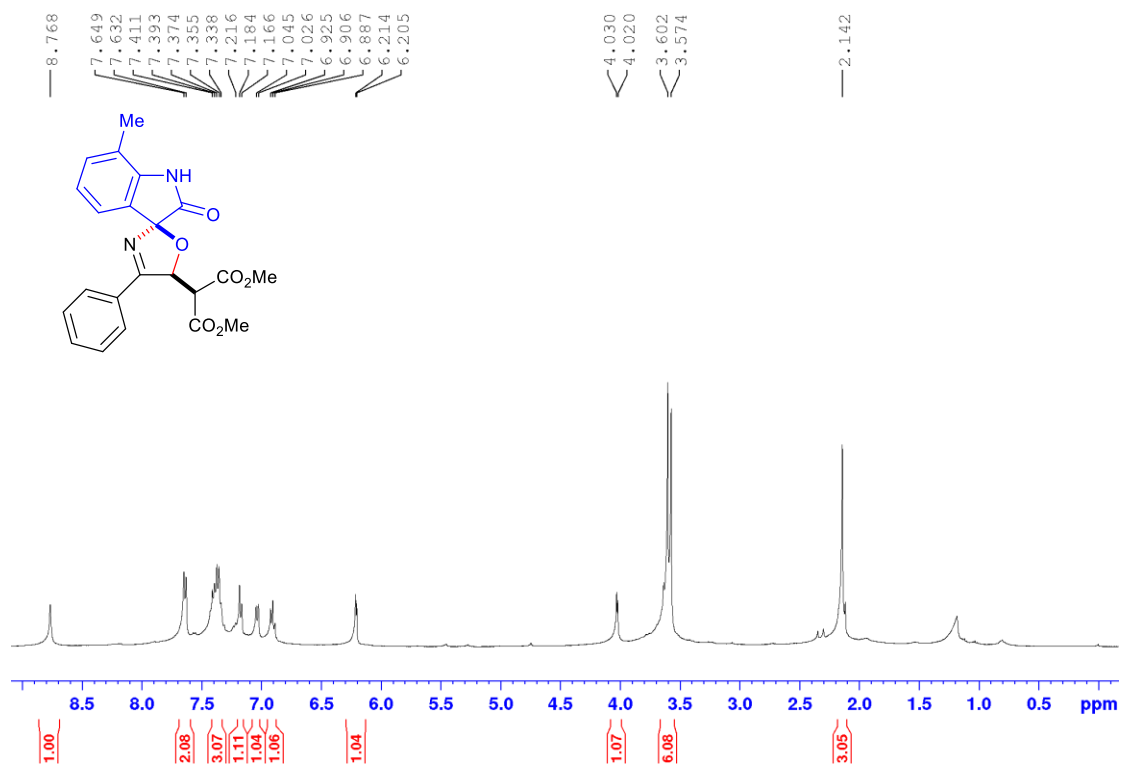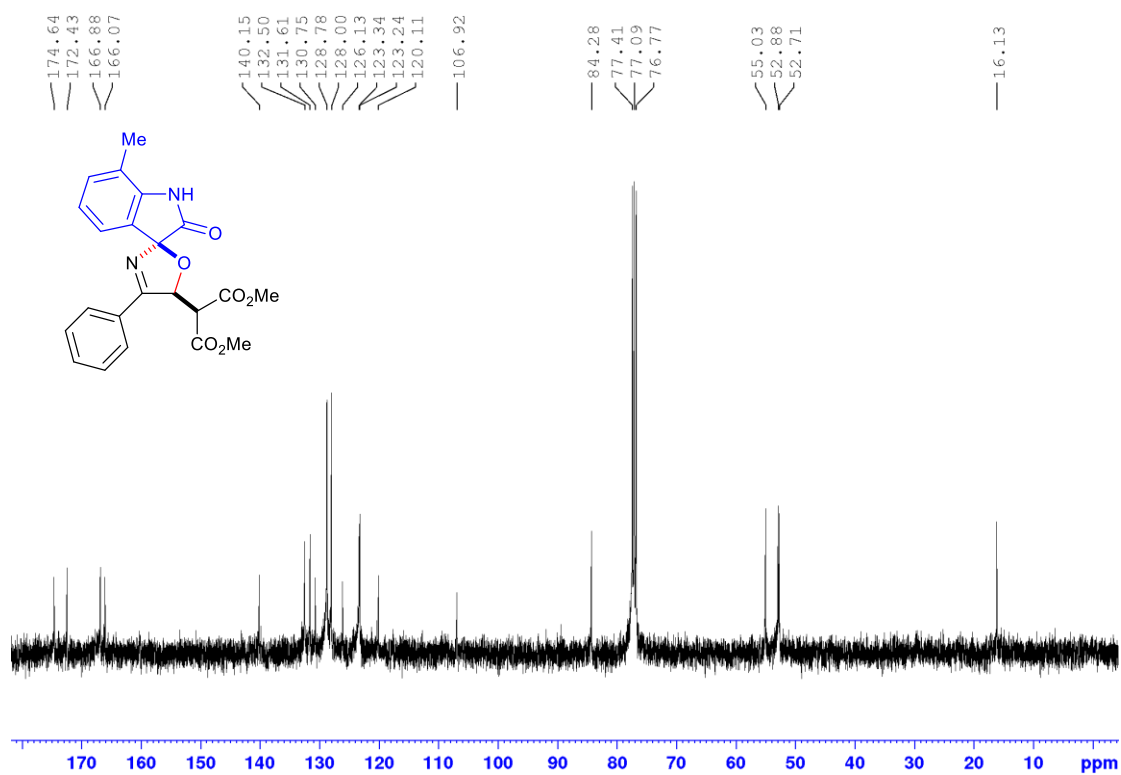



Dimethyl 2-(2-oxo-4'-phenyl-7-(trifluoromethyl)-5'H-spiro[indoline-3,2'-oxazol]-5'-yl)malonate (3ai)

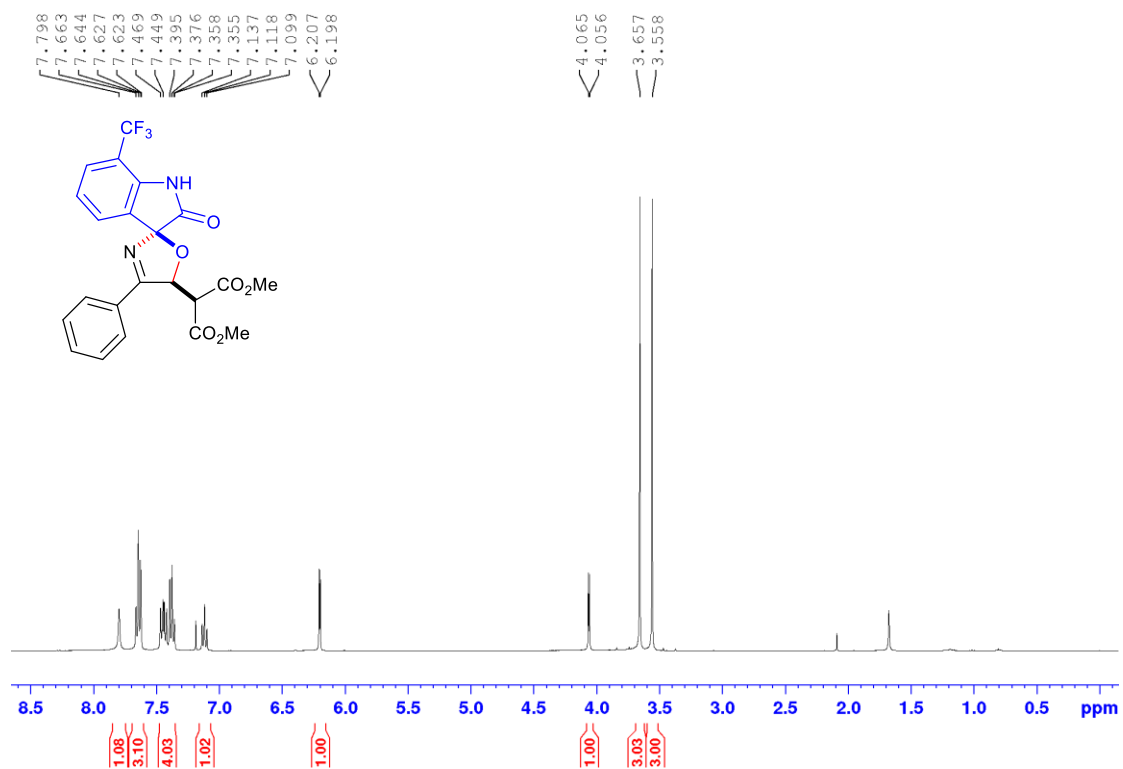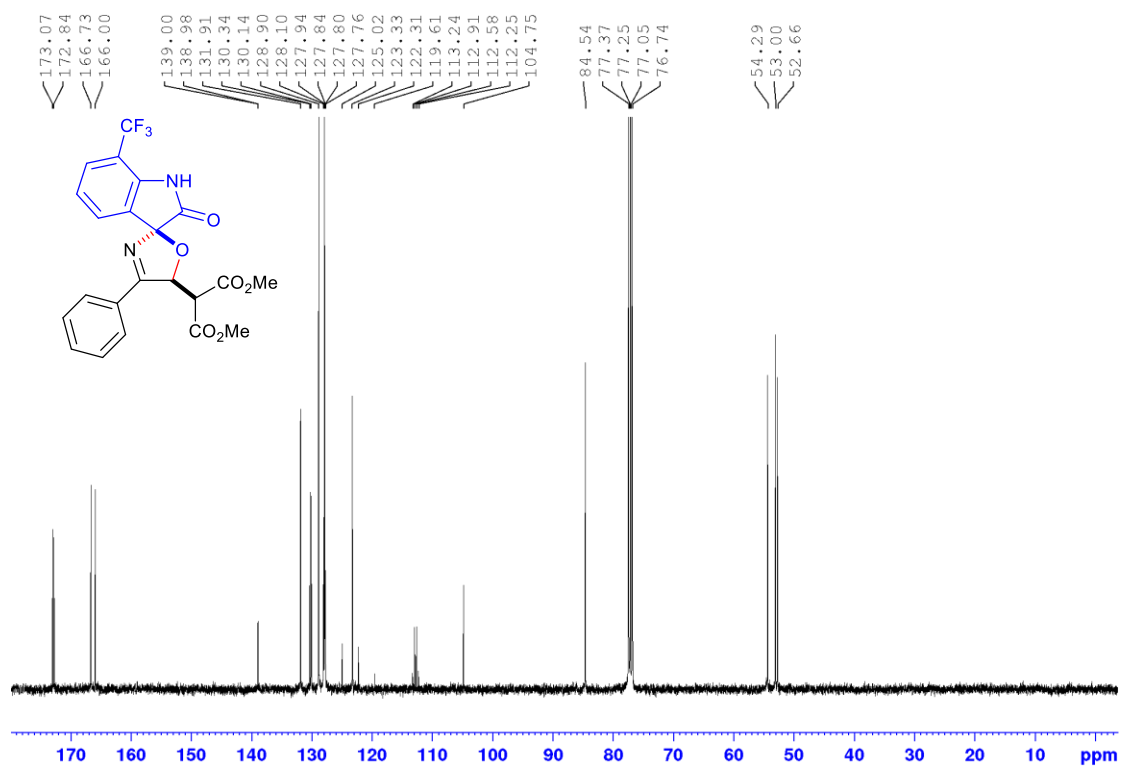

**Dimethyl 2-(4-chloro-4'-(2-methoxyphenyl)-2-oxo-5'H-spiro[indoline-3,2'-oxazol]-5'-yl)malonate (3jj)**

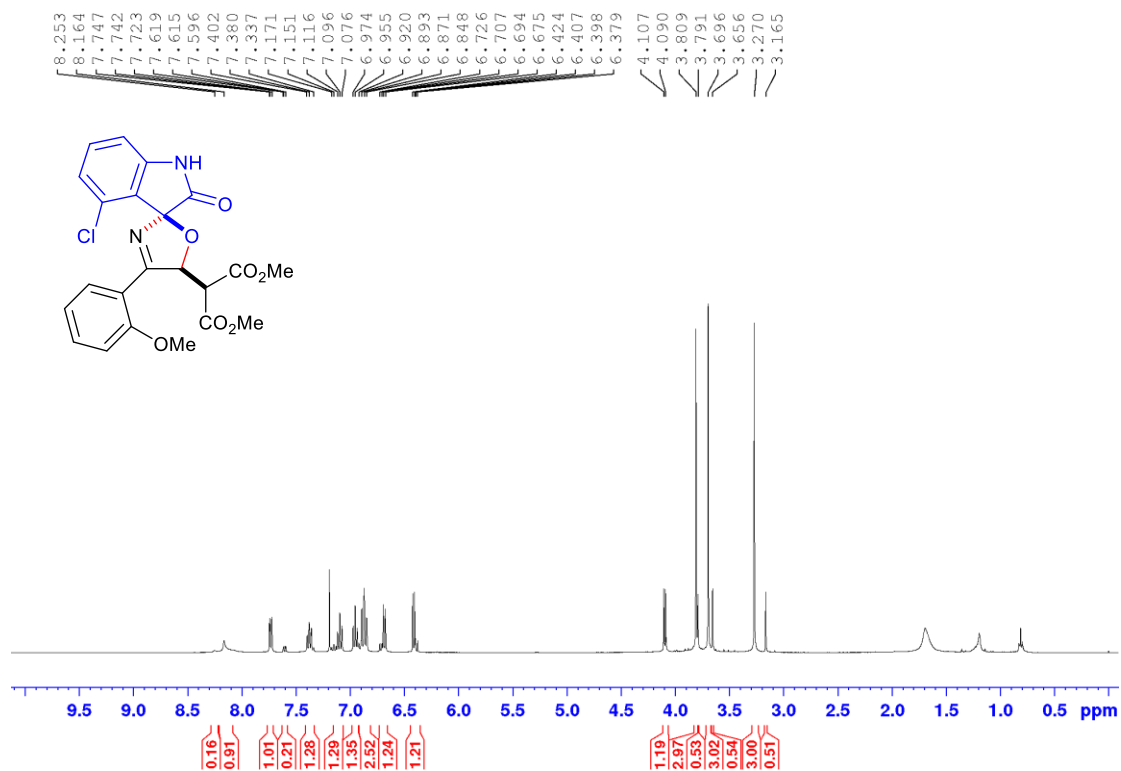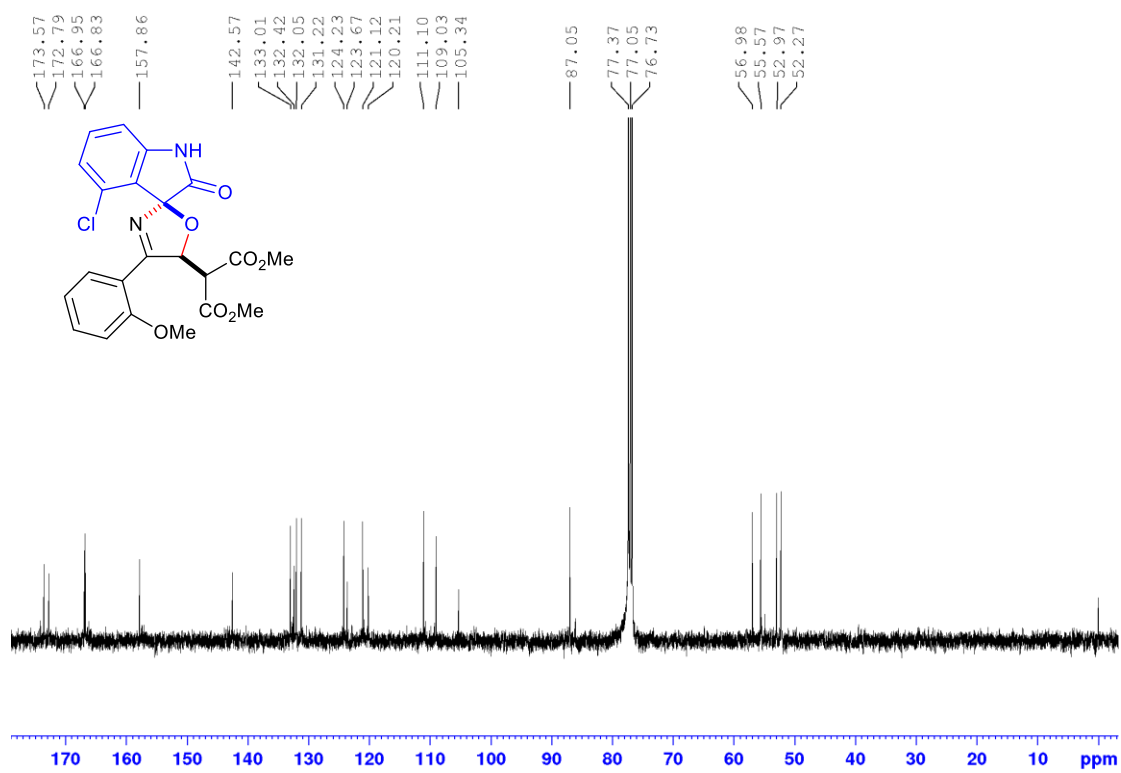

## Crystal Structure and data for compound 3ba

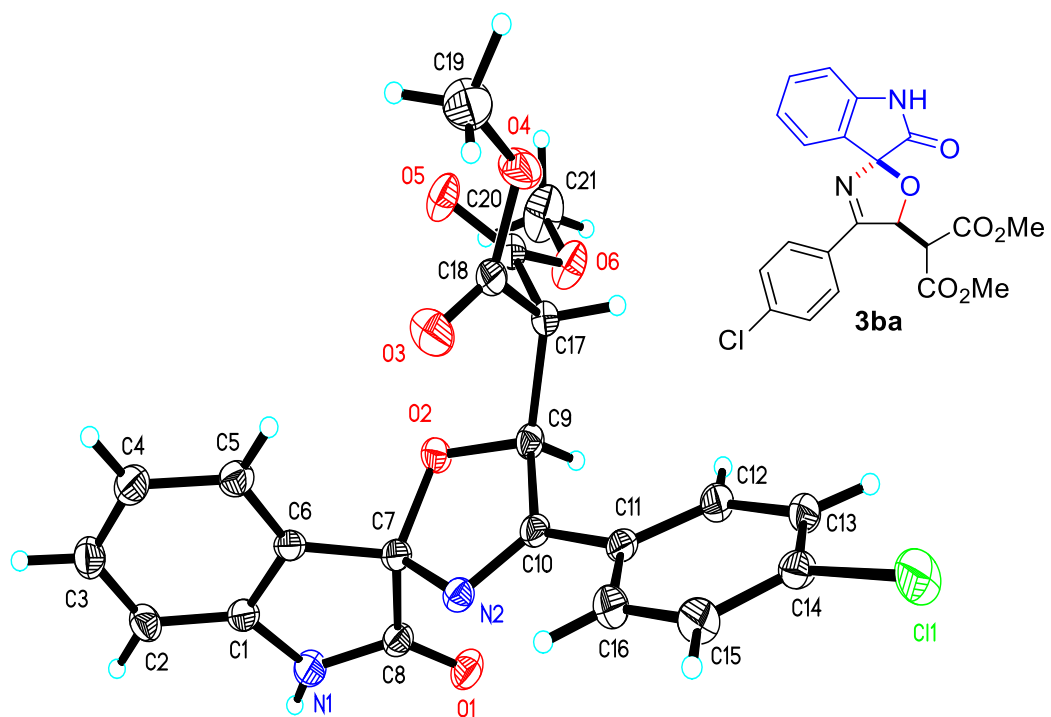

Crystal data and structure refinement for compound **3ba**

|                                   |                                                                  |           |
|-----------------------------------|------------------------------------------------------------------|-----------|
| Identification code               | shelx                                                            |           |
| Empirical formula                 | C <sub>21</sub> H <sub>17</sub> Cl N <sub>2</sub> O <sub>6</sub> |           |
| Formula weight                    | 428.82                                                           |           |
| Temperature                       | 193(2) K                                                         |           |
| Wavelength                        | 0.71073 Å                                                        |           |
| Crystal system                    | Trigonal                                                         |           |
| Space group                       | R -3 :H                                                          |           |
| Unit cell dimensions              | a = 32.8416(15) Å                                                | a = 90 °  |
|                                   | b = 32.8416(15) Å                                                | b = 90 °  |
|                                   | c = 9.7790(5) Å                                                  | g = 120 ° |
| Volume                            | 9134.3(10) Å <sup>3</sup>                                        |           |
| Z                                 | 18                                                               |           |
| Density (calculated)              | 1.403 Mg/m <sup>3</sup>                                          |           |
| Absorption coefficient            | 0.229 mm <sup>-1</sup>                                           |           |
| F(000)                            | 3996                                                             |           |
| Crystal size                      | 0.180 x 0.150 x 0.120 mm <sup>3</sup>                            |           |
| Theta range for data collection   | 2.528 to 27.534 °                                                |           |
| Index ranges                      | -29<=h<=42, -42<=k<=37, -12<=l<=12                               |           |
| Reflections collected             | 16997                                                            |           |
| Independent reflections           | 4662 [R(int) = 0.0720]                                           |           |
| Completeness to theta = 25.242?   | 99.7 %                                                           |           |
| Absorption correction             | Semi-empirical from equivalents                                  |           |
| Max. and min. transmission        | 0.7456 and 0.4538                                                |           |
| Refinement method                 | Full-matrix least-squares on F <sup>2</sup>                      |           |
| Data / restraints / parameters    | 4662 / 0 / 278                                                   |           |
| Goodness-of-fit on F <sup>2</sup> | 1.017                                                            |           |
| Final R indices [I>2sigma(I)]     | R1 = 0.0510, wR2 = 0.1348                                        |           |
| R indices (all data)              | R1 = 0.0759, wR2 = 0.1552                                        |           |
| Extinction coefficient            | 0.0013(2)                                                        |           |
| Largest diff. peak and hole       | 1.040 and -0.327 e.Å <sup>-3</sup>                               |           |

## Computational details

All calculations were performed with the Gaussian 16<sup>2</sup> program without symmetry restrictions. All molecules were using the BP86 functional<sup>3,4</sup> with def2-SVP<sup>5</sup> basis set and dispersion correction by Grimme with Becke-Johnson damping D3(BJ)<sup>6,7</sup>, the solvation effects of acetonitrile (an experimentally used solvent) were considered by SMD<sup>8</sup> solvation model (termed as BP86+D3(BJ)/def2-SVP (SMD, solvent= Acetonitrile)). The energetic results were then improved by the single-point at BP86/def2-TZVPP<sup>9,10</sup> levels with the solvation effects included. Therefore, all the energetics reported in this study is at the BP86+D3(BJ)/def2-TZVPP (SMD, solvent= Acetonitrile)//BP86+D3(BJ)/def2-SVP (SMD, solvent= Acetonitrile) level.

## References

1. Mao, P.; Zhou, L.; Zheng, A.; Miao, C.; Yang, H. Cu(OAc)<sub>2</sub>-triggered cascade reaction of malonate-tethered acyl oximes with indoles, indole-2-alcohols, and indole-2-carboxamides. *Org. Lett.*, **2019**, *21*, 3153.
2. Frisch, M. J. T.; S, G. W.; B. H.; Scuseria, G. E.; Robb, M. A.; Cheeseman, J. R.; Scalmani, G.; Barone, V.; Mennucci, B.; Petersson, G. A.; Nakatsuji, H.; Caricato, M.; Li, X.; Hratchian, H. P.; Izmaylov, A. F.; Bloino, J.; Zheng, G.; Sonnenberg, J. L.; Hada, M.; Ehara, M.; Toyota, K.; Fukuda, R.; Hasegawa, J.; Ishida, M.; Nakajima, T.; Honda, Y.; Kitao, O.; Nakai, H.; Vreven, T.; Montgomery, J. A., Jr.; Peralta, J. E.; Ogliaro, F.; Bearpark, M.; Heyd, J. J.; Brothers, E.; Kudin, K. N.; Staroverov, V. N.; Kobayashi, R.; Normand, J.; Raghavachari, K.; Rendell, A.; Burant, J. C.; Iyengar, S. S.; Tomasi, J.; Cossi, M.; Rega, N.; Millam, J. M.; Klene, M.; Knox, J. E.; Cross, J. B.; Bakken, V.; Adamo, C.; Jaramillo, J.; Gomperts, R.; Stratmann, R. E.; Yazyev, O.; Austin, A. J.; Cammi, R.; Pomelli, C.; Ochterski, J. W.; Martin, R. L.; Morokuma, K.; Zakrzewski, V. G.; Voth, G. A.; Salvador, P.; Dannenberg, J. J.; Dapprich, S.; Daniels, A. D.; Farkas, Ö.; Foresman, J. B.; Ortiz, J. V.; Cioslowski, J.; Fox, D. J., Gaussian, Inc. Wallingford, CT, **2009**.
3. Becke, A. D. Density-functional exchange-energy approximation with correct asymptotic behavior. *Phys. Rev. A.*, **1988**, *38*, 3098.
4. Perdew, J. P. Density-functional approximation for the correlation energy of the inhomogeneous electron gas. *Phys. Rev. B.*, **1986**, *33*, 8822.
5. Schäfer, A.; Horn, H.; Ahlrichs, R. Fully optimized contracted Gaussian basis sets for atoms Li to Kr. *J. Chem. Phys.*, **1992**, *97*, 2571.
6. Grimme, S.; Ehrlich, S.; Goerigk, L. Effect of the damping function in dispersion corrected density functional theory. *J. Comput. Chem.*, **2011**, *32*, 1456.
7. Grimme, S.; Antony, J.; Ehrlich, S.; Krieg, H. A consistent and accurate ab initio parametrization of density functional dispersion correction (DFT-D) for the 94 elements H-Pu. *J. Chem. Phys.*, **2010**, *132*, 154104.
8. Marenich, A. V.; Cramer, C. J.; Truhlar, D. G. Universal Solvation Model Based on Solute Electron Density and on a Continuum Model of the Solvent Defined by the Bulk Dielectric Constant and Atomic Surface Tensions. *J. Phys. Chem. B.*, **2009**, *113*, 6378.
9. Weigend, F.; Ahlrichs, R. Balanced basis sets of split valence, triple zeta valence and quadruple zeta valence quality for H to Rn: Design and assessment of accuracy. *Phys. Chem. Chem. Phys.*, **2005**, *7*, 3297.
10. Weigend, F.; Häser, M.; Patzelt, H.; Ahlrichs, R. RI-MP2: optimized auxiliary basis sets and demonstration of efficiency. *Chem. Phys. Lett.*, **1998**, *294*, 143.

## Optimized structures and the whole catalytic cycle

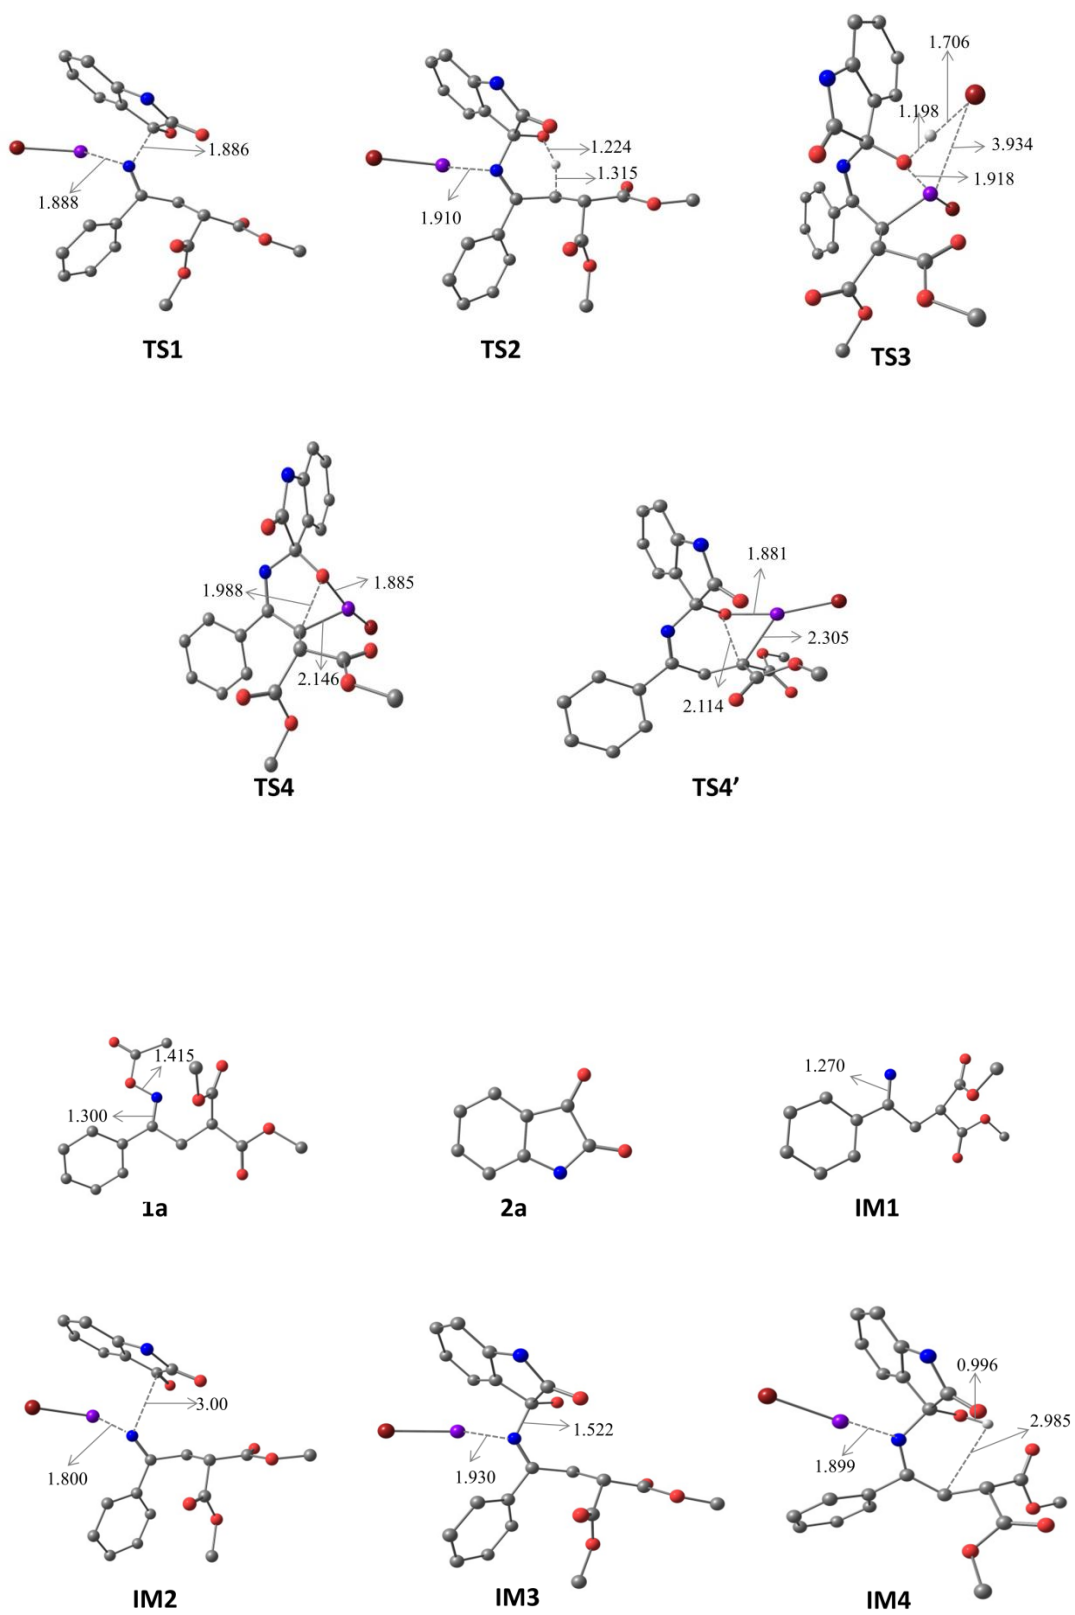

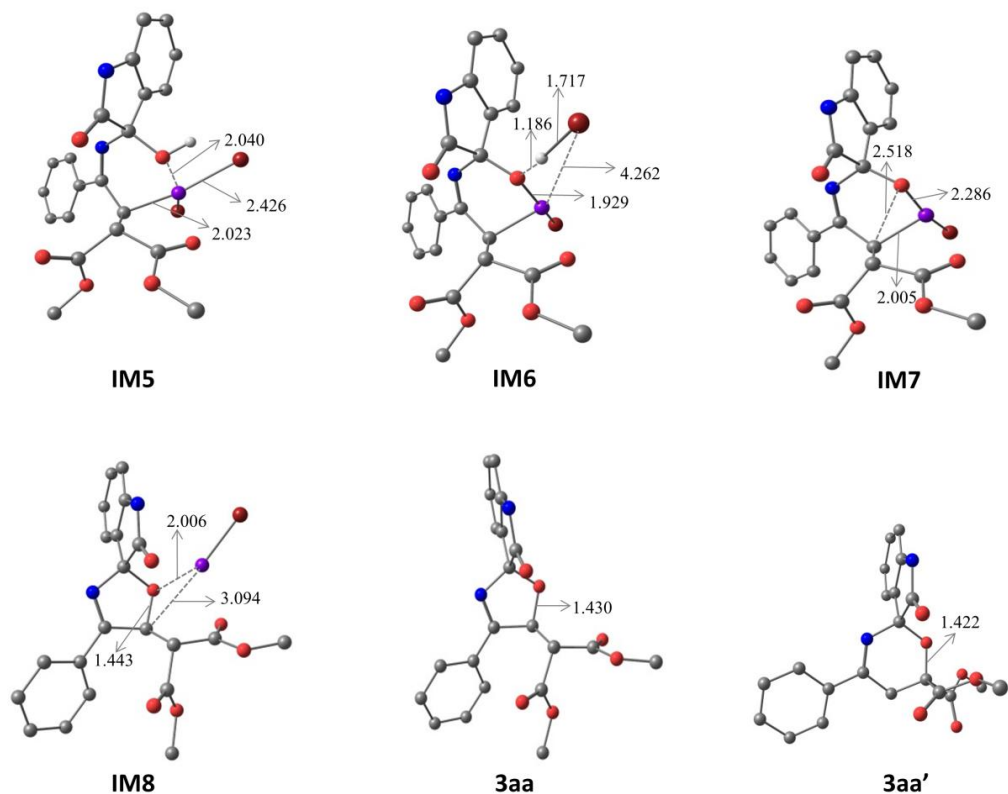

**Figure S1.** Optimized structures of intermediates and transition states according to scheme 5. The key bond distances are given in Å. Some hydrogen atoms are omitted for clarity (color code, C: gray, H: white, O: red, N: blue, Cu: purple, Br: dark red).

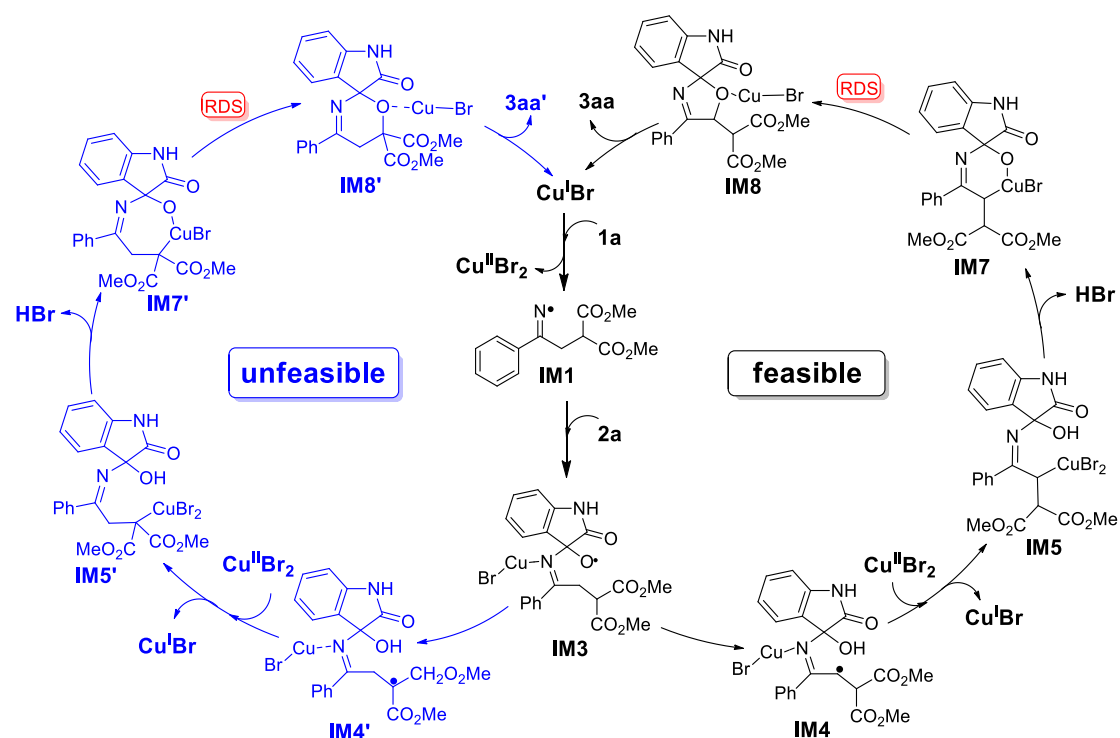

**Figure S2.** The proposed whole catalytic cycle of the two pathways.

## Coordinates and energies of the calculated structures

**Table S2.** Coordinates and energies (in hartree) of the calculated structures at the BP86+D3(BJ)/def2-TZVPP(SMD,solvent=Acetonitrile)//BP86+D3(BJ)/def2-SVP(SMD, solvent=Acetonitrile) level.

|                 |           |           |           |                 |           |           |           |
|-----------------|-----------|-----------|-----------|-----------------|-----------|-----------|-----------|
| <b>1a</b>       |           |           |           | H               | 0.361274  | 3.264450  | -0.351704 |
| E=-1088.437242  |           |           |           | H               | -0.024738 | 3.000622  | -2.059521 |
| G= -1088.196725 |           |           |           | H               | -0.439172 | 4.596708  | -1.305170 |
| N               | -0.677146 | 0.937807  | -0.491782 |                 |           |           |           |
| C               | -0.833739 | -0.333679 | -0.291441 |                 |           |           |           |
| C               | -2.112252 | -1.050593 | -0.032287 |                 |           |           |           |
| C               | -3.064974 | -0.545813 | 0.885452  |                 |           |           |           |
| C               | -2.365813 | -2.285537 | -0.674692 |                 |           |           |           |
| C               | -4.243735 | -1.260587 | 1.145828  |                 |           |           |           |
| H               | -2.872616 | 0.402712  | 1.405477  |                 |           |           |           |
| C               | -3.555786 | -2.987401 | -0.424286 |                 |           |           |           |
| H               | -1.634813 | -2.691675 | -1.390291 |                 |           |           |           |
| C               | -4.496903 | -2.478503 | 0.487919  |                 |           |           |           |
| H               | -4.972186 | -0.862026 | 1.869591  |                 |           |           |           |
| H               | -3.746192 | -3.939890 | -0.943588 |                 |           |           |           |
| H               | -5.427361 | -3.032585 | 0.689686  |                 |           |           |           |
| C               | 0.441263  | -1.143071 | -0.302378 |                 |           |           |           |
| H               | 0.369906  | -1.934953 | -1.077043 |                 |           |           |           |
| H               | 0.514367  | -1.680536 | 0.667042  |                 |           |           |           |
| C               | 1.720055  | -0.331350 | -0.548644 |                 |           |           |           |
| H               | 1.665816  | 0.177584  | -1.534305 |                 |           |           |           |
| C               | 1.954715  | 0.781071  | 0.474209  |                 |           |           |           |
| O               | 2.348647  | 1.906510  | 0.221606  |                 |           |           |           |
| O               | 1.690234  | 0.337074  | 1.723718  |                 |           |           |           |
| C               | 1.859736  | 1.298138  | 2.783336  |                 |           |           |           |
| H               | 2.897557  | 1.687695  | 2.800582  |                 |           |           |           |
| H               | 1.155078  | 2.145392  | 2.656774  |                 |           |           |           |
| H               | 1.637808  | 0.758540  | 3.721937  |                 |           |           |           |
| C               | 2.920434  | -1.282641 | -0.624706 |                 |           |           |           |
| O               | 2.854730  | -2.450165 | -0.968852 |                 |           |           |           |
| O               | 4.064941  | -0.656658 | -0.289351 |                 |           |           |           |
| C               | 5.270248  | -1.448881 | -0.359004 |                 |           |           |           |
| H               | 6.090173  | -0.777961 | -0.045598 |                 |           |           |           |
| H               | 5.204833  | -2.319895 | 0.323639  |                 |           |           |           |
| H               | 5.442526  | -1.807108 | -1.393906 |                 |           |           |           |
| O               | -1.893959 | 1.660902  | -0.483555 |                 |           |           |           |
| C               | -1.753067 | 3.009815  | -0.777132 |                 |           |           |           |
| O               | -2.769419 | 3.673266  | -0.730510 |                 |           |           |           |
| C               | -0.380787 | 3.505840  | -1.138104 |                 |           |           |           |
|                 |           |           |           | <b>2a</b>       |           |           |           |
|                 |           |           |           | E= -513.3241728 |           |           |           |
|                 |           |           |           | G= -513.2447678 |           |           |           |
|                 |           |           |           | C               | 0.000000  | 0.641229  | 0.000000  |
|                 |           |           |           | C               | 0.675741  | -0.611588 | 0.000000  |
|                 |           |           |           | C               | 2.073219  | -0.676102 | 0.000000  |
|                 |           |           |           | C               | 2.781236  | 0.544784  | 0.000000  |
|                 |           |           |           | C               | 2.122888  | 1.793718  | 0.000000  |
|                 |           |           |           | C               | 0.718037  | 1.847724  | 0.000000  |
|                 |           |           |           | C               | -1.444803 | 0.360850  | 0.000000  |
|                 |           |           |           | C               | -1.553107 | -1.215863 | 0.000000  |
|                 |           |           |           | H               | 2.600508  | -1.641567 | 0.000000  |
|                 |           |           |           | H               | 3.882601  | 0.516698  | 0.000000  |
|                 |           |           |           | H               | 2.713169  | 2.722559  | 0.000000  |
|                 |           |           |           | H               | 0.180356  | 2.808833  | 0.000000  |
|                 |           |           |           | H               | 0.015117  | -2.660516 | 0.000000  |
|                 |           |           |           | O               | -2.410251 | 1.110190  | 0.000000  |
|                 |           |           |           | O               | -2.577240 | -1.881720 | 0.000000  |
|                 |           |           |           | N               | -0.247299 | -1.668896 | 0.000000  |
|                 |           |           |           | <b>CuBr</b>     |           |           |           |
|                 |           |           |           | E= -4215.297424 |           |           |           |
|                 |           |           |           | G= -4215.321293 |           |           |           |
|                 |           |           |           | Cu              | 0.000000  | 0.000000  | -1.233686 |
|                 |           |           |           | Br              | 0.000000  | 0.000000  | 1.022197  |
|                 |           |           |           | <b>CuBr2</b>    |           |           |           |
|                 |           |           |           | E= -6789.745039 |           |           |           |
|                 |           |           |           | G= -6789.775208 |           |           |           |
|                 |           |           |           | Cu              | 0.000000  | 0.000000  | 0.927923  |
|                 |           |           |           | Br              | 0.000000  | -1.911772 | -0.384425 |
|                 |           |           |           | Br              | 0.000000  | 1.911772  | -0.384425 |
|                 |           |           |           | <b>HBr</b>      |           |           |           |
|                 |           |           |           | E= -2575.039245 |           |           |           |



|                 |           |           |           |                 |           |           |           |
|-----------------|-----------|-----------|-----------|-----------------|-----------|-----------|-----------|
| G= -2575.052665 |           |           |           | C               | -2.433428 | -1.234831 | 0.218098  |
| Br              | 0.000000  | 0.000000  | 0.039965  | O               | -2.168786 | -2.348817 | -0.199790 |
| H               | 0.000000  | 0.000000  | -1.398789 | O               | -3.683891 | -0.752955 | 0.352765  |
|                 |           |           |           | C               | -4.754914 | -1.639588 | -0.037197 |
| <b>AcOCu</b>    |           |           |           | H               | -5.689805 | -1.076807 | 0.135543  |
| E= -1869.423243 |           |           |           | H               | -4.664218 | -1.913915 | -1.107502 |
| G= -1869.405717 |           |           |           | H               | -4.742998 | -2.560903 | 0.579169  |
| O               | 0.244121  | -0.829896 | 0.000239  |                 |           |           |           |
| C               | 1.372308  | -0.159405 | -0.000117 | <b>IM2</b>      |           |           |           |
| O               | 2.481318  | -0.712731 | -0.000115 | E= -5588.528486 |           |           |           |
| C               | 1.252827  | 1.371081  | -0.000042 | G= -5588.238552 |           |           |           |
| H               | 0.677156  | 1.707102  | -0.889050 | N               | -0.253875 | 0.298690  | 0.515765  |
| H               | 0.685937  | 1.707056  | 0.894643  | C               | 0.961267  | 0.486677  | 0.837466  |
| H               | 2.251327  | 1.852416  | -0.004509 | C               | 1.524661  | 1.874325  | 0.919934  |
| Cu              | -1.419612 | -0.006745 | -0.000039 | C               | 0.961772  | 2.902434  | 0.126513  |
|                 |           |           |           | C               | 2.613151  | 2.173651  | 1.769427  |
|                 |           |           |           | C               | 1.480503  | 4.202355  | 0.180156  |
| <b>IM1</b>      |           |           |           | H               | 0.123496  | 2.664664  | -0.547081 |
| E= -859.8299892 |           |           |           | C               | 3.125141  | 3.480374  | 1.824710  |
| G= -859.6357832 |           |           |           | H               | 3.058072  | 1.391100  | 2.400425  |
| N               | 0.854047  | 1.341398  | 1.321002  | C               | 2.564154  | 4.495725  | 1.030382  |
| C               | 1.123077  | 0.300662  | 0.644708  | H               | 1.042033  | 4.991365  | -0.450895 |
| C               | 2.531721  | -0.041787 | 0.251050  | H               | 3.971286  | 3.704059  | 2.493021  |
| C               | 3.593213  | 0.796074  | 0.670683  | H               | 2.973609  | 5.517441  | 1.070334  |
| C               | 2.820570  | -1.182046 | -0.531080 | C               | 1.880375  | -0.712852 | 1.045707  |
| C               | 4.914853  | 0.497814  | 0.314946  | H               | 1.283588  | -1.582807 | 1.378461  |
| H               | 3.366674  | 1.684377  | 1.280851  | H               | 2.641146  | -0.492733 | 1.818383  |
| C               | 4.148473  | -1.476525 | -0.885478 | C               | 2.572105  | -1.083349 | -0.283160 |
| H               | 2.013976  | -1.847410 | -0.871461 | H               | 1.801956  | -1.387631 | -1.018681 |
| C               | 5.197107  | -0.640717 | -0.465037 | C               | 3.328284  | 0.087927  | -0.910570 |
| H               | 5.732569  | 1.156428  | 0.647889  | O               | 2.986906  | 0.684892  | -1.916131 |
| H               | 4.362411  | -2.368212 | -1.495567 | O               | 4.418698  | 0.397127  | -0.175333 |
| H               | 6.236460  | -0.875317 | -0.744307 | C               | 5.178237  | 1.540643  | -0.617994 |
| C               | -0.001948 | -0.634512 | 0.206280  | H               | 5.631415  | 1.345036  | -1.611003 |
| H               | 0.216101  | -1.650789 | 0.593683  | H               | 4.530398  | 2.437317  | -0.680776 |
| H               | 0.022645  | -0.705320 | -0.900688 | H               | 5.968813  | 1.691257  | 0.138800  |
| C               | -1.395733 | -0.201953 | 0.674609  | C               | 3.503120  | -2.278733 | -0.086707 |
| H               | -1.442075 | -0.166099 | 1.783194  | O               | 3.698239  | -2.860807 | 0.965320  |
| C               | -1.804223 | 1.193738  | 0.194897  | O               | 4.081998  | -2.609432 | -1.259943 |
| O               | -2.307491 | 2.063037  | 0.881849  | C               | 5.005688  | -3.717837 | -1.223650 |
| O               | -1.555168 | 1.319864  | -1.129133 | H               | 5.383991  | -3.830253 | -2.255684 |
| C               | -1.895482 | 2.591306  | -1.716861 | H               | 5.843952  | -3.506193 | -0.529454 |
| H               | -2.980358 | 2.794977  | -1.611170 | H               | 4.490455  | -4.645520 | -0.902262 |
| H               | -1.322839 | 3.409285  | -1.234569 | C               | -2.852252 | -1.932341 | 1.068674  |
| H               | -1.623912 | 2.515068  | -2.785319 |                 |           |           |           |

|            |              |           |           |            |              |           |           |
|------------|--------------|-----------|-----------|------------|--------------|-----------|-----------|
| C          | -3.165671    | -1.945405 | -0.320701 | H          | 3.482310     | 2.979006  | -1.033682 |
| C          | -4.421071    | -1.543078 | -0.782296 | H          | 4.919161     | 3.058942  | 0.074124  |
| C          | -5.360456    | -1.118354 | 0.180580  | C          | 4.283686     | -1.565984 | 0.467953  |
| C          | -5.062860    | -1.096519 | 1.559865  | O          | 4.514640     | -1.882301 | 1.621731  |
| C          | -3.796918    | -1.504588 | 2.014695  | O          | 5.135040     | -1.763244 | -0.560117 |
| C          | -1.451384    | -2.359517 | 1.207930  | C          | 6.404030     | -2.365702 | -0.228124 |
| C          | -0.958844    | -2.622836 | -0.268531 | H          | 6.961555     | -2.440057 | -1.179155 |
| H          | -4.658624    | -1.535083 | -1.855571 | H          | 6.959653     | -1.733029 | 0.493291  |
| H          | -6.353271    | -0.785828 | -0.160816 | H          | 6.256178     | -3.373932 | 0.208702  |
| H          | -5.823216    | -0.751935 | 2.276933  | C          | -2.279526    | -1.885620 | 0.538169  |
| H          | -3.537287    | -1.487719 | 3.084634  | C          | -2.734822    | -2.389811 | -0.701541 |
| H          | -2.040313    | -2.436179 | -2.091881 | C          | -4.096005    | -2.565460 | -0.971916 |
| O          | -0.753480    | -2.518428 | 2.199734  | C          | -5.010633    | -2.228893 | 0.047448  |
| O          | 0.152898     | -2.998874 | -0.617030 | C          | -4.575106    | -1.740729 | 1.293911  |
| N          | -2.051176    | -2.364418 | -1.068860 | C          | -3.200189    | -1.566093 | 1.549671  |
| Cu         | -1.825911    | 0.816998  | -0.189391 | C          | -0.719889    | -1.895263 | 0.578003  |
| Br         | -3.420023    | 2.078250  | -1.211440 | C          | -0.429718    | -2.418701 | -0.974787 |
|            |              |           |           | H          | -4.436298    | -2.953442 | -1.943540 |
| <b>IM3</b> |              |           |           | H          | -6.088574    | -2.352943 | -0.141204 |
| E=         | -5588.517259 |           |           | H          | -5.311647    | -1.486886 | 2.071285  |
| G=         | -5588.226112 |           |           | H          | -2.847437    | -1.191929 | 2.523780  |
| N          | -0.351140    | -0.421709 | 0.482434  | H          | -1.734421    | -3.090964 | -2.474402 |
| C          | 0.809369     | 0.118207  | 0.724673  | O          | -0.128890    | -2.637329 | 1.456354  |
| C          | 0.893756     | 1.588337  | 0.525257  | O          | 0.672763     | -2.568567 | -1.469098 |
| C          | 0.243050     | 2.172217  | -0.591751 | N          | -1.643928    | -2.670574 | -1.541534 |
| C          | 1.589304     | 2.418735  | 1.432759  | Cu         | -1.983769    | 0.526822  | 0.081891  |
| C          | 0.269342     | 3.561416  | -0.781187 | Br         | -3.770554    | 1.908003  | -0.317644 |
| H          | -0.222117    | 1.520061  | -1.348230 |            |              |           |           |
| C          | 1.603765     | 3.808721  | 1.243648  | <b>TS1</b> |              |           |           |
| H          | 2.098919     | 1.977821  | 2.302171  | E=         | -5588.512149 |           |           |
| C          | 0.942251     | 4.382548  | 0.140753  | G=         | -5588.220106 |           |           |
| H          | -0.230740    | 4.001747  | -1.657519 | N          | -0.355715    | -0.414575 | 0.422516  |
| H          | 2.134066     | 4.450828  | 1.963913  | C          | 0.788437     | 0.122182  | 0.670310  |
| H          | 0.963045     | 5.473828  | -0.006516 | C          | 0.876608     | 1.609569  | 0.539159  |
| C          | 2.040787     | -0.640415 | 1.150891  | C          | 0.264983     | 2.239846  | -0.571344 |
| H          | 1.733382     | -1.613738 | 1.573104  | C          | 1.520752     | 2.395394  | 1.520100  |
| H          | 2.577309     | -0.053350 | 1.923022  | C          | 0.288379     | 3.636970  | -0.690760 |
| C          | 3.000946     | -0.903988 | -0.032700 | H          | -0.188293    | 1.621659  | -1.361790 |
| H          | 2.506658     | -1.596425 | -0.743902 | C          | 1.532754     | 3.793467  | 1.399339  |
| C          | 3.338235     | 0.354469  | -0.833483 | H          | 1.997978     | 1.914429  | 2.387012  |
| O          | 2.962544     | 0.587844  | -1.968523 | C          | 0.915602     | 4.416305  | 0.297640  |
| O          | 4.092325     | 1.197377  | -0.094273 | H          | -0.181944    | 4.117835  | -1.562413 |
| C          | 4.407204     | 2.465582  | -0.704436 | H          | 2.027818     | 4.402326  | 2.171862  |
| H          | 5.076779     | 2.320833  | -1.576676 | H          | 0.932816     | 5.513708  | 0.205581  |

|                 |           |           |           |   |           |           |           |
|-----------------|-----------|-----------|-----------|---|-----------|-----------|-----------|
| C               | 2.018781  | -0.664034 | 1.067246  | C | 0.302085  | 2.558081  | -0.331557 |
| H               | 1.711955  | -1.654911 | 1.449629  | C | 1.828564  | 2.402376  | 1.569202  |
| H               | 2.548046  | -0.118312 | 1.873863  | C | 0.491241  | 3.945773  | -0.368171 |
| C               | 2.990309  | -0.871883 | -0.117071 | H | -0.332241 | 2.069921  | -1.090237 |
| H               | 2.528081  | -1.571809 | -0.840978 | C | 2.004835  | 3.794350  | 1.534023  |
| C               | 3.289706  | 0.412511  | -0.890478 | H | 2.352791  | 1.807212  | 2.330569  |
| O               | 2.905261  | 0.657481  | -2.020355 | C | 1.337649  | 4.569006  | 0.568400  |
| O               | 4.017328  | 1.261342  | -0.132831 | H | -0.019892 | 4.543824  | -1.138691 |
| C               | 4.281704  | 2.557124  | -0.708188 | H | 2.670632  | 4.276017  | 2.266825  |
| H               | 4.941461  | 2.461455  | -1.594451 | H | 1.484730  | 5.660088  | 0.538577  |
| H               | 3.334877  | 3.048945  | -1.006957 | C | 1.917266  | -0.581607 | 1.014179  |
| H               | 4.786155  | 3.142741  | 0.080976  | H | 1.237795  | -1.683401 | 1.248273  |
| C               | 4.293173  | -1.500225 | 0.377408  | H | 2.469473  | -0.304848 | 1.931755  |
| O               | 4.533462  | -1.820023 | 1.528293  | C | 2.819181  | -0.909855 | -0.163968 |
| O               | 5.150532  | -1.660397 | -0.651770 | H | 2.214738  | -1.374588 | -0.974527 |
| C               | 6.438347  | -2.224306 | -0.324220 | C | 3.429413  | 0.371518  | -0.764022 |
| H               | 7.002863  | -2.260686 | -1.273307 | O | 3.151916  | 0.832371  | -1.854941 |
| H               | 6.967742  | -1.586798 | 0.412439  | O | 4.283226  | 0.934370  | 0.113799  |
| H               | 6.323608  | -3.245440 | 0.092121  | C | 4.876227  | 2.187780  | -0.289568 |
| C               | -2.298173 | -2.046036 | 0.588647  | H | 4.089288  | 2.919584  | -0.558845 |
| C               | -2.618476 | -2.252418 | -0.778781 | H | 5.451131  | 2.543947  | 0.583756  |
| C               | -3.940446 | -2.179708 | -1.238248 | H | 5.551488  | 2.034853  | -1.155601 |
| C               | -4.944167 | -1.913615 | -0.285709 | C | 3.921179  | -1.887592 | 0.241338  |
| C               | -4.642203 | -1.730031 | 1.078400  | O | 3.997481  | -2.454315 | 1.317041  |
| C               | -3.307989 | -1.792807 | 1.527908  | O | 4.790437  | -2.050354 | -0.774618 |
| C               | -0.790068 | -2.219312 | 0.754955  | C | 5.890406  | -2.955323 | -0.535721 |
| C               | -0.321898 | -2.617183 | -0.726885 | H | 6.492330  | -2.949553 | -1.462087 |
| H               | -4.181279 | -2.330221 | -2.300990 | H | 6.501531  | -2.607875 | 0.321435  |
| H               | -5.990693 | -1.846451 | -0.621496 | H | 5.515626  | -3.977875 | -0.328559 |
| H               | -5.452670 | -1.526657 | 1.794459  | C | -2.098033 | -1.900077 | 0.742243  |
| H               | -3.051935 | -1.649845 | 2.589249  | C | -2.758694 | -2.402208 | -0.404047 |
| H               | -1.454275 | -2.790827 | -2.503192 | C | -4.133767 | -2.661117 | -0.394763 |
| O               | -0.222650 | -2.673850 | 1.769171  | C | -4.832433 | -2.411528 | 0.804105  |
| O               | 0.798206  | -2.948227 | -1.083912 | C | -4.180806 | -1.918665 | 1.952893  |
| N               | -1.454197 | -2.541490 | -1.507250 | C | -2.796241 | -1.657898 | 1.928252  |
| Cu              | -2.023274 | 0.406515  | 0.090162  | C | -0.635350 | -1.662336 | 0.400810  |
| Br              | -3.729480 | 1.877168  | -0.320529 | C | -0.574113 | -2.146159 | -1.121342 |
|                 |           |           |           | H | -4.647566 | -3.039619 | -1.290821 |
| <b>TS2</b>      |           |           |           | H | -5.916097 | -2.605952 | 0.838481  |
| E= -5588.501421 |           |           |           | H | -4.757939 | -1.733424 | 2.871744  |
| G= -5588.211665 |           |           |           | H | -2.271392 | -1.267651 | 2.813954  |
| N               | -0.411448 | -0.188522 | 0.358046  | H | -2.083754 | -2.930980 | -2.380319 |
| C               | 0.754469  | 0.301964  | 0.681101  | O | 0.218084  | -2.360254 | 1.218078  |
| C               | 0.959509  | 1.772304  | 0.647720  | O | 0.424136  | -2.188180 | -1.830289 |

|            |              |           |           |            |              |           |           |
|------------|--------------|-----------|-----------|------------|--------------|-----------|-----------|
| N          | -1.844901    | -2.540835 | -1.461722 | C          | -2.243265    | -1.692610 | 1.852178  |
| Cu         | -2.009280    | 0.720341  | -0.160869 | C          | -0.081226    | -1.544173 | 0.318058  |
| Br         | -3.942768    | 1.779260  | -0.707256 | C          | 0.086123     | -2.268451 | -1.090207 |
| <b>IM4</b> |              |           |           | H          | -3.781621    | -3.832134 | -1.104196 |
| E=         | -5588.521709 |           |           | H          | -5.135866    | -3.325437 | 0.958177  |
| G=         | -5588.226823 |           |           | H          | -4.167233    | -1.984158 | 2.829806  |
| N          | -0.154745    | -0.081739 | 0.110266  | H          | -1.811846    | -1.085445 | 2.663019  |
| C          | 0.823530     | 0.813058  | 0.408014  | H          | -1.251942    | -3.434724 | -2.225908 |
| C          | 0.299879     | 2.190162  | 0.718565  | O          | 0.838192     | -1.972006 | 1.264446  |
| C          | -0.522049    | 2.863733  | -0.214499 | O          | 1.106548     | -2.290415 | -1.773402 |
| C          | 0.596449     | 2.806862  | 1.950934  | N          | -1.102176    | -2.882931 | -1.373754 |
| C          | -1.049640    | 4.129083  | 0.091366  | Cu         | -1.925397    | 0.450081  | -0.322963 |
| H          | -0.723690    | 2.408758  | -1.198707 | Br         | -4.055522    | 0.997388  | -0.911699 |
| C          | 0.061999     | 4.071877  | 2.255127  | <b>IM5</b> |              |           |           |
| H          | 1.232944     | 2.283897  | 2.682260  | E=         | -8162.987632 |           |           |
| C          | -0.764760    | 4.733193  | 1.329360  | G=         | -8162.692903 |           |           |
| H          | -1.686224    | 4.644288  | -0.645005 | N          | 0.573673     | 1.465343  | 0.890489  |
| H          | 0.288565     | 4.538823  | 3.226813  | C          | -0.574989    | 1.342827  | 0.283326  |
| H          | -1.184081    | 5.722705  | 1.570990  | C          | -1.201461    | 2.599955  | -0.222015 |
| C          | 2.212780     | 0.663692  | 0.413543  | C          | -0.396581    | 3.750898  | -0.400435 |
| H          | 1.721805     | -2.241798 | 0.891586  | C          | -2.582921    | 2.677551  | -0.515477 |
| H          | 2.789008     | 1.515534  | 0.805561  | C          | -0.959592    | 4.947364  | -0.862337 |
| C          | 3.013444     | -0.394834 | -0.279879 | H          | 0.678839     | 3.680426  | -0.178894 |
| H          | 2.357842     | -1.102733 | -0.838395 | C          | -3.145954    | 3.880102  | -0.970969 |
| C          | 3.965674     | 0.150364  | -1.358592 | H          | -3.232686    | 1.802239  | -0.370528 |
| O          | 4.793931     | -0.543414 | -1.921396 | C          | -2.337122    | 5.016119  | -1.149051 |
| O          | 3.737160     | 1.445303  | -1.630607 | H          | -0.320653    | 5.832750  | -1.007517 |
| C          | 4.545182     | 2.027886  | -2.678224 | H          | -4.224654    | 3.928406  | -1.186987 |
| H          | 4.374910     | 1.500482  | -3.638188 | H          | -2.778891    | 5.956733  | -1.514351 |
| H          | 4.220652     | 3.080937  | -2.756262 | C          | -1.288923    | 0.064398  | 0.032390  |
| H          | 5.620425     | 1.974464  | -2.414743 | H          | -2.108875    | 0.147414  | -0.694866 |
| C          | 3.815187     | -1.242148 | 0.706596  | C          | -1.688635    | -0.776008 | 1.240681  |
| O          | 3.470027     | -2.368812 | 1.055251  | H          | -0.970016    | -0.666413 | 2.081165  |
| O          | 4.890892     | -0.608777 | 1.172502  | C          | -3.046601    | -0.294500 | 1.790945  |
| C          | 5.693637     | -1.319069 | 2.147439  | O          | -3.234919    | 0.090413  | 2.927403  |
| H          | 6.504553     | -0.624380 | 2.428575  | O          | -3.989581    | -0.358820 | 0.830549  |
| H          | 5.080994     | -1.580321 | 3.032824  | C          | -5.318505    | 0.067727  | 1.210036  |
| H          | 6.113644     | -2.240979 | 1.698919  | H          | -5.298863    | 1.114093  | 1.574180  |
| C          | -1.499048    | -1.975358 | 0.703584  | H          | -5.931314    | -0.011048 | 0.294732  |
| C          | -2.049686    | -2.745970 | -0.342584 | H          | -5.722874    | -0.592960 | 2.002609  |
| C          | -3.355593    | -3.242481 | -0.278962 | C          | -1.744541    | -2.254256 | 0.875990  |
| C          | -4.102882    | -2.951050 | 0.881244  | O          | -1.133099    | -2.727833 | -0.081653 |
| C          | -3.558841    | -2.193937 | 1.936666  | O          | -2.480765    | -2.967203 | 1.719576  |



|    |           |           |           |            |              |           |           |
|----|-----------|-----------|-----------|------------|--------------|-----------|-----------|
| C  | 2.537503  | 4.611205  | -0.855115 | Br         | -3.608068    | -2.061946 | 0.097122  |
| H  | 0.520228  | 3.785599  | -0.787421 | Br         | 1.334089     | 0.440513  | 3.204851  |
| C  | 4.349980  | 2.990934  | -0.706588 |            |              |           |           |
| H  | 3.772759  | 0.912295  | -0.542937 | <b>IM7</b> |              |           |           |
| C  | 3.915999  | 4.322929  | -0.823233 | E=         | -5587.903381 |           |           |
| H  | 2.193264  | 5.654008  | -0.939466 | G=         | -5587.616682 |           |           |
| H  | 5.425928  | 2.757793  | -0.687751 | N          | -1.110235    | 0.969035  | -0.887246 |
| H  | 4.652282  | 5.139648  | -0.887657 | C          | 0.059187     | 1.164044  | -0.348863 |
| C  | 1.426393  | -0.151577 | 0.007791  | C          | 0.501966     | 2.577682  | -0.148840 |
| H  | 2.353626  | -0.106408 | 0.600447  | C          | -0.446138    | 3.622438  | -0.278746 |
| C  | 1.328272  | -1.408446 | -0.831313 | C          | 1.844741     | 2.908831  | 0.151857  |
| H  | 0.498480  | -1.343009 | -1.565796 | C          | -0.059977    | 4.958632  | -0.116271 |
| C  | 2.619692  | -1.587669 | -1.664126 | H          | -1.489601    | 3.358413  | -0.505571 |
| O  | 2.639495  | -1.681923 | -2.873840 | C          | 2.228503     | 4.250228  | 0.312774  |
| O  | 3.696562  | -1.622323 | -0.860239 | H          | 2.606981     | 2.122885  | 0.250614  |
| C  | 4.977872  | -1.806195 | -1.510415 | C          | 1.279848     | 5.278373  | 0.180120  |
| H  | 5.142309  | -1.014569 | -2.267592 | H          | -0.809568    | 5.759690  | -0.215425 |
| H  | 5.732358  | -1.738040 | -0.707138 | H          | 3.278715     | 4.490231  | 0.541001  |
| H  | 5.019345  | -2.801729 | -1.995282 | H          | 1.581835     | 6.329737  | 0.309475  |
| C  | 1.069002  | -2.653458 | 0.023104  | C          | 0.984780     | 0.081244  | 0.085165  |
| O  | 0.570552  | -2.618090 | 1.146122  | H          | 1.711262     | 0.378801  | 0.860974  |
| O  | 1.399111  | -3.768760 | -0.614707 | C          | 1.605878     | -0.784009 | -0.997005 |
| C  | 1.125207  | -5.021119 | 0.067564  | H          | 0.889045     | -0.940285 | -1.830023 |
| H  | 1.455869  | -5.812969 | -0.626742 | C          | 2.835719     | -0.080167 | -1.605288 |
| H  | 1.695634  | -5.070441 | 1.015498  | O          | 2.940317     | 0.239340  | -2.772198 |
| H  | 0.040647  | -5.109976 | 0.273409  | O          | 3.766804     | 0.139070  | -0.655682 |
| C  | -2.480036 | 1.486004  | -0.295454 | C          | 4.981845     | 0.791867  | -1.092303 |
| C  | -3.461813 | 1.550433  | -1.305815 | H          | 5.522299     | 0.149783  | -1.816134 |
| C  | -4.641743 | 2.280992  | -1.129003 | H          | 4.749319     | 1.767352  | -1.563655 |
| C  | -4.810551 | 2.951191  | 0.101297  | H          | 5.588242     | 0.937496  | -0.180967 |
| C  | -3.833407 | 2.891275  | 1.114402  | C          | 1.993061     | -2.167588 | -0.469255 |
| C  | -2.645936 | 2.154596  | 0.916625  | O          | 1.528499     | -2.671936 | 0.547666  |
| C  | -1.331563 | 0.613728  | -0.783372 | O          | 2.864967     | -2.770896 | -1.275471 |
| C  | -1.868364 | 0.146740  | -2.231443 | C          | 3.274526     | -4.111755 | -0.906943 |
| H  | -5.407353 | 2.327163  | -1.917676 | H          | 3.982977     | -4.431488 | -1.691013 |
| H  | -5.730995 | 3.532234  | 0.269602  | H          | 3.770391     | -4.101681 | 0.083532  |
| H  | -3.997167 | 3.421079  | 2.065338  | H          | 2.396048     | -4.786101 | -0.879332 |
| H  | -1.870952 | 2.097178  | 1.697849  | C          | -3.137103    | -0.209540 | -0.397068 |
| H  | -3.653597 | 0.611368  | -3.236603 | C          | -4.021810    | -0.382471 | -1.482869 |
| O  | -1.129915 | -0.558895 | -0.020063 | C          | -5.410356    | -0.322175 | -1.314043 |
| O  | -1.287683 | -0.632966 | -2.966024 | C          | -5.896194    | -0.080567 | -0.011133 |
| N  | -3.059157 | 0.789537  | -2.419062 | C          | -5.021259    | 0.092577  | 1.079164  |
| H  | -2.132281 | -1.183640 | 0.082997  | C          | -3.623773    | 0.032791  | 0.887757  |
| Cu | 0.056208  | -0.392632 | 1.492539  | C          | -1.698692    | -0.346397 | -0.898416 |

|    |           |           |           |   |           |           |           |
|----|-----------|-----------|-----------|---|-----------|-----------|-----------|
| C  | -1.940331 | -0.660752 | -2.467335 | H | -0.183581 | -5.038699 | -0.657358 |
| H  | -6.094837 | -0.458280 | -2.164769 | H | 1.172215  | -4.324315 | 0.309968  |
| H  | -6.984349 | -0.028788 | 0.151861  | C | 1.640040  | 2.336903  | -0.242597 |
| H  | -5.429154 | 0.276265  | 2.085188  | C | 2.680844  | 2.328324  | 0.713140  |
| H  | -2.927116 | 0.167670  | 1.731472  | C | 3.886115  | 2.999016  | 0.481850  |
| H  | -3.724798 | -0.828041 | -3.572483 | C | 4.021922  | 3.686033  | -0.743265 |
| O  | -0.991461 | -1.405832 | -0.389771 | C | 2.989077  | 3.700554  | -1.700801 |
| O  | -1.059197 | -0.902885 | -3.274576 | C | 1.779475  | 3.017142  | -1.452512 |
| N  | -3.293325 | -0.618037 | -2.665321 | C | 0.506786  | 1.490763  | 0.278998  |
| Cu | -0.137766 | -1.121796 | 1.231362  | C | 1.066596  | 0.990172  | 1.682685  |
| Br | 0.337043  | -0.593805 | 3.404264  | H | 4.697158  | 2.984964  | 1.224877  |

### IM8

E= -5587.94032

G= -5587.652316

|   |           |           |           |
|---|-----------|-----------|-----------|
| N | -0.776872 | 2.103028  | 0.421551  |
| C | -1.681153 | 1.317614  | -0.075804 |
| C | -3.117362 | 1.628264  | -0.072832 |
| C | -3.635342 | 2.521034  | 0.896888  |
| C | -3.989998 | 1.056734  | -1.029615 |
| C | -5.002376 | 2.823292  | 0.916392  |
| H | -2.948928 | 2.956770  | 1.638549  |
| C | -5.357923 | 1.370404  | -1.009275 |
| H | -3.602003 | 0.379663  | -1.804333 |
| C | -5.867208 | 2.247302  | -0.035179 |
| H | -5.401061 | 3.508689  | 1.680594  |
| H | -6.029328 | 0.928660  | -1.761710 |
| H | -6.942588 | 2.484593  | -0.016446 |
| C | -1.096180 | 0.015602  | -0.621752 |
| H | -1.377891 | -0.203168 | -1.670802 |
| C | -1.375408 | -1.203290 | 0.293427  |
| H | -1.029026 | -0.944410 | 1.316215  |
| C | -2.855967 | -1.575135 | 0.404737  |
| O | -3.534110 | -1.453780 | 1.406363  |
| O | -3.297752 | -2.071470 | -0.770602 |
| C | -4.688243 | -2.462682 | -0.811730 |
| H | -4.872422 | -3.301116 | -0.110495 |
| H | -5.338855 | -1.607180 | -0.542342 |
| H | -4.880894 | -2.782054 | -1.851273 |
| C | -0.561923 | -2.402273 | -0.186860 |
| O | 0.181047  | -2.396495 | -1.171357 |
| O | -0.712454 | -3.450014 | 0.625656  |
| C | 0.101983  | -4.611400 | 0.324129  |
| H | -0.098109 | -5.334547 | 1.134026  |

|    |          |           |           |
|----|----------|-----------|-----------|
| H  | 4.961843 | 4.221157  | -0.952064 |
| H  | 3.127707 | 4.244415  | -2.647699 |
| H  | 0.965432 | 3.010751  | -2.194031 |
| H  | 2.924778 | 1.347373  | 2.615940  |
| O  | 0.312932 | 0.325314  | -0.595521 |
| O  | 0.483895 | 0.243098  | 2.458365  |
| N  | 2.300715 | 1.566710  | 1.832200  |
| Cu | 1.830330 | -0.986518 | -0.557069 |
| Br | 3.913660 | -1.623719 | 0.028107  |

### 3aa

E= -1372.613174

G= -1372.320168

|   |           |           |           |
|---|-----------|-----------|-----------|
| N | -1.041922 | -1.239530 | 0.381871  |
| C | 0.134139  | -1.056528 | -0.129664 |
| C | 1.198879  | -2.072158 | -0.100436 |
| C | 1.204241  | -3.055924 | 0.917606  |
| C | 2.216219  | -2.084495 | -1.083442 |
| C | 2.216557  | -4.022686 | 0.959001  |
| H | 0.411158  | -3.035095 | 1.680427  |
| C | 3.223678  | -3.061744 | -1.042130 |
| H | 2.215809  | -1.337930 | -1.890753 |
| C | 3.230199  | -4.026998 | -0.019754 |
| H | 2.221808  | -4.776850 | 1.761711  |
| H | 4.008849  | -3.067892 | -1.814104 |
| H | 4.027290  | -4.786444 | 0.016130  |
| C | 0.289439  | 0.337738  | -0.728221 |
| H | 0.665473  | 0.342364  | -1.772138 |
| C | 1.173383  | 1.272035  | 0.142836  |
| H | 0.620632  | 1.441649  | 1.089169  |
| C | 2.525763  | 0.684340  | 0.547652  |
| O | 2.781325  | 0.219391  | 1.643485  |
| O | 3.406068  | 0.752294  | -0.475729 |

|                 |           |           |           |                 |           |           |           |
|-----------------|-----------|-----------|-----------|-----------------|-----------|-----------|-----------|
| C               | 4.722072  | 0.219568  | -0.215213 | C               | -2.191724 | 0.957490  | -1.099555 |
| H               | 5.239796  | 0.830645  | 0.551658  | H               | -2.237453 | 0.608243  | -2.153697 |
| H               | 4.654818  | -0.829327 | 0.134732  | H               | -2.553027 | 2.005891  | -1.128643 |
| H               | 5.265264  | 0.271302  | -1.175722 | C               | -3.110683 | 0.083682  | -0.261156 |
| C               | 1.383025  | 2.606798  | -0.571321 | H               | -2.439916 | -1.023920 | -0.284365 |
| O               | 1.159459  | 2.828372  | -1.748044 | C               | -3.278831 | 0.490338  | 1.176170  |
| O               | 1.873974  | 3.516188  | 0.295805  | O               | -4.119641 | 0.090518  | 1.963895  |
| C               | 2.180602  | 4.815312  | -0.254181 | O               | -2.331375 | 1.414011  | 1.508473  |
| H               | 2.571086  | 5.415548  | 0.587242  | C               | -2.257379 | 1.772027  | 2.896449  |
| H               | 2.945883  | 4.730756  | -1.052206 | H               | -3.196583 | 2.255873  | 3.234267  |
| H               | 1.269155  | 5.288834  | -0.671553 | H               | -2.063091 | 0.871970  | 3.512586  |
| C               | -3.214527 | -0.301275 | -0.364829 | H               | -1.413908 | 2.481785  | 2.982145  |
| C               | -4.142006 | 0.122490  | 0.612874  | C               | -4.342167 | -0.344326 | -1.008848 |
| C               | -5.521754 | -0.013304 | 0.419108  | O               | -4.596690 | 0.007506  | -2.156330 |
| C               | -5.953542 | -0.587462 | -0.795884 | O               | -5.102574 | -1.213167 | -0.314410 |
| C               | -5.036725 | -1.008769 | -1.778046 | C               | -6.295970 | -1.669491 | -0.978708 |
| C               | -3.647885 | -0.867224 | -1.563189 | H               | -6.788149 | -2.363329 | -0.273028 |
| C               | -1.813974 | -0.035537 | 0.148976  | H               | -6.970683 | -0.819691 | -1.208866 |
| C               | -2.095986 | 0.674248  | 1.541723  | H               | -6.047113 | -2.197038 | -1.922377 |
| H               | -6.239979 | 0.318297  | 1.183796  | C               | 0.849927  | -2.234104 | -0.570778 |
| H               | -7.034032 | -0.705136 | -0.975555 | C               | 1.466792  | -2.819185 | 0.565488  |
| H               | -5.404603 | -1.450219 | -2.717098 | C               | 2.644321  | -3.567739 | 0.444594  |
| H               | -2.919385 | -1.192593 | -2.322369 | C               | 3.183401  | -3.724348 | -0.846976 |
| H               | -3.921695 | 1.092465  | 2.527150  | C               | 2.573119  | -3.150775 | -1.983233 |
| O               | -1.057849 | 0.818079  | -0.723509 | C               | 1.390163  | -2.399336 | -1.851983 |
| O               | -1.253467 | 1.140558  | 2.298565  | C               | -0.362470 | -1.422224 | -0.123814 |
| N               | -3.458676 | 0.670962  | 1.714431  | C               | -0.331192 | -1.675687 | 1.462252  |
|                 |           |           |           | H               | 3.127454  | -4.012720 | 1.326704  |
| <b>TS2'</b>     |           |           |           | H               | 4.108672  | -4.309116 | -0.969568 |
| E= -5588.505453 |           |           |           | H               | 3.028116  | -3.288778 | -2.975936 |
| G= -5588.213314 |           |           |           | H               | 0.902698  | -1.940345 | -2.725801 |
| N               | 0.013679  | -0.003696 | -0.314021 | H               | 0.979574  | -2.835791 | 2.659816  |
| C               | -0.734633 | 0.992387  | -0.700039 | O               | -1.518414 | -1.851141 | -0.678575 |
| C               | -0.008579 | 2.285985  | -0.808479 | O               | -1.149130 | -1.261709 | 2.268248  |
| C               | 1.284693  | 2.311256  | -1.399663 | N               | 0.736745  | -2.509162 | 1.717572  |
| C               | -0.539020 | 3.472104  | -0.253502 | Cu              | 1.904053  | 0.250268  | 0.022156  |
| C               | 2.038060  | 3.498547  | -1.405398 | Br              | 4.121303  | 0.424554  | 0.567507  |
| H               | 1.648188  | 1.431470  | -1.960404 |                 |           |           |           |
| C               | 0.226038  | 4.648365  | -0.251088 | <b>IM4'</b>     |           |           |           |
| H               | -1.533163 | 3.453581  | 0.216589  | E= -5588.519311 |           |           |           |
| C               | 1.515621  | 4.662715  | -0.819566 | G= -5588.225748 |           |           |           |
| H               | 3.033273  | 3.507773  | -1.875342 | N               | 0.009096  | 0.017444  | -0.386639 |
| H               | -0.183630 | 5.561824  | 0.207599  | C               | -0.766617 | 0.997116  | -0.759166 |
| H               | 2.108293  | 5.590927  | -0.815220 | C               | -0.096303 | 2.320818  | -0.869566 |



|   |           |           |           |             |              |           |           |
|---|-----------|-----------|-----------|-------------|--------------|-----------|-----------|
| C | 1.216726  | 2.400302  | -1.405533 | N           | 0.673900     | -2.556549 | 1.575746  |
| C | -0.723512 | 3.501468  | -0.410186 | Cu          | 1.882801     | 0.272030  | 0.062441  |
| C | 1.892142  | 3.631101  | -1.449200 | Br          | 4.037914     | 0.389497  | 0.805037  |
| H | 1.673617  | 1.514446  | -1.880544 |             |              |           |           |
| C | -0.036635 | 4.724816  | -0.441973 | <b>IM5'</b> |              |           |           |
| H | -1.734898 | 3.448357  | 0.018075  | E=          | -8162.973752 |           |           |
| C | 1.272782  | 4.791871  | -0.955323 | G=          | -8162.679311 |           |           |
| H | 2.904397  | 3.679905  | -1.879403 | N           | 0.738390     | 1.660240  | 0.629872  |
| H | -0.525610 | 5.632701  | -0.055557 | C           | -0.531003    | 1.672214  | 0.857799  |
| H | 1.805718  | 5.755383  | -0.982280 | C           | -1.295922    | 2.829666  | 0.315452  |
| C | -2.226288 | 0.913547  | -1.172525 | C           | -0.734809    | 3.575003  | -0.750969 |
| H | -2.290254 | 0.400309  | -2.154640 | C           | -2.545485    | 3.230112  | 0.838765  |
| H | -2.554510 | 1.958346  | -1.376018 | C           | -1.403238    | 4.687337  | -1.276152 |
| C | -3.213772 | 0.275947  | -0.242347 | H           | 0.229916     | 3.246382  | -1.163400 |
| H | -2.215619 | -1.643832 | -0.320027 | C           | -3.209117    | 4.354239  | 0.320915  |
| C | -3.245367 | 0.646406  | 1.184579  | H           | -3.010154    | 2.674562  | 1.665357  |
| O | -4.082931 | 0.334532  | 2.021629  | C           | -2.644538    | 5.083499  | -0.739811 |
| O | -2.183887 | 1.461128  | 1.471889  | H           | -0.959060    | 5.248260  | -2.113827 |
| C | -2.009735 | 1.812951  | 2.849636  | H           | -4.177503    | 4.658756  | 0.748168  |
| H | -2.886537 | 2.373458  | 3.234259  | H           | -3.172334    | 5.958086  | -1.152423 |
| H | -1.862368 | 0.901065  | 3.463230  | C           | -1.270990    | 0.586480  | 1.652248  |
| H | -1.105623 | 2.448134  | 2.889147  | H           | -2.175249    | 1.032047  | 2.116749  |
| C | -4.277743 | -0.508896 | -0.899176 | H           | -0.609252    | 0.265224  | 2.475776  |
| O | -4.410409 | -0.554058 | -2.124768 | C           | -1.729130    | -0.623424 | 0.867417  |
| O | -5.073577 | -1.196488 | -0.049249 | C           | -1.607085    | -1.927960 | 1.593474  |
| C | -6.112582 | -1.975103 | -0.668031 | O           | -0.844351    | -2.776526 | 1.082809  |
| H | -6.645633 | -2.478148 | 0.159335  | O           | -2.263288    | -2.084658 | 2.714161  |
| H | -6.812485 | -1.325921 | -1.233455 | C           | -2.089151    | -3.350247 | 3.426012  |
| H | -5.684860 | -2.728168 | -1.361967 | H           | -2.435301    | -4.186229 | 2.788450  |
| C | 0.944757  | -2.171272 | -0.684680 | H           | -1.023253    | -3.482653 | 3.692926  |
| C | 1.488949  | -2.806072 | 0.457528  | H           | -2.713575    | -3.262000 | 4.330908  |
| C | 2.685148  | -3.527198 | 0.390208  | C           | -2.971487    | -0.517663 | 0.024266  |
| C | 3.328927  | -3.599989 | -0.861965 | O           | -3.615410    | 0.501653  | -0.139811 |
| C | 2.797099  | -2.970522 | -2.004502 | O           | -3.297902    | -1.729006 | -0.479173 |
| C | 1.593486  | -2.240783 | -1.921111 | C           | -4.437741    | -1.765807 | -1.361967 |
| C | -0.305708 | -1.409956 | -0.268143 | H           | -4.550965    | -2.822275 | -1.663431 |
| C | -0.402429 | -1.764505 | 1.273940  | H           | -5.349886    | -1.413523 | -0.839996 |
| H | 3.110977  | -4.007058 | 1.283512  | H           | -4.250650    | -1.130515 | -2.251021 |
| H | 4.274445  | -4.159120 | -0.942691 | C           | 2.941039     | 0.736776  | 0.177779  |
| H | 3.327388  | -3.043424 | -2.966315 | C           | 4.042721     | 1.046438  | 1.007210  |
| H | 1.173961  | -1.731213 | -2.802272 | C           | 5.339417     | 1.149666  | 0.490209  |
| H | 0.839562  | -2.946647 | 2.510085  | C           | 5.503410     | 0.939378  | -0.895799 |
| O | -1.457290 | -1.862617 | -0.916182 | C           | 4.408640     | 0.645568  | -1.731362 |
| O | -1.332009 | -1.438543 | 2.000672  | C           | 3.106743     | 0.545462  | -1.195212 |

|                 |           |           |           |                 |           |           |           |
|-----------------|-----------|-----------|-----------|-----------------|-----------|-----------|-----------|
| C               | 1.689549  | 0.691259  | 1.035443  | O               | -2.972204 | -2.444399 | -0.366458 |
| C               | 2.249701  | 1.089230  | 2.470769  | C               | -3.917475 | -2.785746 | -1.399053 |
| H               | 6.194088  | 1.392840  | 1.138905  | H               | -4.064411 | -3.877786 | -1.326578 |
| H               | 6.513332  | 1.013746  | -1.329520 | H               | -4.876769 | -2.251762 | -1.248675 |
| H               | 4.568680  | 0.491649  | -2.809647 | H               | -3.493779 | -2.517124 | -2.389565 |
| H               | 2.238998  | 0.314225  | -1.831720 | C               | 2.180823  | 1.585630  | -0.400580 |
| H               | 4.228814  | 1.456988  | 3.117457  | C               | 3.258430  | 2.238889  | 0.232410  |
| O               | 1.185777  | -0.671259 | 1.168059  | C               | 4.384061  | 2.654186  | -0.486039 |
| O               | 1.579048  | 1.201401  | 3.485834  | C               | 4.399737  | 2.394159  | -1.872802 |
| N               | 3.607759  | 1.233825  | 2.331992  | C               | 3.325146  | 1.747625  | -2.513795 |
| H               | 1.864814  | -1.279868 | 0.780101  | C               | 2.195360  | 1.341286  | -1.773225 |
| Cu              | -0.270682 | -1.395971 | -0.387509 | C               | 1.136729  | 1.241200  | 0.648441  |
| Br              | 1.502534  | -2.683702 | -1.321655 | C               | 1.795614  | 1.840969  | 1.984786  |
| Br              | -0.725531 | 0.010925  | -2.181461 | H               | 5.222739  | 3.162464  | 0.012356  |
|                 |           |           |           | H               | 5.274962  | 2.707255  | -2.463727 |
| <b>TS3'</b>     |           |           |           | H               | 3.366476  | 1.557617  | -3.597208 |
| E= -8162.945097 |           |           |           | H               | 1.347266  | 0.835677  | -2.263341 |
| G= -8162.65449  |           |           |           | H               | 3.655784  | 2.782127  | 2.282676  |
| N               | -0.077266 | 1.935910  | 0.406312  | O               | 1.005292  | -0.166381 | 0.873976  |
| C               | -1.278106 | 1.611241  | 0.748705  | O               | 1.290850  | 1.789881  | 3.093129  |
| C               | -2.374549 | 2.545859  | 0.383561  | N               | 2.997552  | 2.374322  | 1.609293  |
| C               | -2.062027 | 3.702830  | -0.375824 | H               | 2.030500  | -0.689923 | 0.829357  |
| C               | -3.717037 | 2.334656  | 0.774037  | Cu              | 0.048870  | -1.077901 | -0.532554 |
| C               | -3.059951 | 4.616891  | -0.730183 | Br              | 3.542643  | -1.563055 | 0.632418  |
| H               | -1.016411 | 3.863311  | -0.677922 | Br              | -0.360122 | -1.914306 | -2.614357 |
| C               | -4.715311 | 3.257131  | 0.426385  |                 |           |           |           |
| H               | -4.005170 | 1.440855  | 1.345672  | <b>IM6'</b>     |           |           |           |
| C               | -4.392737 | 4.398568  | -0.328492 | E= -8162.945537 |           |           |           |
| H               | -2.800248 | 5.507973  | -1.323104 | G= -8162.659525 |           |           |           |
| H               | -5.755083 | 3.076740  | 0.740453  | N               | 0.062657  | 1.873022  | -0.385826 |
| H               | -5.179935 | 5.116581  | -0.607869 | C               | 1.227991  | 1.550842  | -0.834607 |
| C               | -1.589843 | 0.332776  | 1.554233  | C               | 2.341294  | 2.509763  | -0.611308 |
| H               | -2.602471 | 0.433956  | 2.000603  | C               | 2.093389  | 3.675920  | 0.157993  |
| H               | -0.871908 | 0.274741  | 2.392305  | C               | 3.632194  | 2.319153  | -1.155075 |
| C               | -1.576583 | -0.944971 | 0.773616  | C               | 3.103409  | 4.619879  | 0.371316  |
| C               | -1.138923 | -2.189230 | 1.515161  | H               | 1.087478  | 3.820628  | 0.579461  |
| O               | -0.244715 | -2.917677 | 1.093139  | C               | 4.641579  | 3.271798  | -0.948857 |
| O               | -1.808948 | -2.365452 | 2.648608  | H               | 3.870399  | 1.422175  | -1.743969 |
| C               | -1.458885 | -3.538283 | 3.432134  | C               | 4.383260  | 4.422881  | -0.184222 |
| H               | -1.652760 | -4.458160 | 2.846258  | H               | 2.894101  | 5.518417  | 0.972841  |
| H               | -0.391052 | -3.495229 | 3.722593  | H               | 5.639636  | 3.108538  | -1.384227 |
| H               | -2.108073 | -3.502275 | 4.324144  | H               | 5.179270  | 5.165971  | -0.018503 |
| C               | -2.671864 | -1.137936 | -0.246898 | C               | 1.473790  | 0.247746  | -1.628839 |
| O               | -3.228121 | -0.228257 | -0.839294 | H               | 2.442289  | 0.337416  | -2.163938 |



|                 |           |           |           |                 |           |           |           |
|-----------------|-----------|-----------|-----------|-----------------|-----------|-----------|-----------|
| H               | 0.103806  | -2.571327 | 1.317100  | H               | 1.438077  | 6.521842  | 0.855796  |
|                 |           |           |           | H               | 1.939069  | 4.945665  | 2.728881  |
| <b>TS4'</b>     |           |           |           | H               | 1.644749  | 2.455638  | 2.406631  |
| E= -5587.877025 |           |           |           | H               | -0.052019 | 3.314811  | -2.707505 |
| G= -5587.592087 |           |           |           | O               | -0.282499 | 0.722812  | 0.668135  |
| N               | 1.966268  | 0.554508  | -0.227973 | O               | -0.192870 | 0.655695  | -2.374480 |
| C               | 2.154517  | -0.600034 | 0.318179  | N               | 0.262632  | 2.877295  | -1.833988 |
| C               | 3.509397  | -1.208683 | 0.192021  | Cu              | -1.923964 | 0.127659  | -0.031053 |
| C               | 4.617681  | -0.367308 | -0.074448 | Br              | -4.184957 | -0.035404 | -0.243499 |
| C               | 3.726042  | -2.600442 | 0.314090  | H               | 1.404383  | -2.399481 | 1.280839  |
| C               | 5.905662  | -0.902071 | -0.205248 |                 |           |           |           |
| H               | 4.442750  | 0.715030  | -0.167981 | <b>IM8'</b>     |           |           |           |
| C               | 5.017262  | -3.135877 | 0.175363  | E= -5587.929999 |           |           |           |
| H               | 2.880958  | -3.283585 | 0.484550  | G= -5587.644543 |           |           |           |
| C               | 6.110669  | -2.290196 | -0.080163 | N               | 1.934132  | 1.090705  | -0.099677 |
| H               | 6.758716  | -0.233442 | -0.401982 | C               | 2.693531  | 0.075851  | 0.165708  |
| H               | 5.167448  | -4.223454 | 0.262519  | C               | 4.167711  | 0.284517  | 0.167621  |
| H               | 7.123316  | -2.711421 | -0.183150 | C               | 4.690851  | 1.556410  | -0.172704 |
| C               | 1.094334  | -1.344539 | 1.124579  | C               | 5.067093  | -0.754502 | 0.504831  |
| H               | 1.008671  | -0.899278 | 2.135595  | C               | 6.072653  | 1.780946  | -0.180294 |
| C               | -0.257646 | -1.381839 | 0.475774  | H               | 3.986310  | 2.360920  | -0.431398 |
| C               | -0.243312 | -1.945034 | -0.943425 | C               | 6.452952  | -0.525323 | 0.499684  |
| O               | 0.745893  | -2.449270 | -1.445427 | H               | 4.694514  | -1.753186 | 0.775077  |
| O               | -1.445250 | -1.843075 | -1.520569 | C               | 6.960279  | 0.739628  | 0.156629  |
| C               | -1.566069 | -2.280107 | -2.888522 | H               | 6.464443  | 2.774359  | -0.450472 |
| H               | -0.825281 | -1.751524 | -3.519039 | H               | 7.140316  | -1.343871 | 0.764849  |
| H               | -1.411128 | -3.375259 | -2.957540 | H               | 8.047542  | 0.916426  | 0.150881  |
| H               | -2.594749 | -2.015502 | -3.189904 | C               | 2.171597  | -1.298336 | 0.528818  |
| C               | -1.349247 | -1.960100 | 1.355625  | H               | 2.389239  | -1.477447 | 1.602299  |
| O               | -1.829594 | -3.061601 | 1.134756  | C               | 0.677354  | -1.478361 | 0.262965  |
| O               | -1.615174 | -1.188710 | 2.422014  | C               | 0.397554  | -2.102919 | -1.142066 |
| C               | -2.693996 | -1.640910 | 3.272638  | O               | 1.209532  | -2.715642 | -1.803154 |
| H               | -3.644306 | -1.623094 | 2.700643  | O               | -0.904838 | -1.947226 | -1.426872 |
| H               | -2.496497 | -2.664017 | 3.647860  | C               | -1.365154 | -2.404412 | -2.717395 |
| H               | -2.736457 | -0.921389 | 4.109130  | H               | -0.829042 | -1.857784 | -3.517176 |
| C               | 0.981453  | 2.696423  | 0.351431  | H               | -1.198385 | -3.494541 | -2.822179 |
| C               | 0.695311  | 3.591815  | -0.703421 | H               | -2.443848 | -2.168847 | -2.740743 |
| C               | 0.856133  | 4.973474  | -0.548661 | C               | 0.064606  | -2.502907 | 1.250157  |
| C               | 1.306216  | 5.438702  | 0.705264  | O               | 0.633182  | -3.525296 | 1.577143  |
| C               | 1.588893  | 4.551658  | 1.762471  | O               | -1.172289 | -2.139410 | 1.620903  |
| C               | 1.426034  | 3.160258  | 1.589498  | C               | -1.922919 | -3.067877 | 2.442945  |
| C               | 0.729280  | 1.269834  | -0.134285 | H               | -1.988694 | -4.052377 | 1.940200  |
| C               | 0.214188  | 1.526430  | -1.613776 | H               | -1.437744 | -3.178538 | 3.432163  |
| H               | 0.637569  | 5.667345  | -1.373949 | H               | -2.924371 | -2.614248 | 2.545467  |

|                 |           |           |           |   |           |           |           |
|-----------------|-----------|-----------|-----------|---|-----------|-----------|-----------|
| C               | -0.269008 | 2.114846  | 0.391975  | H | -6.729997 | 1.631510  | -0.239628 |
| C               | -1.036177 | 2.692650  | -0.644456 | C | -1.048602 | -1.057854 | -0.945769 |
| C               | -1.919536 | 3.746794  | -0.394961 | H | -0.908200 | -0.870508 | -2.032353 |
| C               | -2.017509 | 4.210121  | 0.934000  | C | 0.282636  | -1.525694 | -0.343080 |
| C               | -1.256645 | 3.639963  | 1.973166  | C | 0.041109  | -2.152626 | 1.062804  |
| C               | -0.367640 | 2.577595  | 1.704751  | O | -1.045681 | -2.254520 | 1.600454  |
| C               | 0.537573  | 0.969416  | -0.183990 | O | 1.203295  | -2.597460 | 1.562716  |
| C               | 0.122643  | 1.007808  | -1.721609 | C | 1.148870  | -3.138626 | 2.898274  |
| H               | -2.521423 | 4.188285  | -1.202687 | H | 0.813603  | -2.355050 | 3.605387  |
| H               | -2.708935 | 5.037234  | 1.159892  | H | 0.457304  | -4.004029 | 2.942928  |
| H               | -1.357420 | 4.023915  | 2.999834  | H | 2.178798  | -3.458578 | 3.138445  |
| H               | 0.227776  | 2.115245  | 2.507032  | C | 0.851218  | -2.658252 | -1.217266 |
| H               | -1.240569 | 2.252992  | -2.745948 | O | 0.263392  | -3.722190 | -1.334088 |
| O               | -0.036463 | -0.241573 | 0.435840  | O | 1.998466  | -2.338064 | -1.821491 |
| O               | 0.553044  | 0.256602  | -2.585341 | C | 2.567971  | -3.364264 | -2.666561 |
| N               | -0.771803 | 2.036463  | -1.859642 | H | 2.790293  | -4.275177 | -2.075366 |
| Cu              | -2.031922 | -0.271454 | 0.263142  | H | 1.871272  | -3.622409 | -3.489132 |
| Br              | -4.228991 | 0.035991  | -0.095649 | H | 3.500192  | -2.934075 | -3.074090 |
| H               | 2.716207  | -2.077299 | -0.038093 | C | 1.536047  | 1.915695  | -0.333180 |
|                 |           |           |           | C | 2.300853  | 2.541952  | 0.674795  |
|                 |           |           |           | C | 3.128900  | 3.634774  | 0.389081  |
| <b>3aa'</b>     |           |           |           | C | 3.174279  | 4.084659  | -0.947755 |
| E= -1372.602158 |           |           |           | C | 2.418878  | 3.461568  | -1.959720 |
| G= -1372.309105 |           |           |           | C | 1.587054  | 2.362051  | -1.652813 |
| N               | -0.652248 | 1.044477  | 0.262483  | C | 0.746399  | 0.770936  | 0.287527  |
| C               | -1.494676 | 0.224821  | -0.279883 | C | 1.205920  | 0.845587  | 1.809581  |
| C               | -2.938282 | 0.589286  | -0.273725 | H | 3.722010  | 4.120943  | 1.178063  |
| C               | -3.358731 | 1.765485  | 0.395065  | H | 3.817749  | 4.942401  | -1.200280 |
| C               | -3.908327 | -0.202147 | -0.931631 | H | 2.477575  | 3.832707  | -2.994550 |
| C               | -4.708892 | 2.135562  | 0.409099  | H | 0.992214  | 1.864351  | -2.434655 |
| H               | -2.598384 | 2.377399  | 0.903186  | H | 2.552354  | 2.158731  | 2.780889  |
| C               | -5.262255 | 0.173751  | -0.920899 | O | 1.217947  | -0.455907 | -0.293609 |
| H               | -3.613111 | -1.118871 | -1.462821 | O | 0.844108  | 0.103745  | 2.711295  |
| C               | -5.667649 | 1.340319  | -0.250328 | N | 2.085534  | 1.899178  | 1.905337  |
| H               | -5.020440 | 3.050545  | 0.937691  | H | -1.799803 | -1.859980 | -0.842191 |
| H               | -6.004959 | -0.452210 | -1.440197 |   |           |           |           |
